# Supplementary material for: Iron-catalyzed carbolithiation of alkynes having no heteroatoms
Source: Royal Society of Chemistry journal article supplement (doi:10.1039/b900345b), 2009-01-01

C:\Wrlambda\COMMON\_DEFAULT.ALS

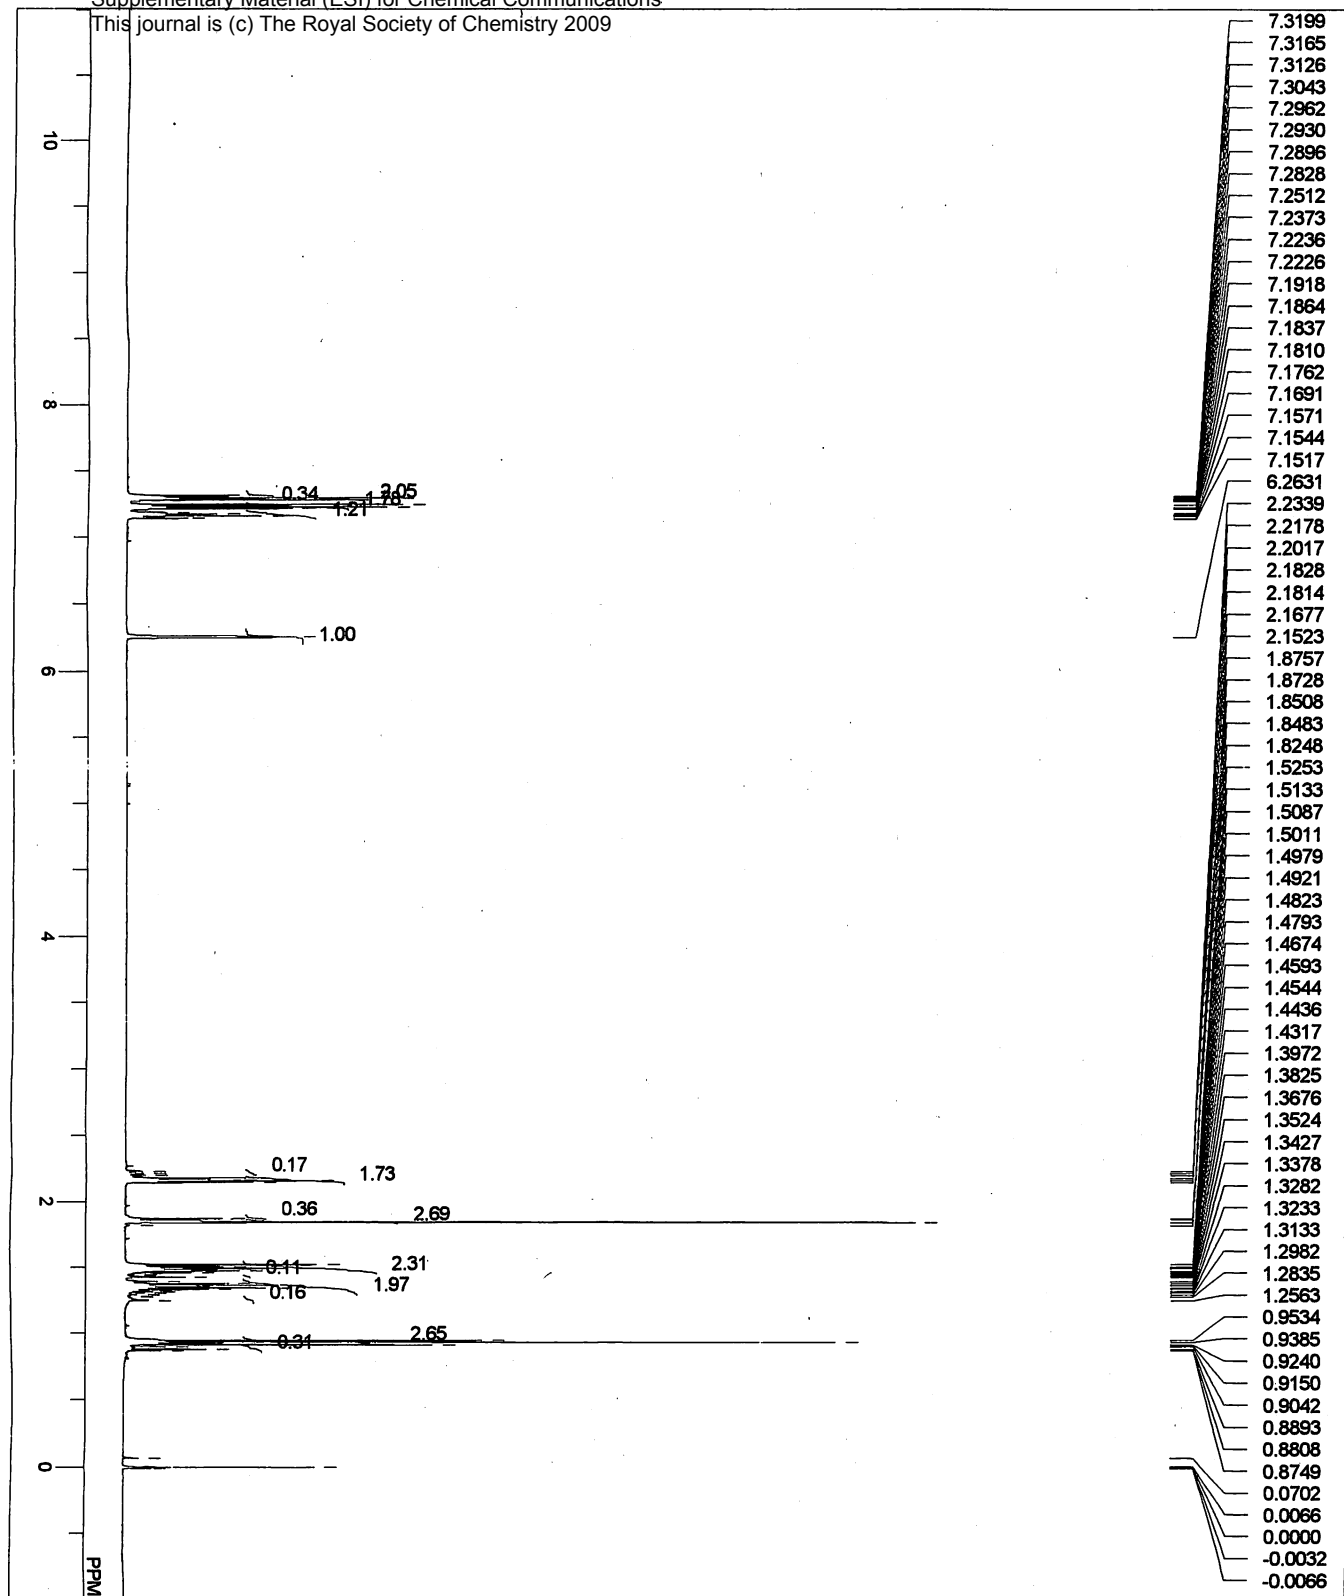

MENUF 1H  
 OBNUC 1H  
 OFR 499.10 MHz  
 OBSSET 0.00 KHz  
 OBFIN 128885.00 Hz  
 PW1 5.50 usec  
 DEADT 72.30 usec  
 PREDL 0.071000 msec  
 IWT 1000.0000 msec  
 POINT 65536  
 SPO 65536  
 TIME 16  
 DUMIN 0  
 FREQ 8000.00 Hz  
 FLT 4000 Hz  
 DELAY 50.00 usec  
 ACQTM 8.1920 sec  
 PD 1.0000 sec  
 ADBIT 16  
 RGAIN 22  
 BF 0.12 Hz  
 T1 0.00  
 T2 0.00  
 T3 90.00  
 T4 100.00  
 EXMOD non  
 EXPCM single pulse nondecoupling & nonpresaturation  
 IRNUC 1H  
 IFR 499.10 MHz  
 IRSET 0.00 KHz  
 IRFIN 128250.00 Hz  
 IRRPW 50 usec  
 IRATN 511  
 DFILE -DEFAULT.ALS  
 SF thesat  
 LKSET 0.00 KHz  
 LKFIN 26934.0 Hz  
 LKLEV 200  
 LGAIN 22  
 LKPHS 353  
 LKSIG 1128  
 CSPED 11 Hz

CDCL3  
 Tue Dec 23 17:48:11 2008

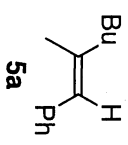

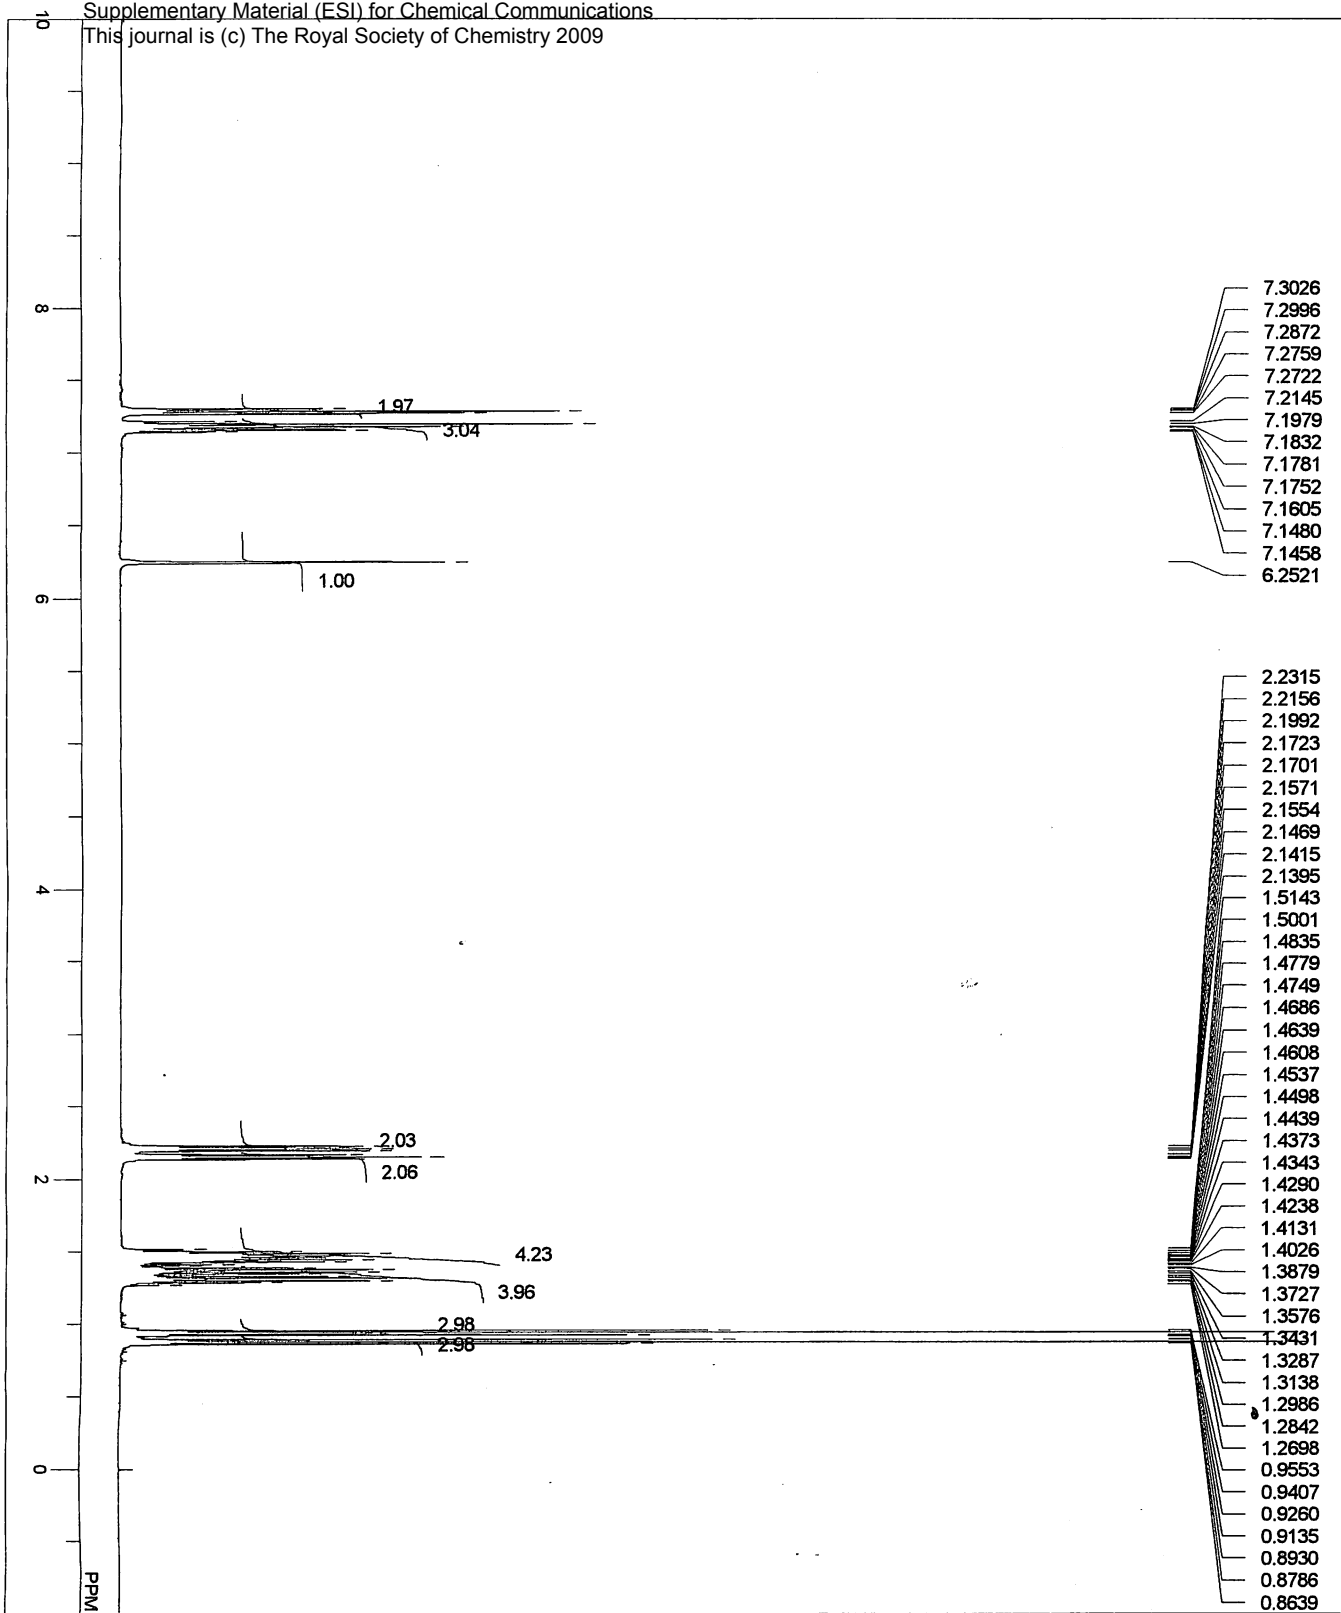

| MENU/F | 1H                                            |
|--------|-----------------------------------------------|
| OBNUC  | 1H                                            |
| OFR    | 499.10 MHz                                    |
| OBSET  | 0.00 KHz                                      |
| OBFIN  | 128850.00 Hz                                  |
| PW1    | 5.50 usec                                     |
| DEADT  | 72.30 usec                                    |
| PREDL  | 0.01000 msec                                  |
| IWT    | 1000.0000 msec                                |
| POINT  | 65536                                         |
| SPO    | 65536                                         |
| TIMES: | 8                                             |
| DUMMY  | 0                                             |
| FREQU  | 8000.00 Hz                                    |
| FLT    | 4000 Hz                                       |
| DELAY  | 50.00 usec                                    |
| ACQTM  | 8.1920 sec                                    |
| PD     | 1.0000 sec                                    |
| ADBIT  | 16                                            |
| RGAIN  | 14                                            |
| BF     | 0.12 Hz                                       |
| T1     | 0.00                                          |
| T2     | 0.00                                          |
| T3     | 90.00                                         |
| T4     | 100.00                                        |
| EXMCD  | non                                           |
| EXPCM  | single pulse nondecoupling & nonpresaturation |
| IRNUC  | 1H                                            |
| IFR    | 499.10 MHz                                    |
| IRSET  | 0.00 KHz                                      |
| IRFIN  | 128250.00 Hz                                  |
| IRRPW  | 50 usec                                       |
| IRATN  | 511                                           |
| DFILE  | _DEFAULT.ALS                                  |
| SF     | th5at                                         |
| LKSET  | 0.00 KHz                                      |
| LKFIN  | 26934.0 Hz                                    |
| LKLEV  | 200                                           |
| LGAIN  | 20                                            |
| LKPHS  | 349                                           |
| LKSIG  | 657                                           |
| CSPED  | 17 Hz                                         |
| FILDC  |                                               |
| FILDF  |                                               |
| SLVNT  | CDCL3                                         |
| DATIM  | Sat Feb 23 19:59:23 2008                      |

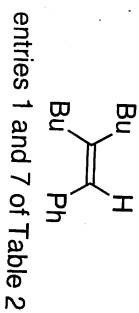

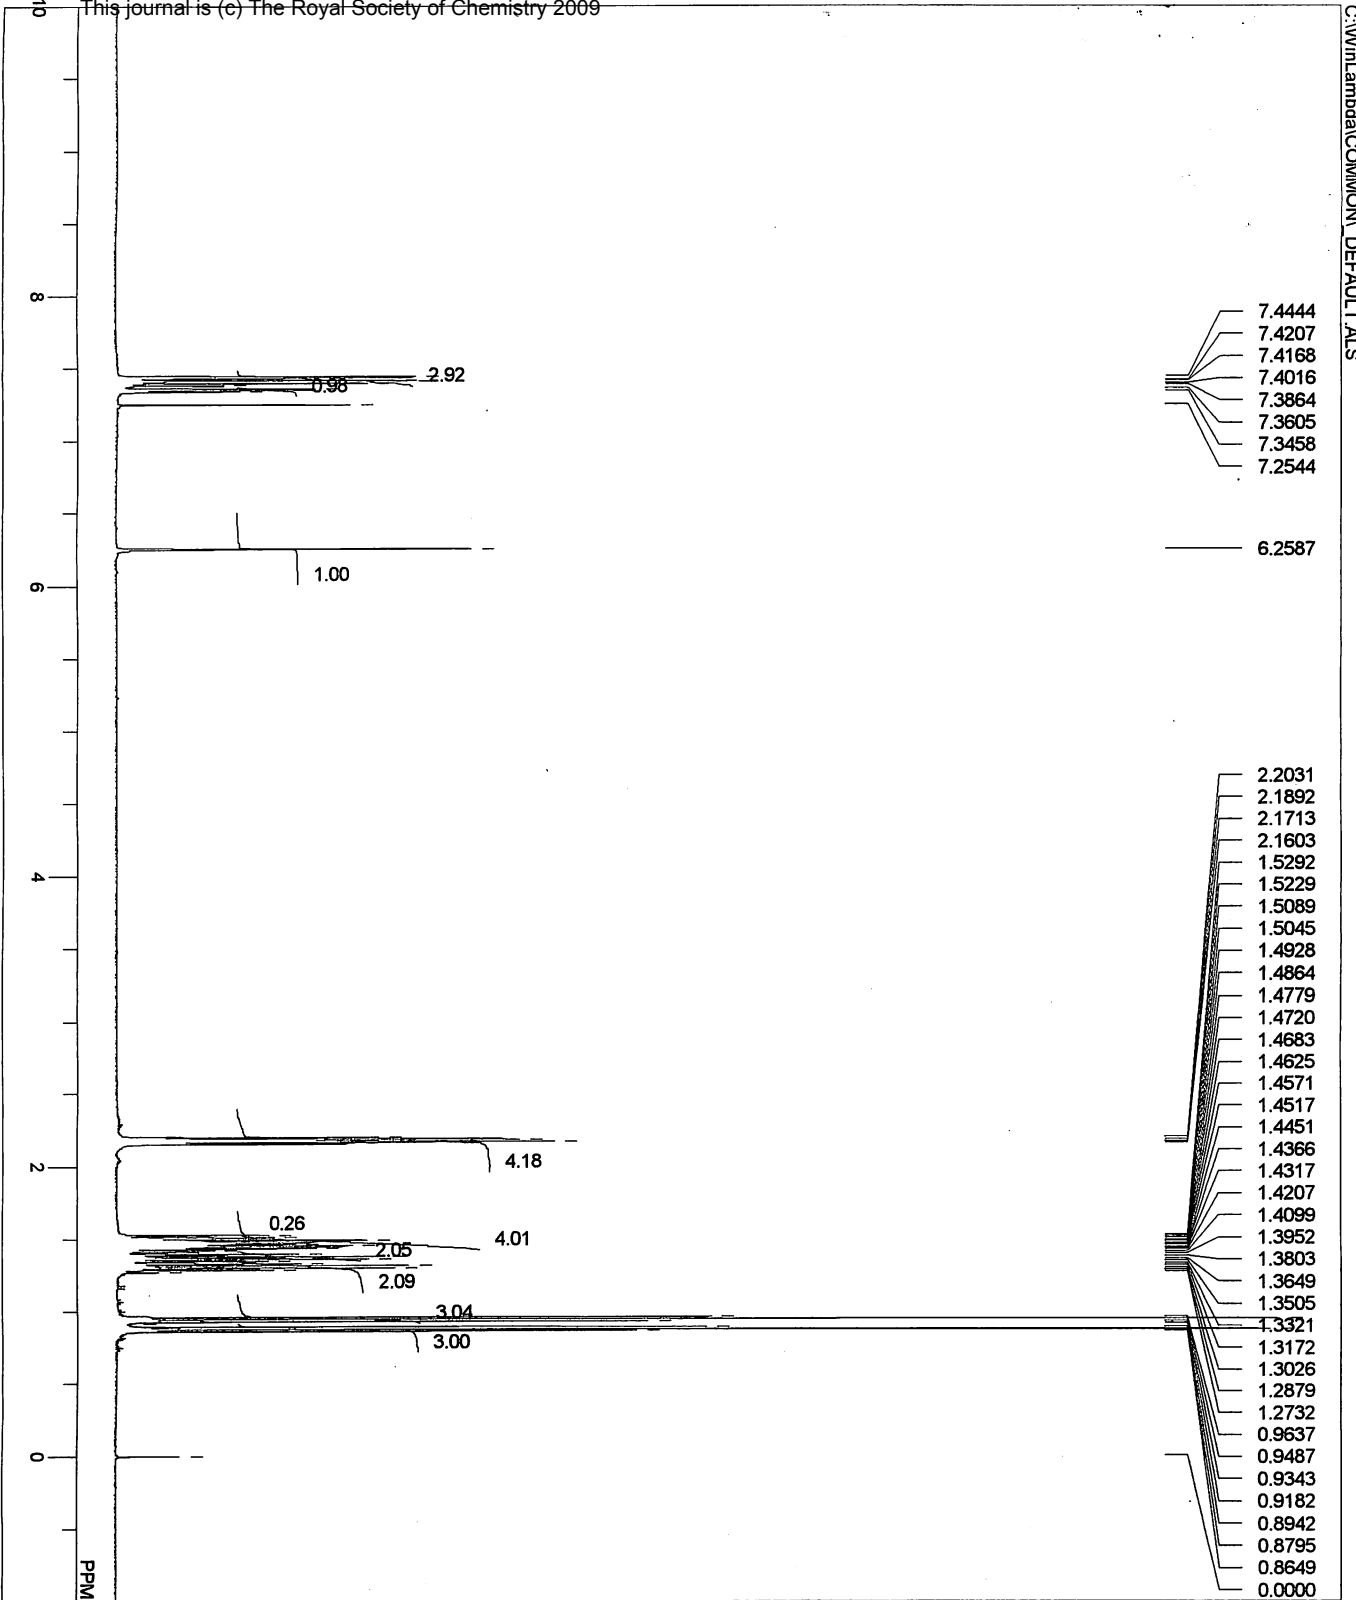

| MENU/F | 1H                                            |
|--------|-----------------------------------------------|
| ORNUC  | 1H                                            |
| OFFR   | 499.10 MHz                                    |
| OBSET  | 0.00 KHz                                      |
| OFFIN  | 128885.00 Hz                                  |
| PW1    | 5.50 usec                                     |
| DEADT  | 72.30 usec                                    |
| PREDL  | 0.01000 msec                                  |
| IMT    | 1000.0000 msec                                |
| POINT  | 65536                                         |
| SPO    | 65536                                         |
| TIMES  | 8                                             |
| DUMMY  | 0                                             |
| FREQU  | 8000.00 Hz                                    |
| FLT    | 4000 Hz                                       |
| DELAY  | 50.00 usec                                    |
| ACQTM  | 8.1920 sec                                    |
| PD     | 1.0000 sec                                    |
| ADBIT  | 16                                            |
| RGAIN  | 19                                            |
| BF     | 0.12 Hz                                       |
| T1     | 0.00                                          |
| T2     | 0.00                                          |
| T3     | 90.00                                         |
| T4     | 100.00                                        |
| EXMOD  | non                                           |
| EXP-CM | single pulse nondecoupling & nonpresaturation |
| IRNUC  | 1H                                            |
| IR     | 499.10 MHz                                    |
| IRSET  | 0.00 KHz                                      |
| IRFIN  | 128250.00 Hz                                  |
| IRRPW  | 50 usec                                       |
| IRATN  | 511                                           |
| DRFILE | _DEFAULT.ALS                                  |
| SF     | th5at                                         |
| LKSET  | 0.00 KHz                                      |
| LKFIN  | 26934.0 Hz                                    |
| LKLEV  | 200                                           |
| LGAIN  | 20                                            |
| LKPHS  | 349                                           |
| LKSIG  | 705                                           |
| CSPED  | 17 Hz                                         |
| FILDC  |                                               |
| FILDF  |                                               |
| SILVNT |                                               |
| DATIM  |                                               |

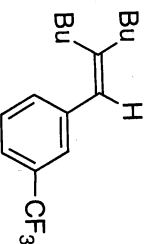

entry 2 of Table 2

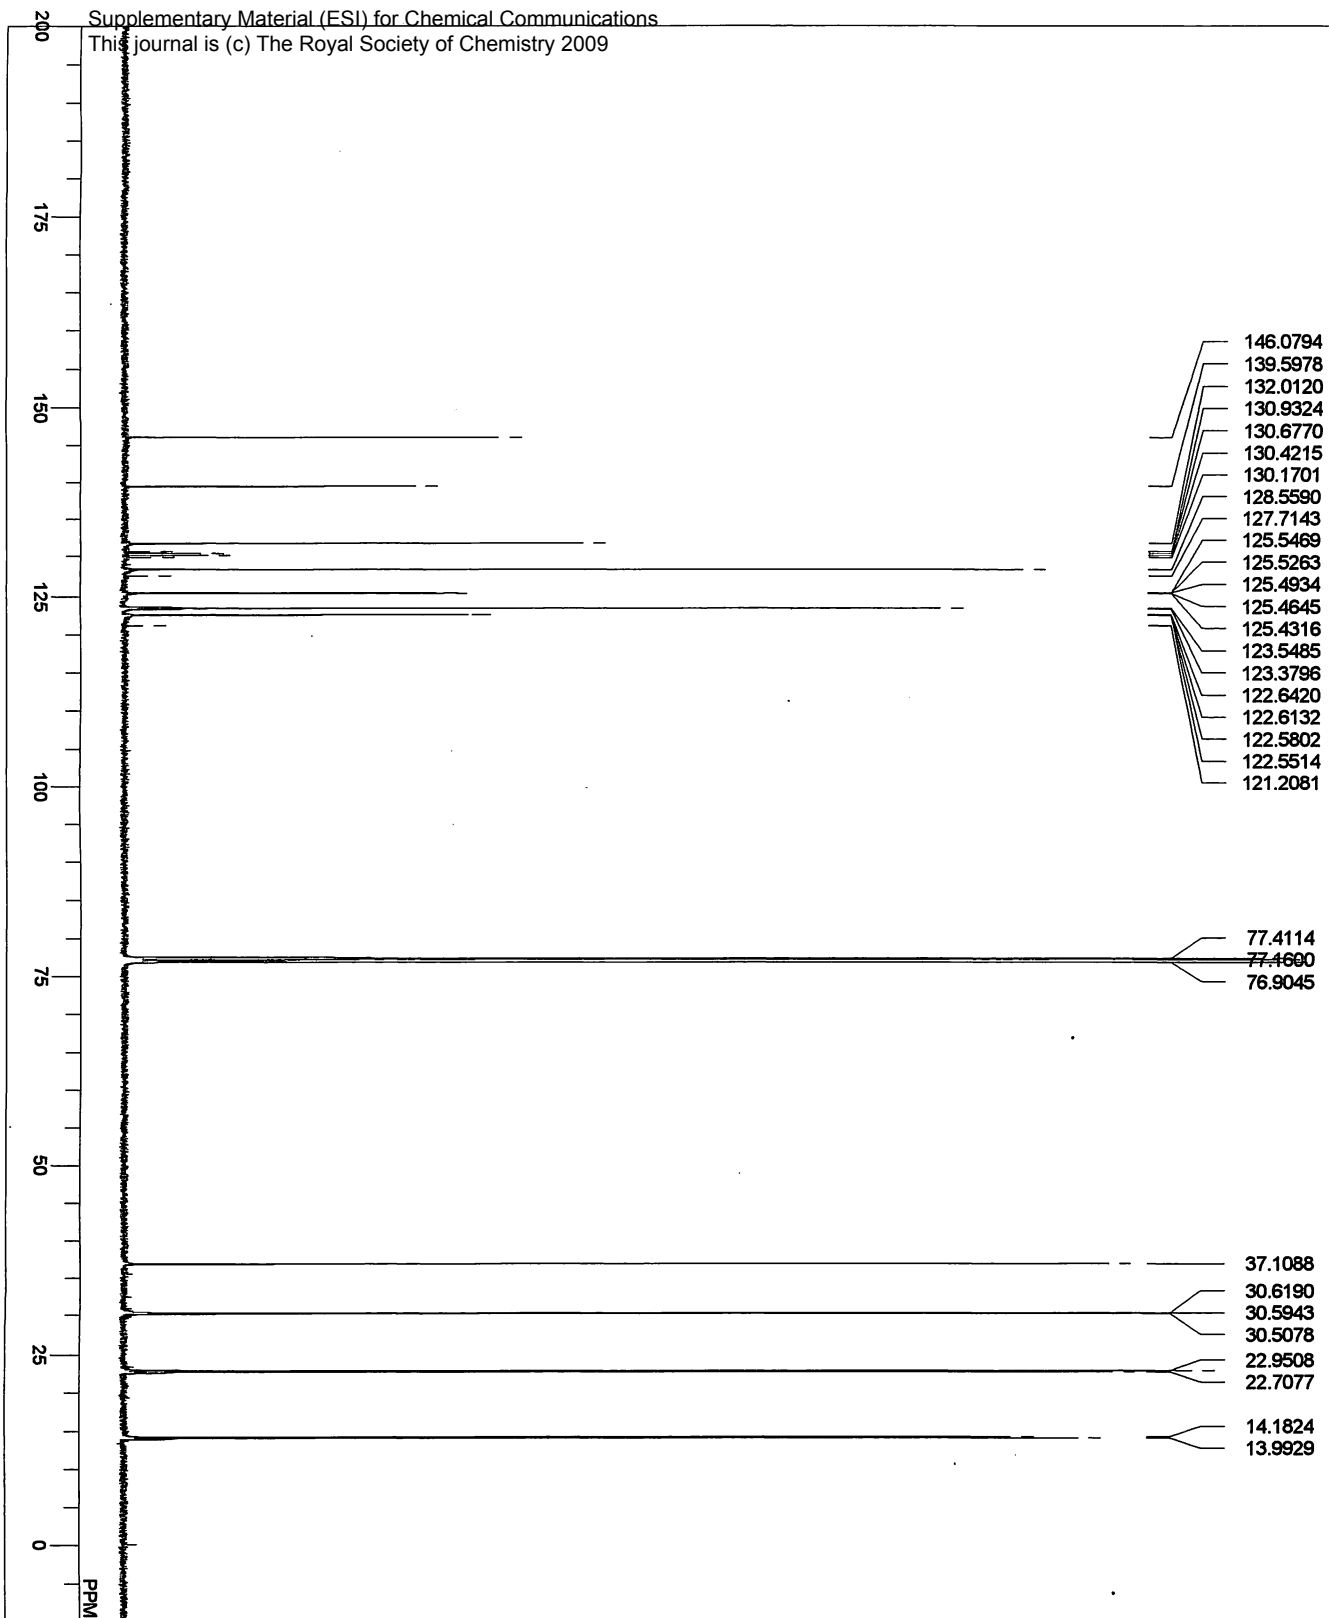

MENUF 13C  
OBRUC 13C  
OFR 125.40 MHz  
OBSET 0.00 KHz  
OBFIN 143041.00 Hz  
PW1 6.25 usec  
DEADT 10.00 usec  
PREDL 0.01000 msec  
WVT 1000.0000 msec  
POINT 65536  
SPO 65536  
TIMES 100000  
DUMMY 2  
FREQU 33898.30 Hz  
FLT 16950 Hz  
DELAY 11.80 usec  
ACQTM 1.9333 sec  
PD 1.0670 sec  
ADBIT 16  
RGAIN 30  
BF 1.20 Hz  
T1 0.00  
T2 0.00  
T3 90.00  
T4 100.00  
EXMOD bcm  
EXPCD single pulse with bilvel decoupling  
IRNUC 1H  
IRFR 499.10 MHz  
IRSET 0.00 KHz  
IRFIN 128250.00 Hz  
IRRPW 50 usec  
IRATN 511  
DFILE m-trifluoromethyl-c13-2nd.a1s  
SF th5at  
LKSET 0.00 KHz  
LKFIN 26934.0 Hz  
LKLEV 200  
LGAIN 20  
LKPHS 353  
LKSIG 546  
CSPED 15 Hz  
FLDF  
FLDC  
SIVNT  
DATIM

CDCl<sub>3</sub>  
Wed Mar 05 06:50:43 2008

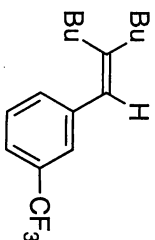

entry 2 of Table 2

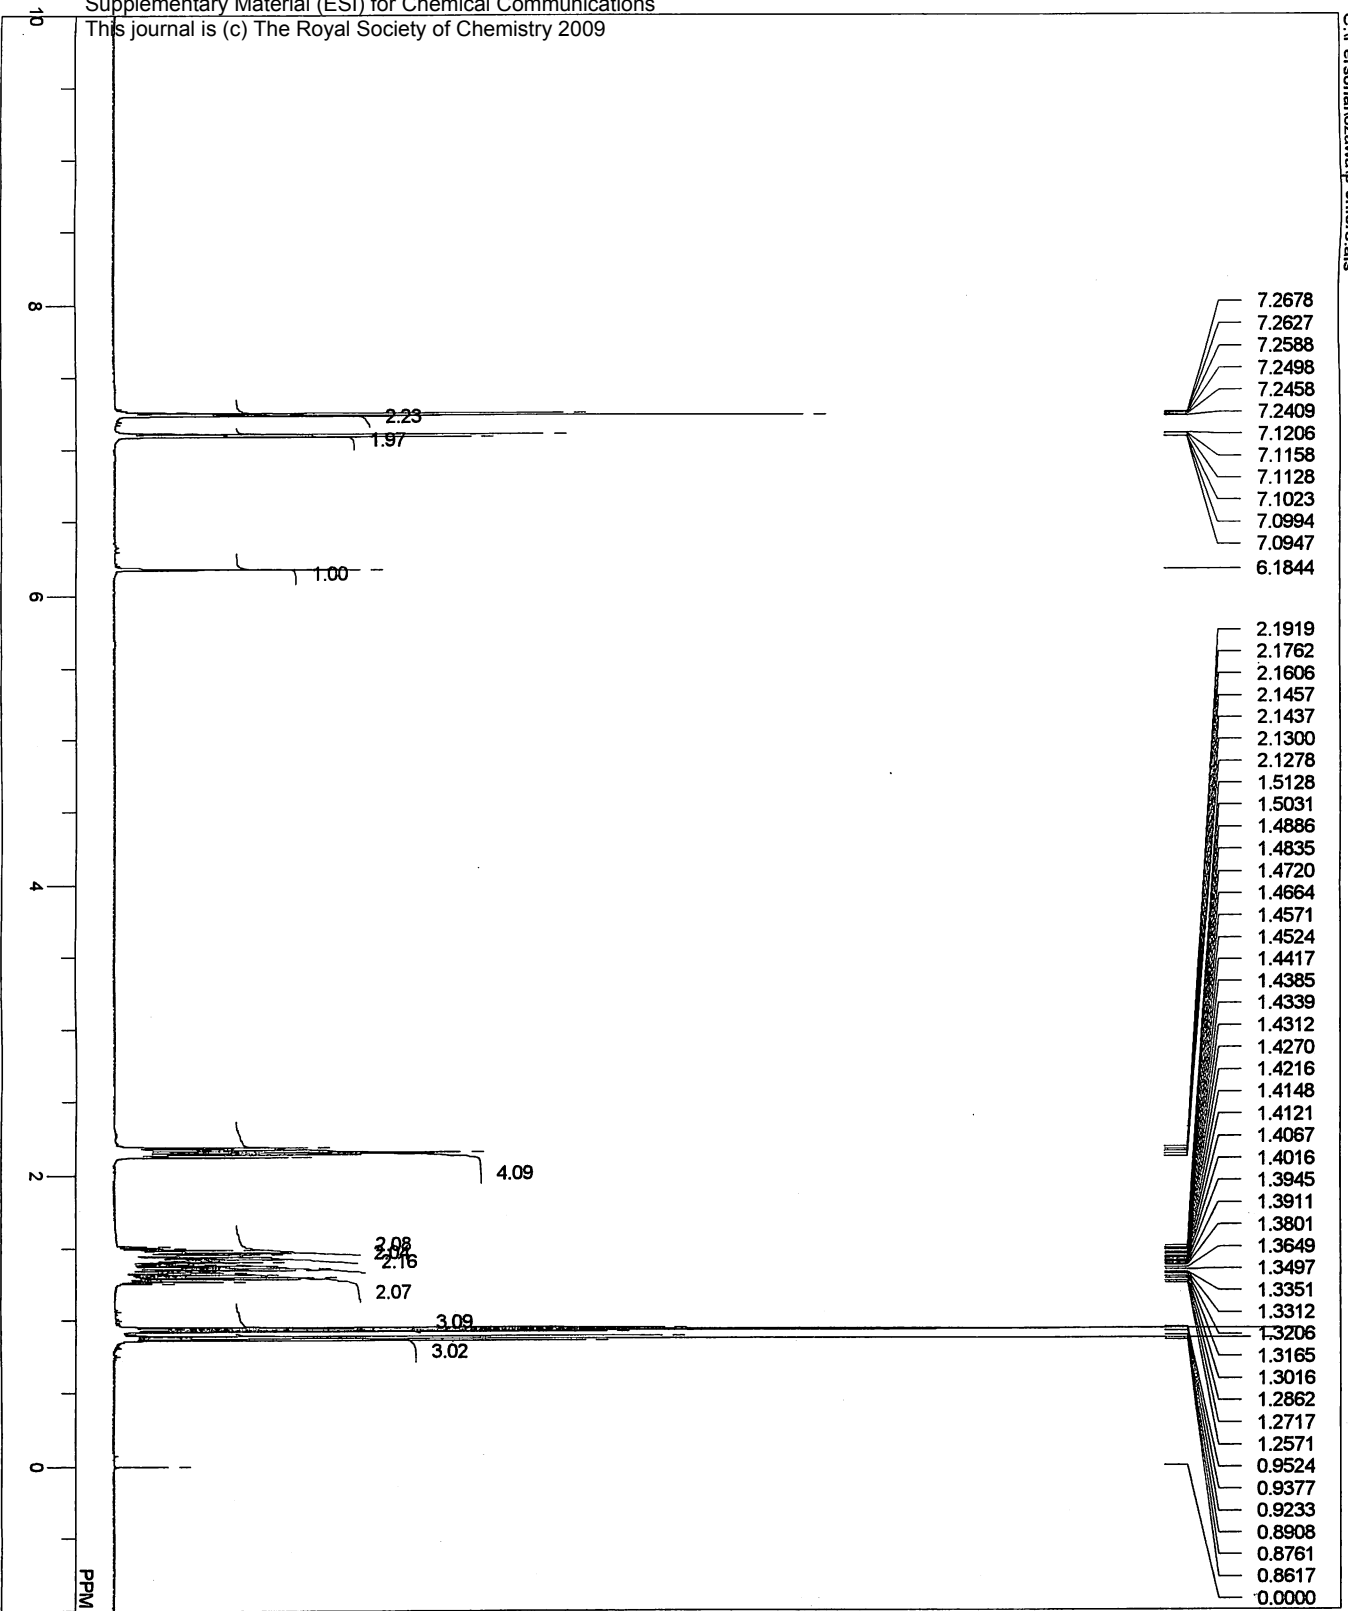

| Parameter | Value                                         |
|-----------|-----------------------------------------------|
| MENUF     | 1H                                            |
| OBNUC     | 1H                                            |
| OFR       | 499.10 MHz                                    |
| OBSSET    | 0.00 KHz                                      |
| OBFIN     | 128885.00 Hz                                  |
| PW1       | 5.50 usec                                     |
| DEADT     | 72.30 usec                                    |
| PREDL     | 0.010000 msec                                 |
| IWT       | 1000.0000 msec                                |
| POINT     | 65536                                         |
| SPO       | 65536                                         |
| TIMES     | 8                                             |
| DUMNY     | 0                                             |
| FREQU     | 8000.00 Hz                                    |
| FLT       | 4000 Hz                                       |
| DELAY     | 50.00 usec                                    |
| ACQTM     | 8.1920 sec                                    |
| PD        | 1.0000 sec                                    |
| ADBIT     | 16                                            |
| RGAIN     | 16                                            |
| BF        | 0.12 Hz                                       |
| T1        | 0.00                                          |
| T2        | 0.00                                          |
| T3        | 90.00                                         |
| T4        | 100.00                                        |
| EXMOD     | non                                           |
| EXPCM     | single pulse nondecoupling & nonpresaturation |
| IRNUC     | 1H                                            |
| IFR       | 499.10 MHz                                    |
| IRSET     | 0.00 KHz                                      |
| IRFIN     | 128250.00 Hz                                  |
| IRRPW     | 50 usec                                       |
| IRATN     | 511                                           |
| DFILE     | p-chloro.als                                  |
| SF        | thsat                                         |
| LKSET     | 0.00 KHz                                      |
| LKFIN     | 26934.0 Hz                                    |
| LKLEV     | 200                                           |
| LGAIN     | 20                                            |
| LKPHS     | 349                                           |
| LKSIG     | 711                                           |
| CSPED     | 16 Hz                                         |
| FILDC     |                                               |
| FILDF     |                                               |
| SLVNT     | CDCl3                                         |
| DATM      | Tue Feb 26 00:20:55 2008                      |

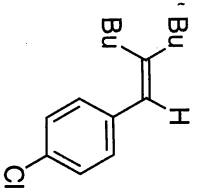

entry 3 of Table 2

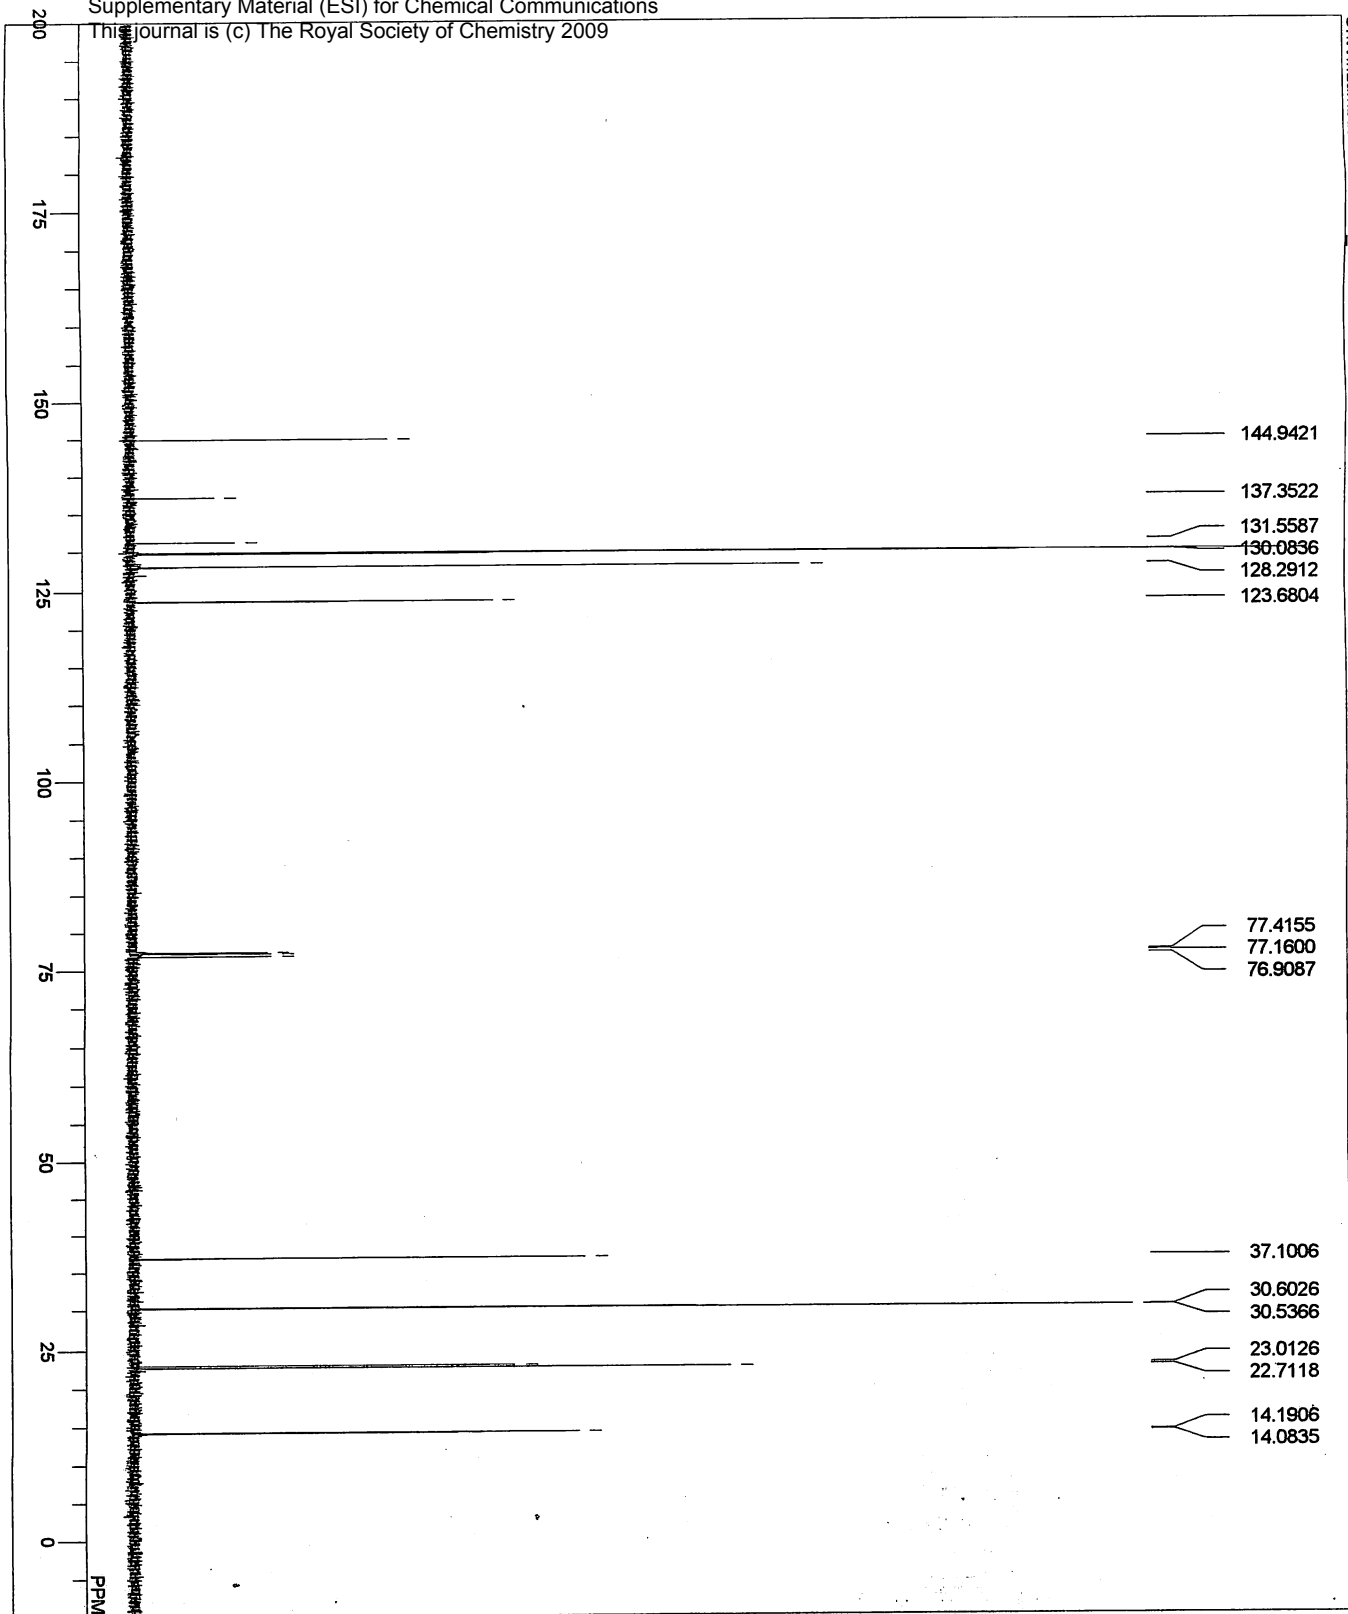

MENUF 13C  
 OBNUC 13C  
 OFR 125.40 MHz  
 OBSET 0.00 KHz  
 OBFIN 143041.00 Hz  
 PW1 6.25 usec  
 DEADT 10.00 usec  
 PREDL 0.01000 msec  
 IWT 1000.0000 msec  
 POINT 65536  
 SPO 65536  
 TIMES 1024  
 DUMMY 2  
 FRECU 33898.30 Hz  
 FLT 16950 Hz  
 DELAY 11.80 usec  
 ACQTM 1.9333 sec  
 PD 1.0670 sec  
 ADBIT 16  
 RGAIN 29  
 BF 0.12 Hz  
 T1 0.00  
 T2 0.00  
 T3 90.00  
 T4 100.00  
 EXMOD bern  
 EXPCM single pulse with bi-level decoupling  
 IRNUC 1H  
 IFR 499.10 MHz  
 IRSET 0.00 KHz  
 IRFIN 128250.00 Hz  
 IRRPW 50 usec  
 IRATTN 511  
 DEFILE  
 SF  
 LKSET 0.00 KHz  
 LKFIN 26934.0 Hz  
 LKLEV 200  
 LGAIN 20  
 LKPHS 349  
 LKSIG 703  
 CSPED 16 Hz  
 FILDC  
 FILDFF  
 SLVNT  
 SLVNT CDCl<sub>3</sub>  
 DATIM Tue Feb 26 00:28:45 2008

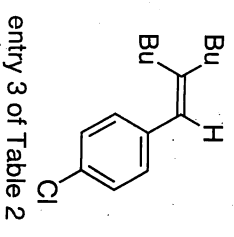

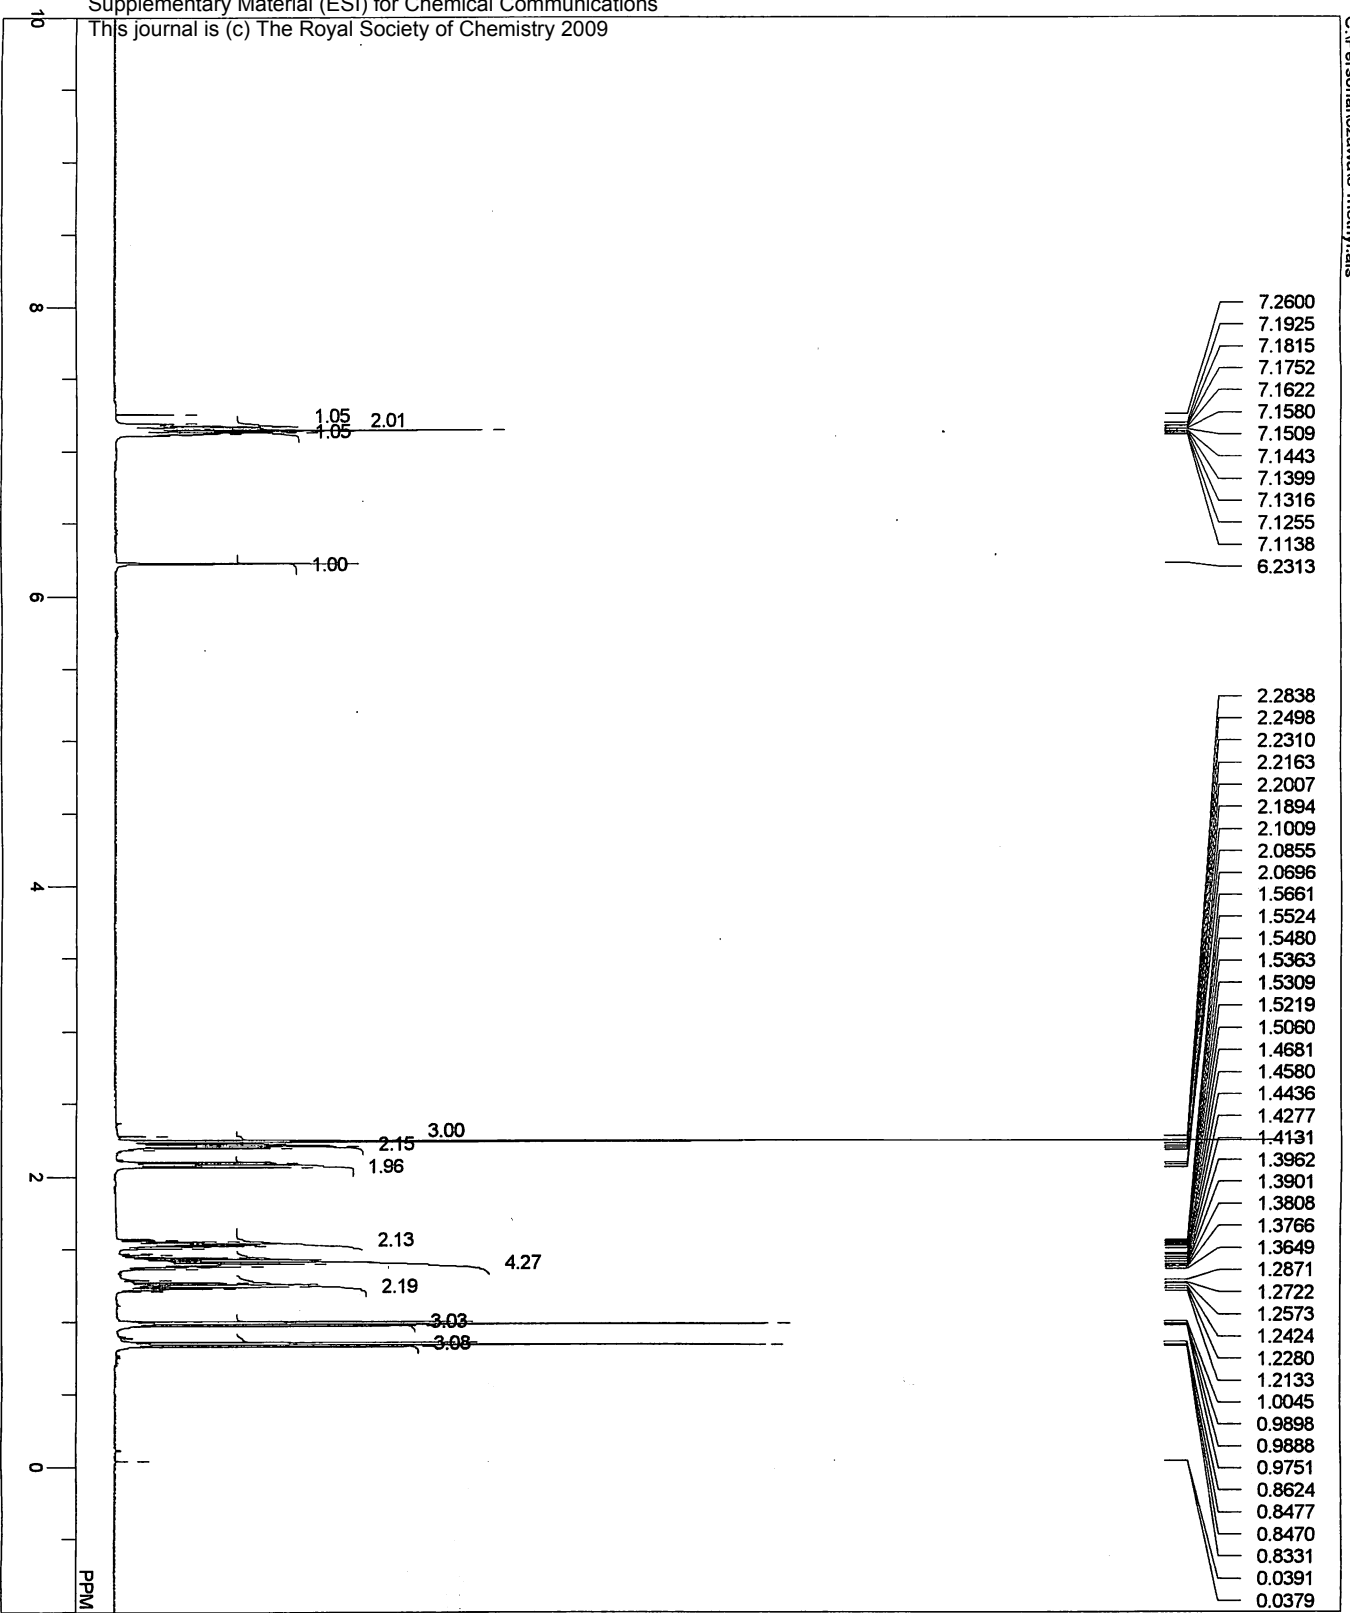

MENUC 1H  
 OBRNUC 1H  
 OBSSET 499.10 MHz  
 OBSFIN 0.00 KHz  
 OBFIN 128885.00 Hz  
 PWD1 5.50 usec  
 DEADT 72.30 usec  
 PREDL 0.01000 msec  
 IWT 1000.0000 msec  
 POINT 65536  
 SPO 65536  
 TIMES 8  
 DUMNY 0  
 FREQU 8000.00 Hz  
 FLT 4000 Hz  
 DELAY 50.00 usec  
 ACQTM 8.1920 sec  
 PD 1.0000 sec  
 ADBIT 16  
 RGAIN 15  
 BF 0.12 Hz  
 T1 0.00  
 T2 0.00  
 T3 100.00  
 T4 100.00  
 EXMOD non  
 EXPCM single pulse nondecoupling & nonpresaturation  
 IRNUC 1H  
 IFR 499.10 MHz  
 IRSET 0.00 KHz  
 IRFIN 128250.00 Hz  
 IRRPW 50 usec  
 IRATN 511  
 o-methyl.als  
 DFILE th5at  
 SF 0.00 KHz  
 LKSET 26934.0 Hz  
 LKFIN 200  
 LKLEV 20  
 LGAIN 349  
 LKPHS 700  
 CSPED 16 Hz  
 FILDG  
 FILDF  
 SLVNT  
 DATM

CDCl3  
 Thu Feb 28 12:00:17 2008

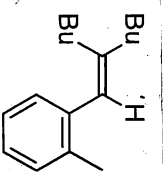

entry 4 of Table 2

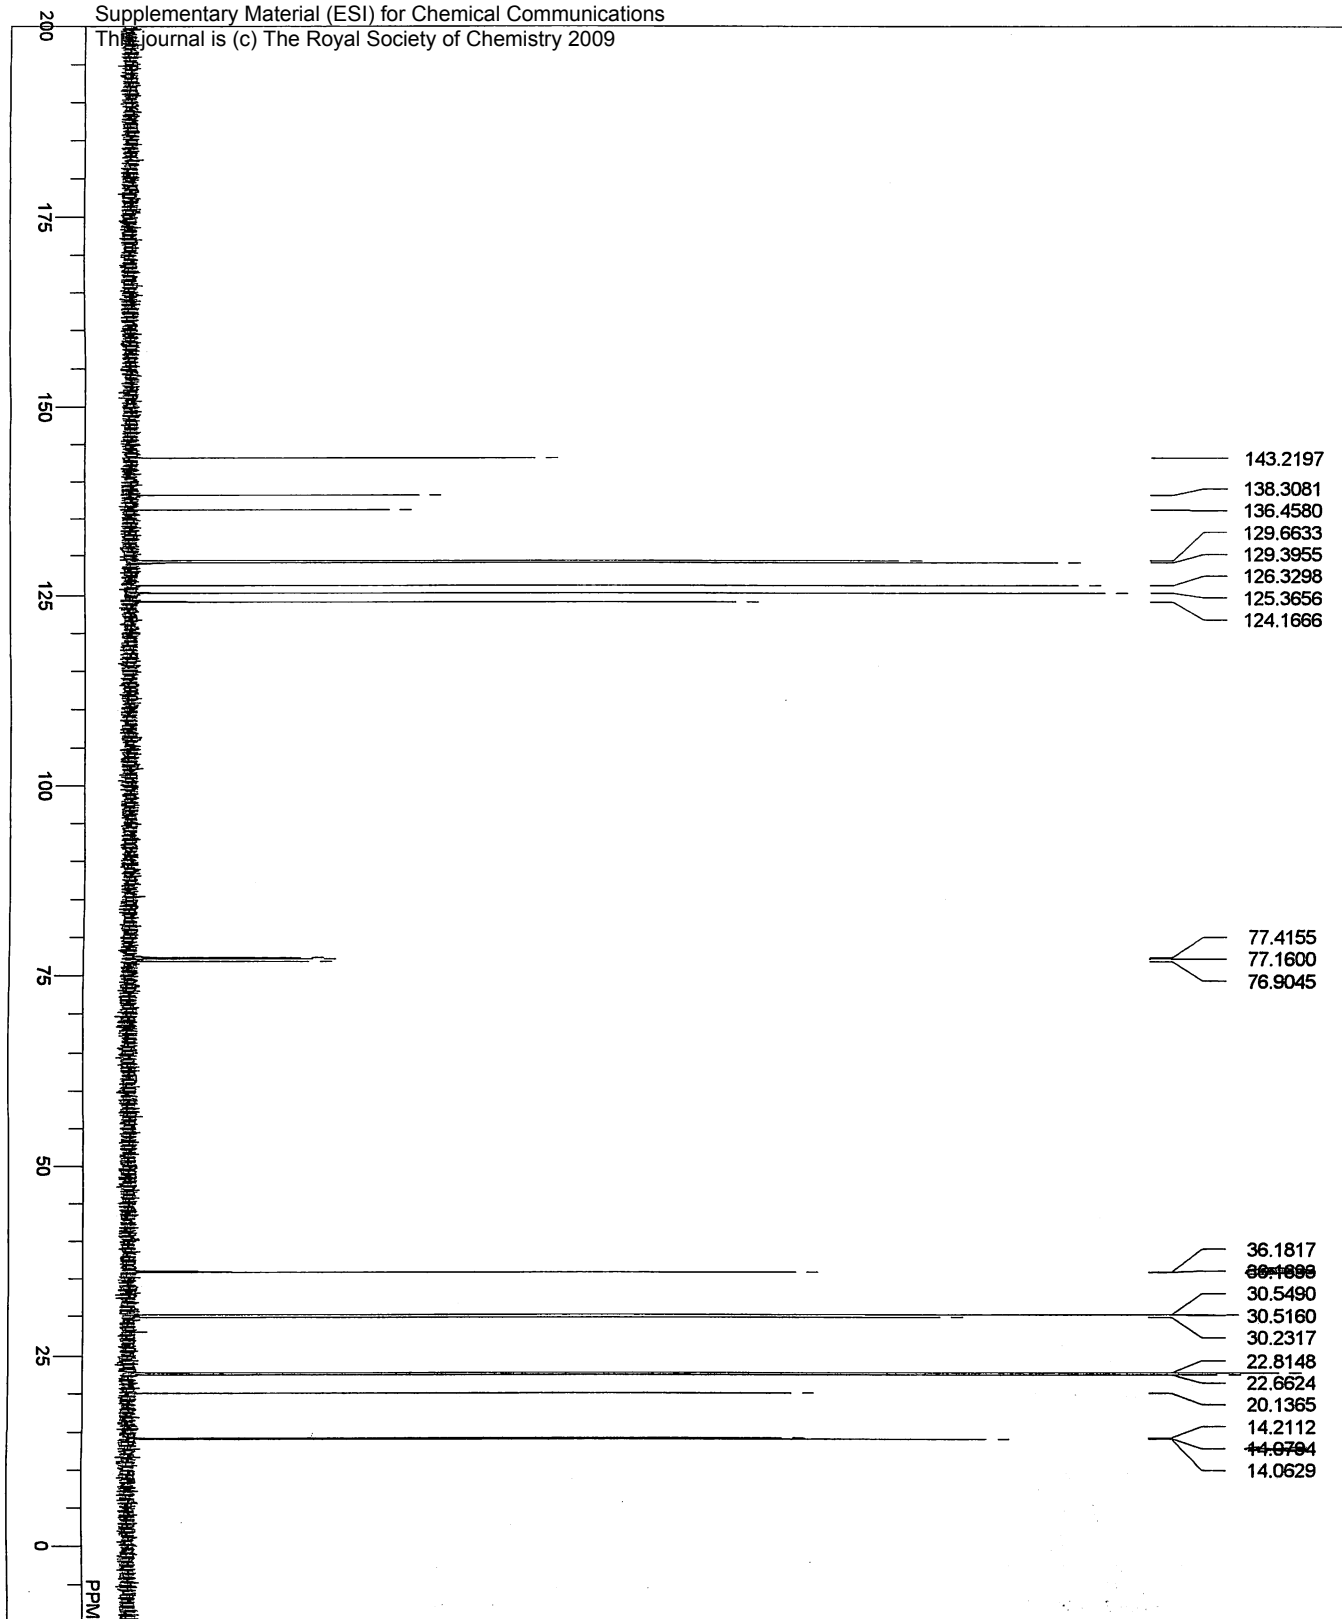

|       |                                     |
|-------|-------------------------------------|
| MENUF | 13C                                 |
| OBNUC | 13C                                 |
| OFR   | 125.40 MHz                          |
| OBSET | 0.00 KHz                            |
| OBFIN | 143041.00 Hz                        |
| PW1   | 6.25 usec                           |
| DEADT | 10.00 usec                          |
| PREDL | 0.01000 msec                        |
| IWT   | 1000.0000 msec                      |
| POINT | 65536                               |
| SPO   | 65536                               |
| TIMES | 1024                                |
| DUMNY | 2                                   |
| FREQU | 33898.30 Hz                         |
| FLT   | 16950 Hz                            |
| DELAY | 11.80 usec                          |
| ACQTM | 1.9333 sec                          |
| PD    | 1.0670 sec                          |
| ADBIT | 16                                  |
| RGAIN | 30                                  |
| BF    | 0.12 Hz                             |
| T1    | 0.00                                |
| T2    | 0.00                                |
| T3    | 100.00                              |
| T4    | 100.00                              |
| EXMOD | bcm                                 |
| EXPCM | single pulse with bilvel decoupling |
| IRNUC | 1H                                  |
| IFR   | 499.10 MHz                          |
| IRSET | 0.00 KHz                            |
| IRFIN | 128250.00 Hz                        |
| IRRPW | 50 usec                             |
| IRATN | 511                                 |
| DFILE | _DEFAULT.ALS                        |
| SF    | ticks                               |
| LKSET | 0.00 KHz                            |
| LKFIN | 26934.0 Hz                          |
| LKLEV | 200                                 |
| LGAIN | 20                                  |
| LKPHS | 349                                 |
| LKSIG | 697                                 |
| CSPED | 16 Hz                               |
| FILDC |                                     |
| FILDF |                                     |
| SLVNT | CDCL3                               |
| DATIM | Thu Feb 28 12:09:05 2008            |

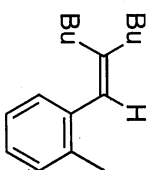

entry 4 of Table 2



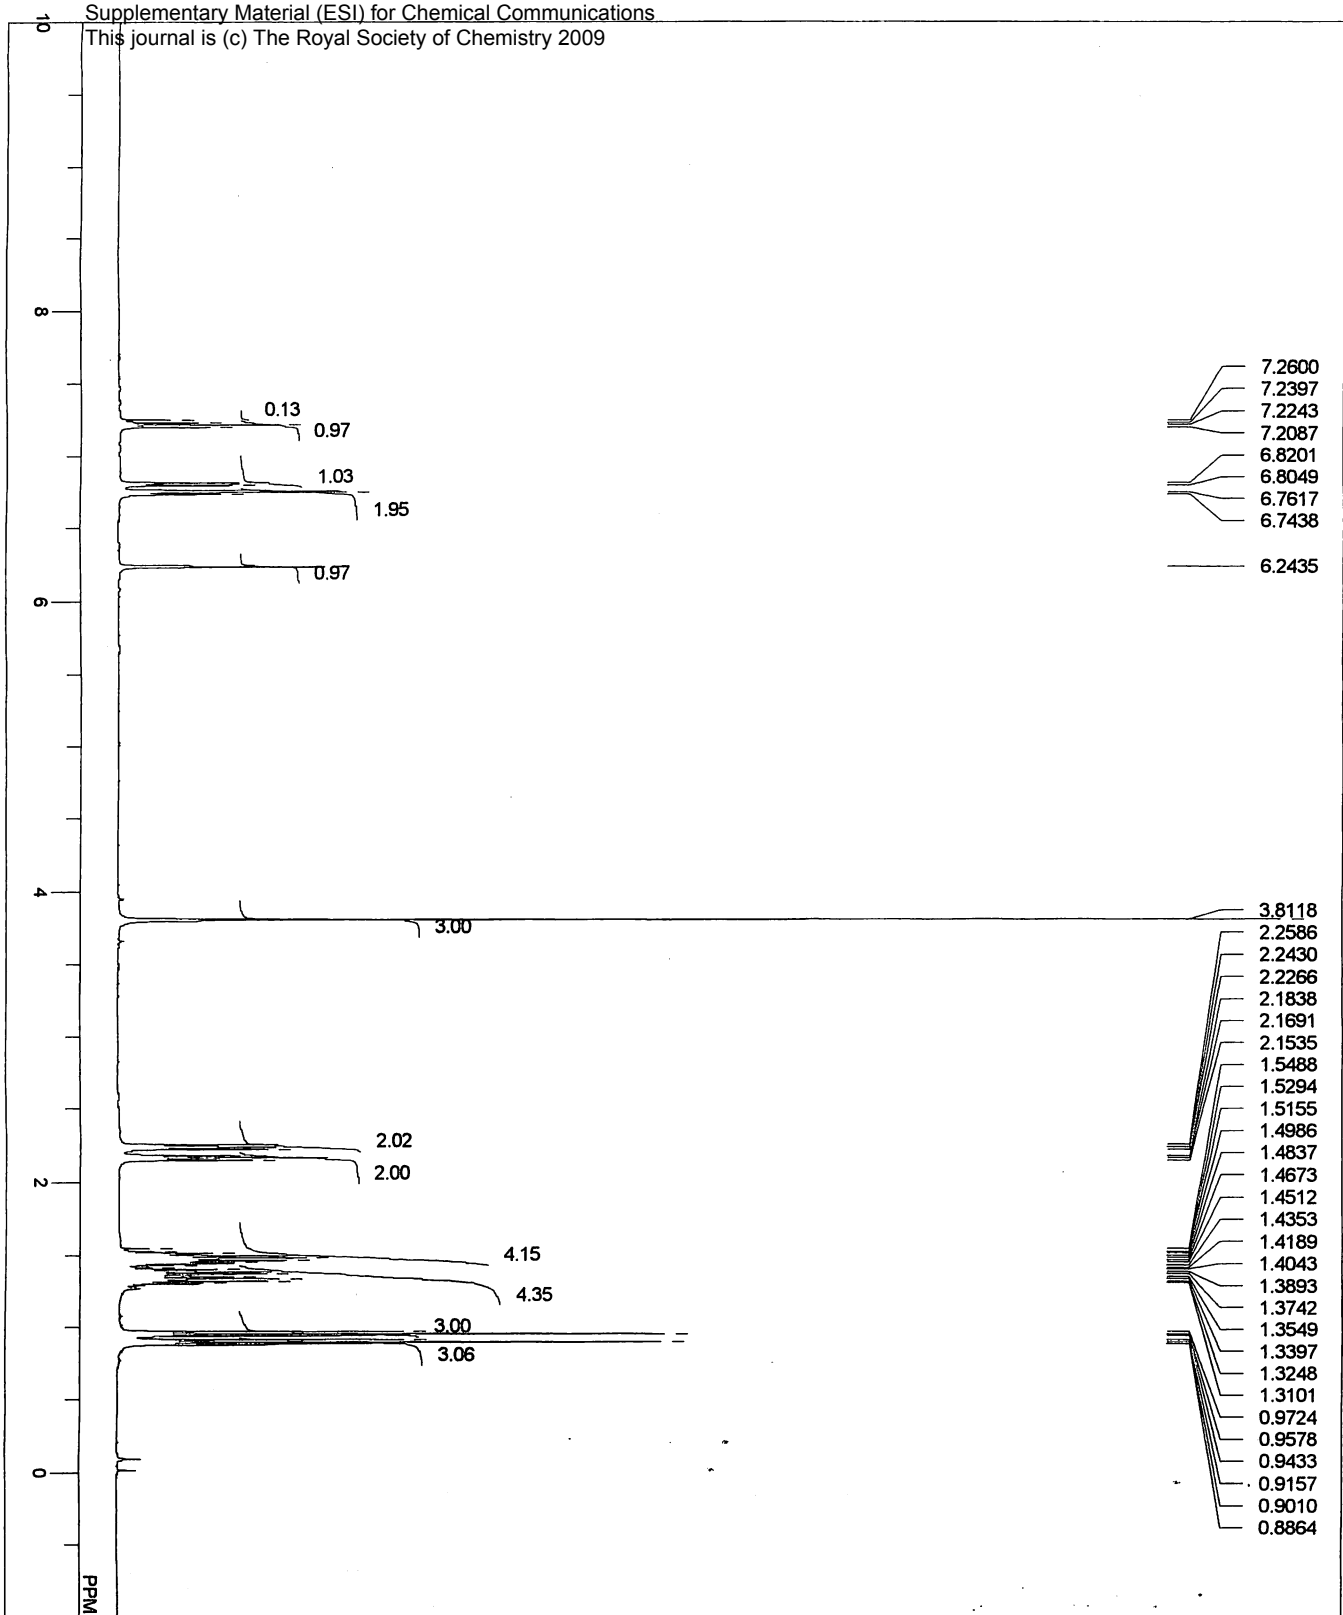

|       |                                               |
|-------|-----------------------------------------------|
| MENUF | 1H                                            |
| OBRUC | 1H                                            |
| OBSET | 499.10 MHz                                    |
| OBFIN | 0.00 KHz                                      |
| PW1   | 128885.00 Hz                                  |
| DEADT | 5.50 usec                                     |
| PREDL | 72.30 usec                                    |
| WT    | 0.01000 msec                                  |
| POINT | 1000.0000 msec                                |
| SPO   | 65536                                         |
| DUMMY | 8                                             |
| FREQU | 0                                             |
| FLT   | 8000.00 Hz                                    |
| DELAY | 4000 Hz                                       |
| ACQTM | 50.00 usec                                    |
| PD    | 8.1920 sec                                    |
| ADBIT | 1.0000 sec                                    |
| RGAIN | 16                                            |
| BF    | 17                                            |
| T1    | 1.20 Hz                                       |
| T2    | 0.00                                          |
| T3    | 0.00                                          |
| T4    | 90.00                                         |
| EXMOD | 100.00                                        |
| EXPCM | non                                           |
| IRNUC | single pulse nondecoupling & nonpresaturation |
| IFR   | 1H                                            |
| IRSET | 499.10 MHz                                    |
| IRFIN | 0.00 KHz                                      |
| IRRPW | 128250.00 Hz                                  |
| IRATN | 50 usec                                       |
| DFILE | 511                                           |
| SF    | m-methoxy.als                                 |
| LKSET | th5at                                         |
| LKFIN | 0.00 KHz                                      |
| LKLEV | 26934.0 Hz                                    |
| LGAIN | 200                                           |
| LKPHS | 20                                            |
| LKSIG | 349                                           |
| CSPED | 695                                           |
| FILDC | 14 Hz                                         |
| FILDF |                                               |
| SLVNT | CDCl3                                         |
| DATIM | Wed Feb 20 13:59:52 2008                      |

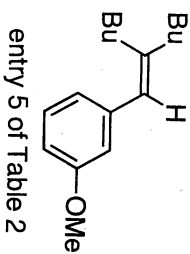

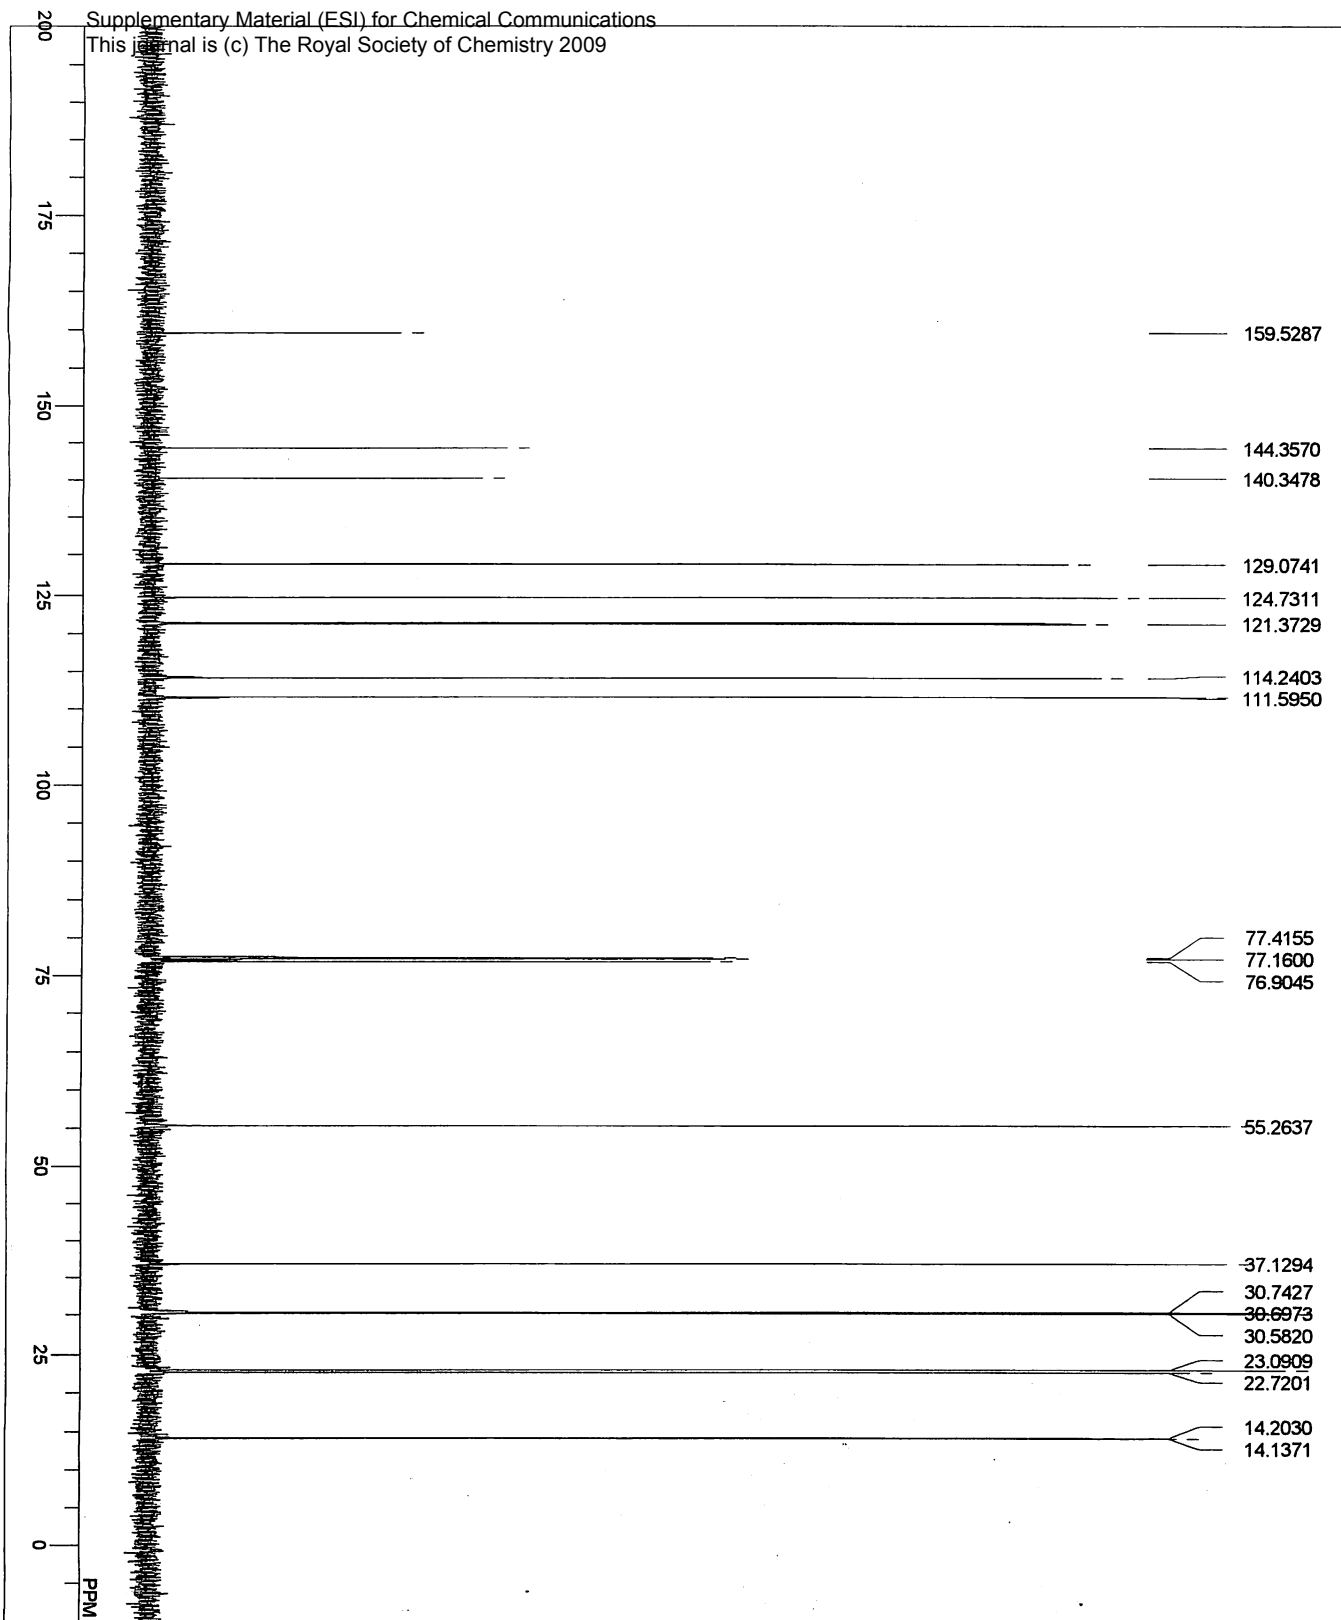

MENUF 13C  
 OBNUC 13C  
 OFR 125.40 MHz  
 OBSET 0.00 KHz  
 OBFIN 143041.00 Hz  
 PW1 6.25 usec  
 DEADT 10.00 usec  
 PREDL 0.07000 msec  
 IWT 1000.0000 msec  
 POINT 65536  
 SPO 65536  
 TIMES 1024  
 DUMINY 2  
 FREQU 33898.30 Hz  
 FLT 16950 Hz  
 DELAY 11.80 usec  
 ACQTM 1.9333 sec  
 PD 1.0670 sec  
 ADBIT 16  
 RGAIN 31  
 BF 1.20 Hz  
 T1 0.00  
 T2 0.00  
 T3 90.00  
 T4 100.00  
 EXMOD bcn  
 EXPCM single pulse with bilvel decoupling  
 IRNUC 1H  
 IFR 499.10 MHz  
 IRSET 0.00 KHz  
 IRFIN 128250.00 Hz  
 IRRPW 50 usec  
 IRATN 511  
 DFILE \_DEFAULT.ALS  
 SF thsat  
 LKSET 0.00 KHz  
 LKFIN 26934.0 Hz  
 LKLEV 200  
 LGAIN 20  
 LKPHS 349  
 LKSIG 696  
 CSPED 11 Hz  
 FILDC  
 FILDF  
 SLVNT  
 DATIM  
 CDCL3  
 Wed Feb 20 14:08:49 2008

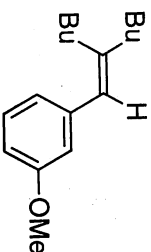

entry 5 of Table 2

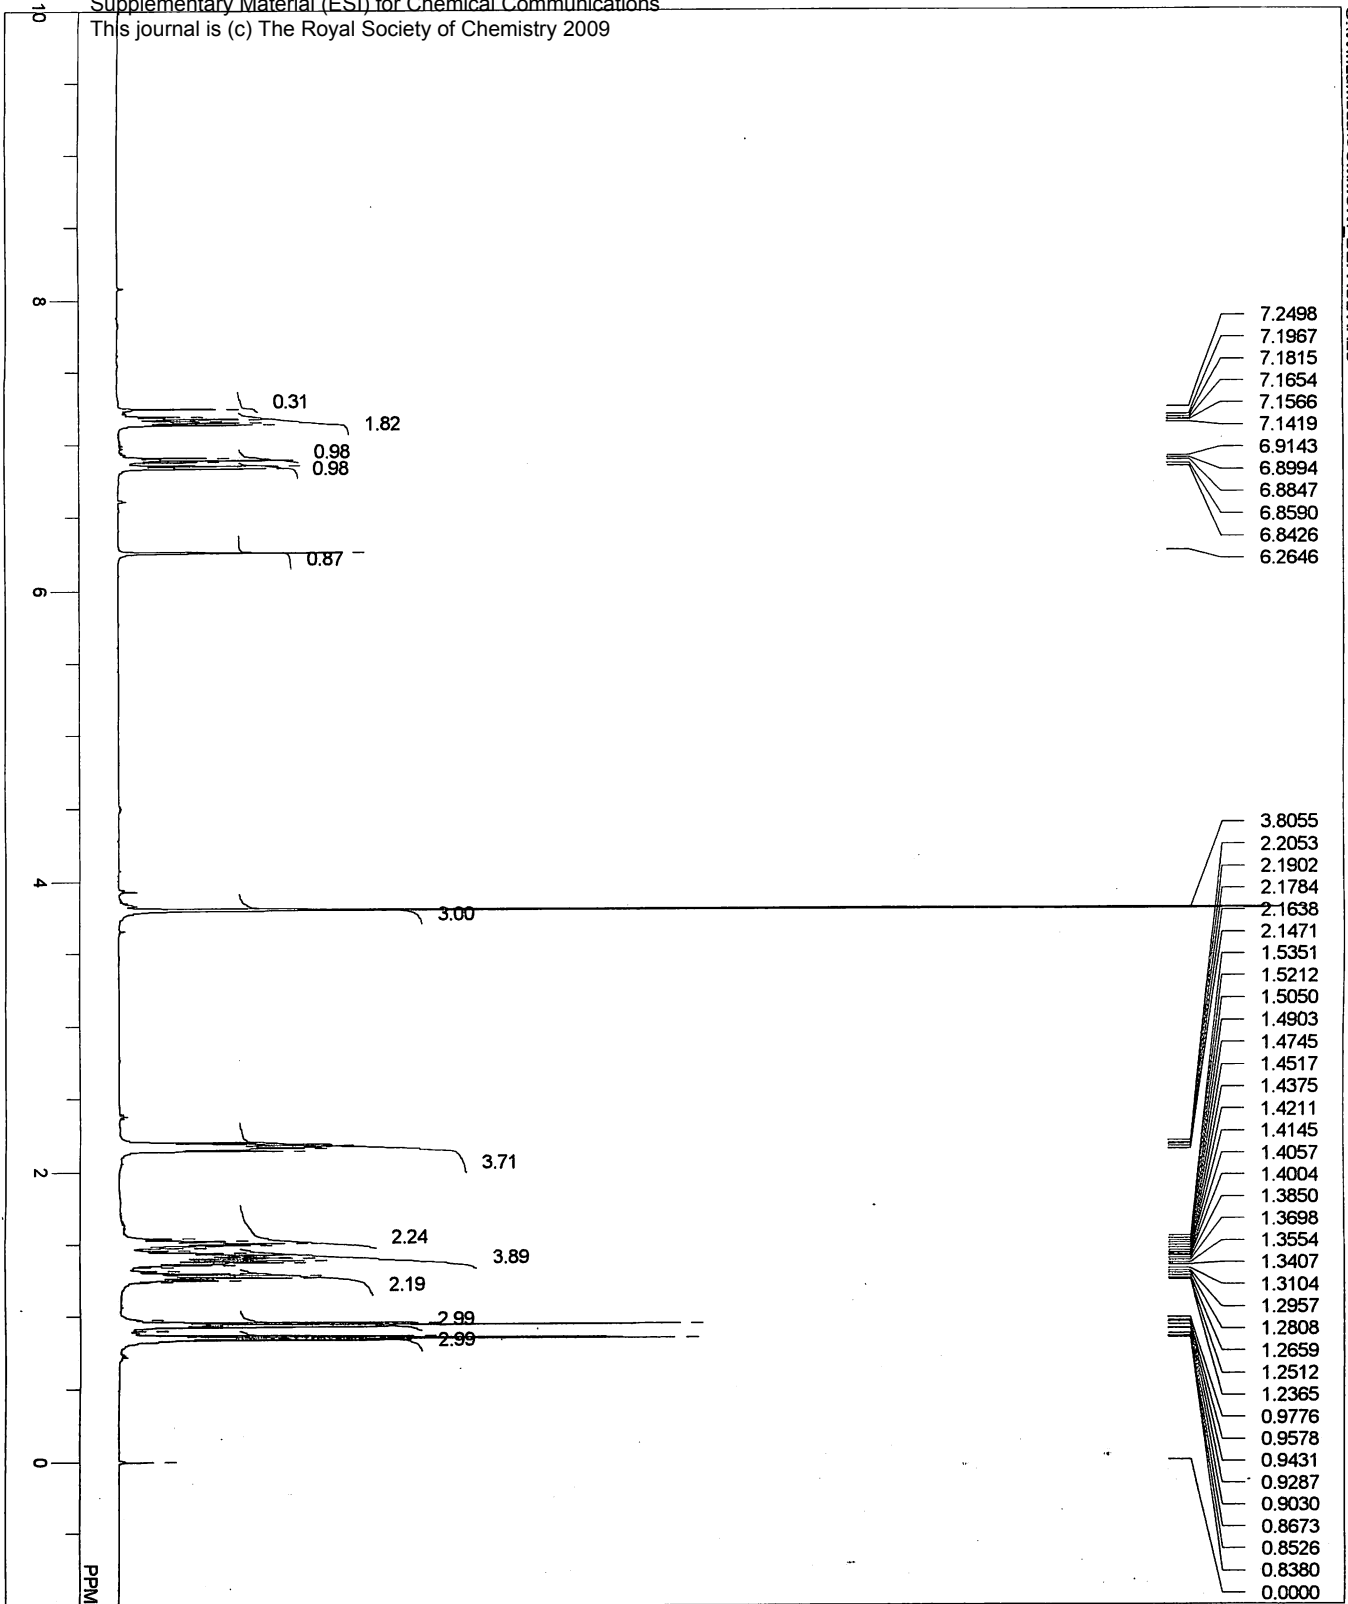

|       |                                               |
|-------|-----------------------------------------------|
| MENUF | 1H                                            |
| OBNUC | 1H                                            |
| OFFR  | 499.10 MHz                                    |
| OBSET | 0.00 KHz                                      |
| OBFIN | 128850.00 Hz                                  |
| PW1   | 5.50 usec                                     |
| DEADT | 72.30 usec                                    |
| PREDL | 0.01000 msec                                  |
| IWT   | 1000.0000 msec                                |
| POINT | 65536                                         |
| SPO   | 65536                                         |
| TIMES | 8                                             |
| DUMNY | 0                                             |
| FREQU | 8000.00 Hz                                    |
| FLT   | 4000 Hz                                       |
| DELAY | 50.00 usec                                    |
| ACQTM | 8.1920 sec                                    |
| PD    | 1.0000 sec                                    |
| ADBIT | 16                                            |
| RGAIN | 19                                            |
| BF    | 1.20 Hz                                       |
| T1    | 0.00                                          |
| T2    | 0.00                                          |
| T3    | 90.00                                         |
| T4    | 100.00                                        |
| EXMOD | non                                           |
| EXPCM | single pulse nondecoupling & nonpresaturation |
| IRNUC | 1H                                            |
| IFR   | 499.10 MHz                                    |
| IRSET | 0.00 KHz                                      |
| IRFIN | 128250.00 Hz                                  |
| IRRPW | 50 usec                                       |
| IRATN | 511                                           |
| DFILE | _DEFAULT.ALS                                  |
| SF    | th5at                                         |
| LKSET | 0.00 KHz                                      |
| LKFIN | 26934.0 Hz                                    |
| LKLEV | 200                                           |
| LGAIN | 20                                            |
| LKPHS | 349                                           |
| LKSIG | 697                                           |
| CSPED | 14 Hz                                         |
| FILDC |                                               |
| FILDF |                                               |
| SLVNT | CDCl3                                         |
| DATIM | Wed Feb 20 15:19:04 2008                      |

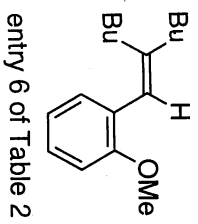

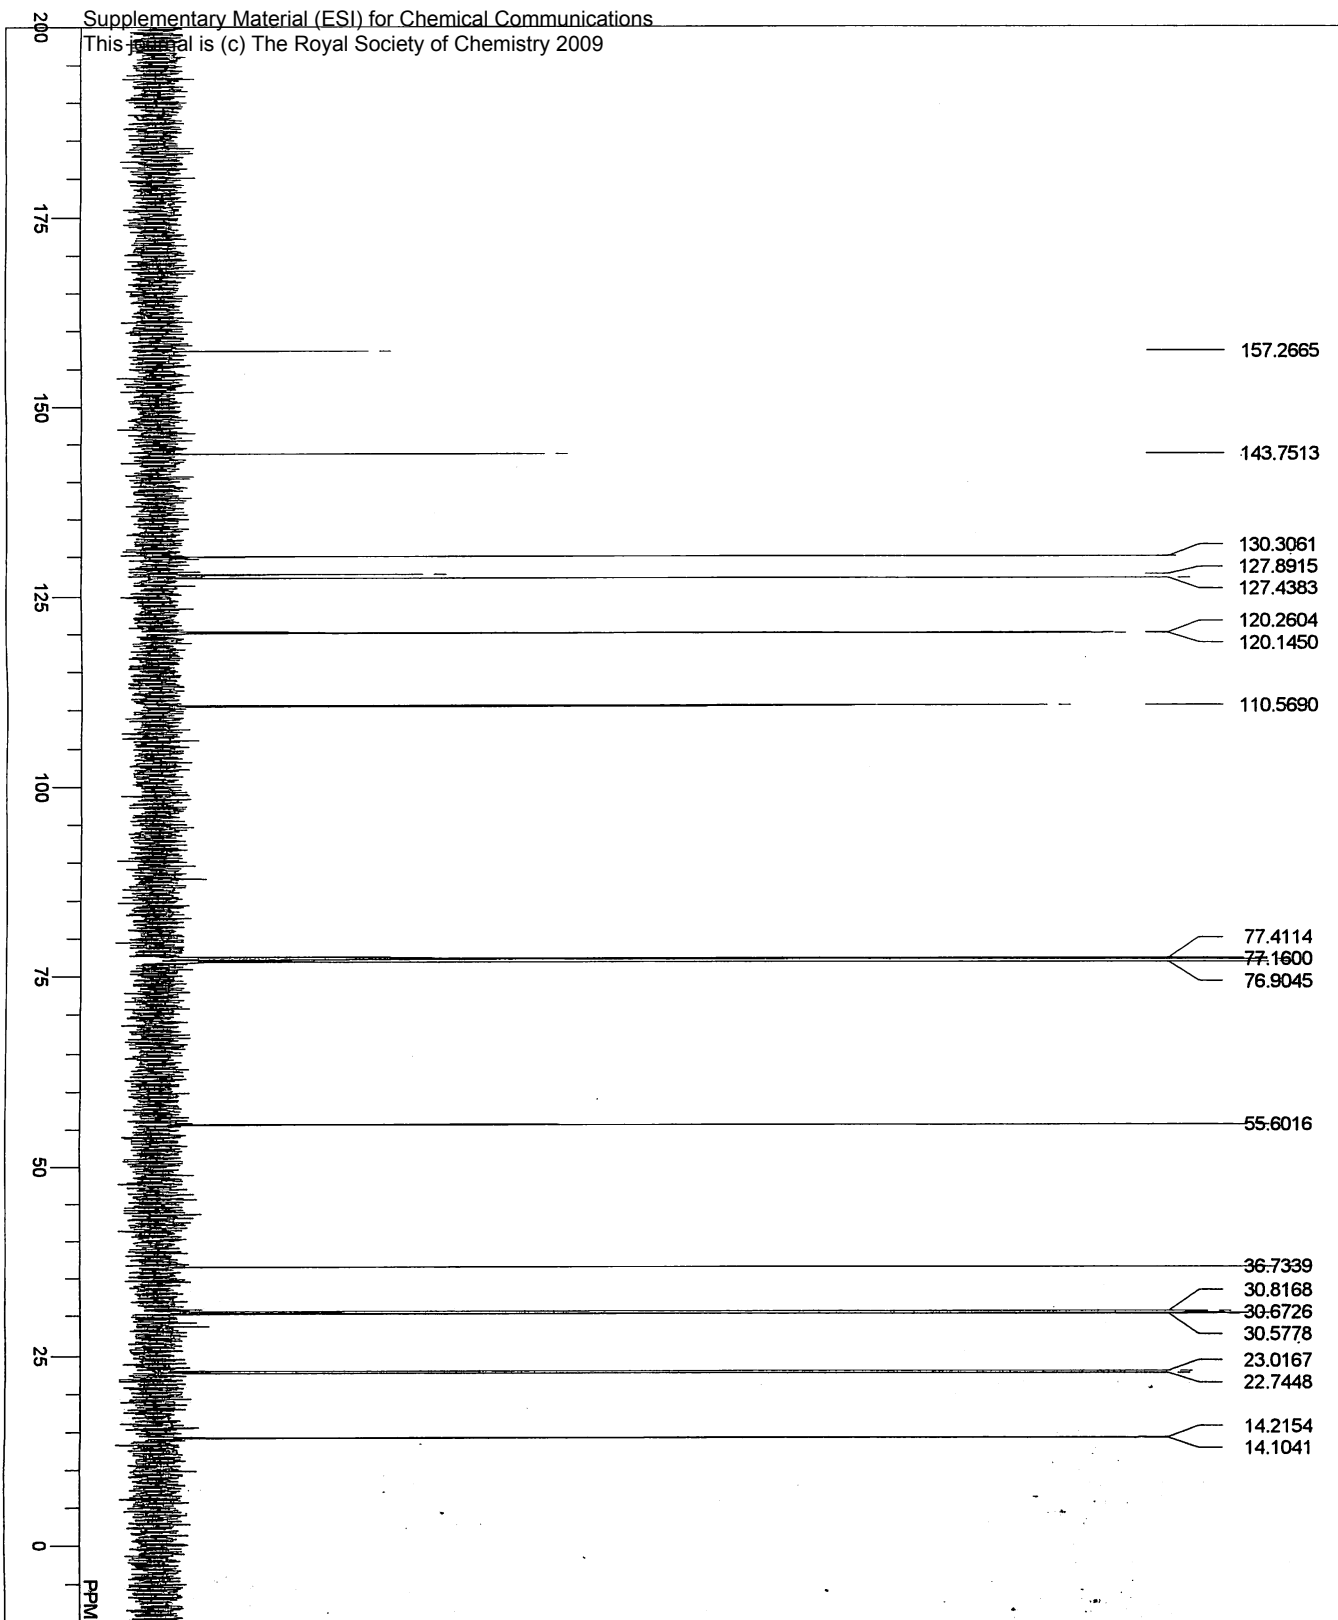

|       |                                      |
|-------|--------------------------------------|
| MENUF | 13C                                  |
| OBNUC | 13C                                  |
| OFFR  | 125.40 MHz                           |
| OBSET | 0.00 KHz                             |
| OBFIN | 143041.00 Hz                         |
| PW1   | 6.25 usec                            |
| DEADT | 10.00 usec                           |
| PREDL | 0.01000 msec                         |
| IMT   | 1000.0000 msec                       |
| POINT | 65536                                |
| SPO   | 65536                                |
| TIMES | 1024                                 |
| DUMMY | 2                                    |
| FRECU | 33898.30 Hz                          |
| FLT   | 16950 Hz                             |
| DELAY | 11.80 usec                           |
| ACQTM | 1.9333 sec                           |
| PD    | 1.0670 sec                           |
| ADBIT | 16                                   |
| RGAIN | 30                                   |
| BF    | 1.20 Hz                              |
| T1    | 0.00                                 |
| T2    | 0.00                                 |
| T3    | 90.00                                |
| T4    | 100.00                               |
| EXMOD | hnm                                  |
| EXPCM | single pulse with bilevel decoupling |
| IRNUC | 1H                                   |
| IR    | 499.10 MHz                           |
| IRSET | 0.00 KHz                             |
| IRFIN | 128250.00 Hz                         |
| IRRPW | 50 usec                              |
| IRATN | 511                                  |
| DFILE | _DEFAULT.ALS                         |
| SF    | th5at                                |
| LKSET | 0.00 KHz                             |
| LKFIN | 26934.0 Hz                           |
| LKLEV | 200                                  |
| LGAIN | 23                                   |
| LKPHS | 349                                  |
| LKSIG | 1407                                 |
| CSPED | 14 Hz                                |
| FILDF |                                      |
| SLVNT | CDCl3                                |
| DATIM | Wed Feb 20 14:24:25 2008             |

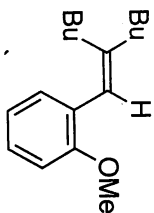

entry 6 of Table 2

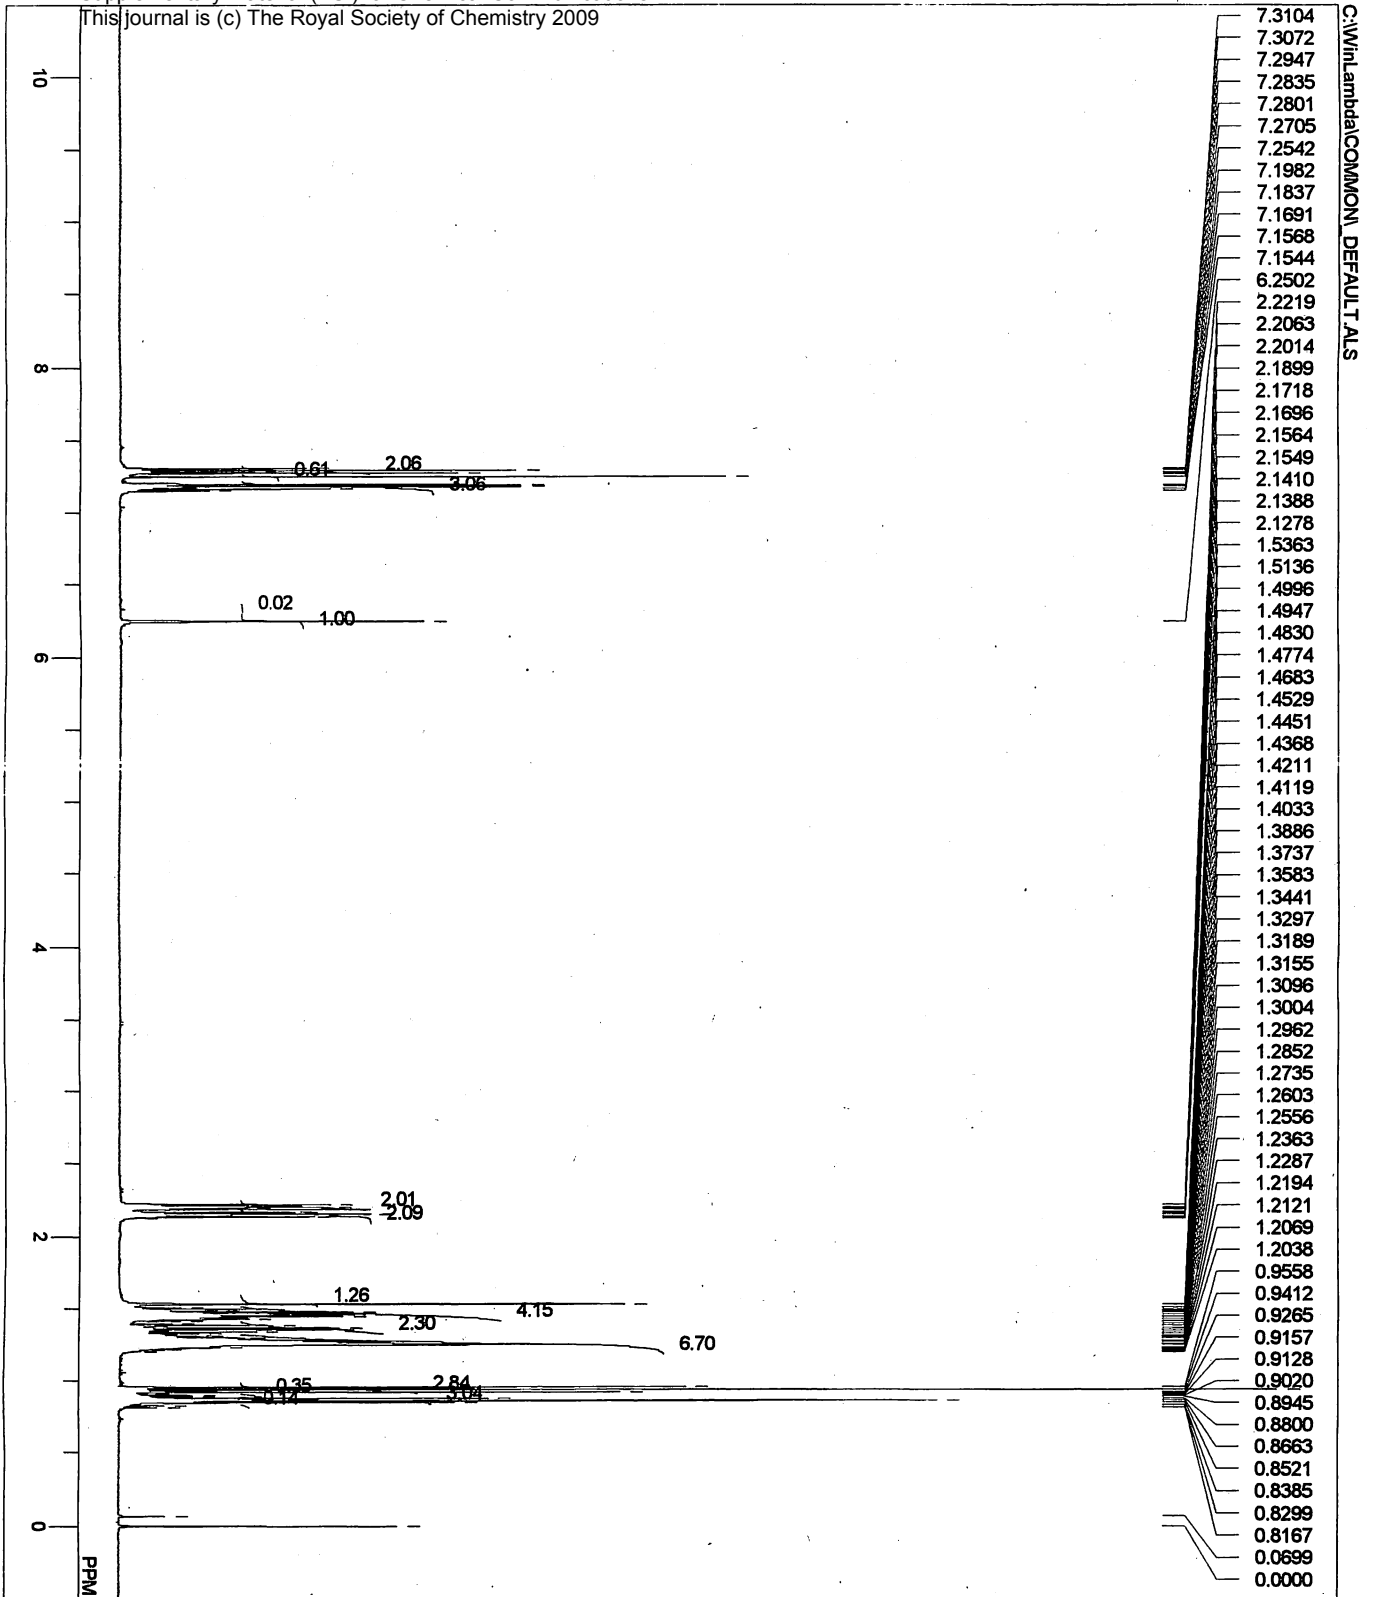

C:\WIn\lambda\data\COMMON\_DEFAULT.ALS

| MENU  | 1H                                             |
|-------|------------------------------------------------|
| OBNUC | 1H                                             |
| OFR   | 499.10 MHz                                     |
| OBSET | 0.00 KHz                                       |
| OBFIN | 128885.00 Hz                                   |
| PW1   | 5.50 usec                                      |
| DEADT | 72.30 usec                                     |
| PREDL | 0.01000 msec                                   |
| IWT   | 1000.0000 msec                                 |
| POINT | 65536                                          |
| SPO   | 65536                                          |
| TIMES | 16                                             |
| DUMMY | 0                                              |
| FREQU | 8000.00 Hz                                     |
| FLT   | 4000 Hz                                        |
| DELAY | 50.00 usec                                     |
| ACQTM | 8.1920 sec                                     |
| PD    | 1.0000 sec                                     |
| ADBIT | 16                                             |
| RGAIN | 22                                             |
| BF    | 0.12 Hz                                        |
| T1    | 0.00                                           |
| T2    | 0.00                                           |
| T3    | 90.00                                          |
| T4    | 100.00                                         |
| EXMOD | non                                            |
| EXPCM | single pulse nondecoupling & nonpressaturation |
| IRNUC | 1H                                             |
| IFR   | 499.10 MHz                                     |
| IRSET | 0.00 KHz                                       |
| IRFIN | 128250.00 Hz                                   |
| IRRPW | 50 usec                                        |
| IRATN | 511                                            |
| DFILE | _DEFAULT.ALS                                   |
| SF    | thisat                                         |
| LKSET | 0.00 KHz                                       |
| LKFIN | 26934.0 Hz                                     |
| LKLEV | 200                                            |
| LGAIN | 20                                             |
| LKPHS | 353                                            |
| LKSIG | 573                                            |
| CSPED | 13 Hz                                          |
| FILDG |                                                |
| SLVNT | CDCl3                                          |
| DATIM | Fri Nov 14 00:02:58 2008                       |

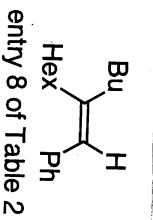

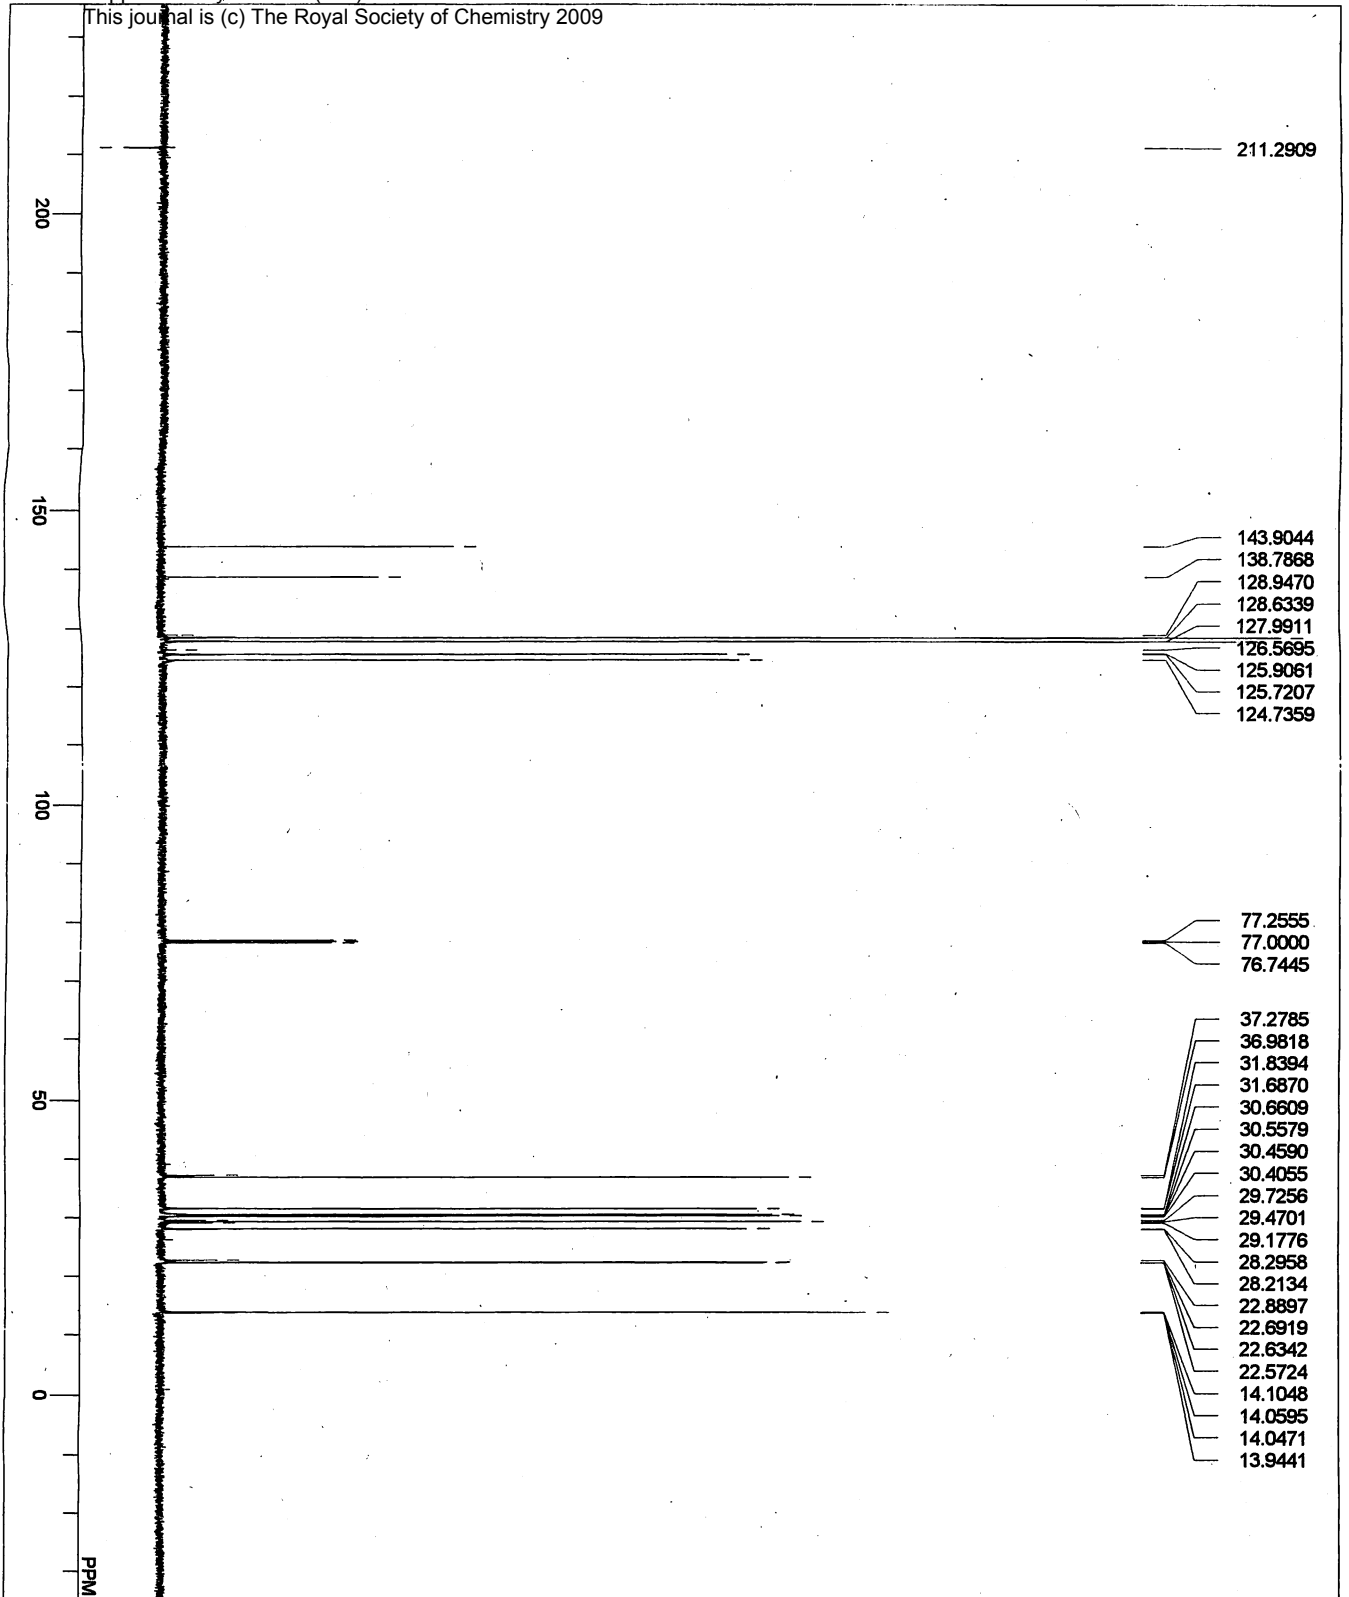

MNUF 13C  
 OBNUC 13C  
 OFR 125.40 MHz  
 OBSET 0.00 KHz  
 OBFIN 143041.00 Hz  
 PW1 6.25 usec  
 DEADT 10.00 usec  
 PREDL 0.010000 msec  
 IWT 1000.0000 msec  
 POINT 65536  
 SPO 65536  
 TIMES 128  
 DUMNY 2  
 FREQU 33898.30 Hz  
 FLT 16950 Hz  
 DELAY 11.80 usec  
 ACQTM 1.9333 sec  
 PD 1.0670 sec  
 ADBIT 16  
 RGAIN 29  
 BF 1.20 Hz  
 T1 0.00  
 T2 0.00  
 T3 90.00  
 T4 100.00  
 EXMOD bnm  
 EXPCM single pulse with bilevel decoupling  
 IRNUC 1H  
 IFR 499.10 MHz  
 IRSET 0.00 KHz  
 IRFIN 128250.00 Hz  
 IRRPW 50 usec  
 IRATN 511  
 DFILE \_DEFAULT.ALS  
 SF thsat  
 LKSET 0.00 KHz  
 LKTIN 26934.0 Hz  
 LKLEV 200  
 LGAIN 19  
 LKPHS 353  
 LKSIG 582  
 CSPED 14 Hz  
 FLDC  
 FLDF  
 SLVNT  
 DATIM  
 CDCL3  
 Fft Nov 14 13:17:15 2008

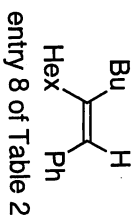

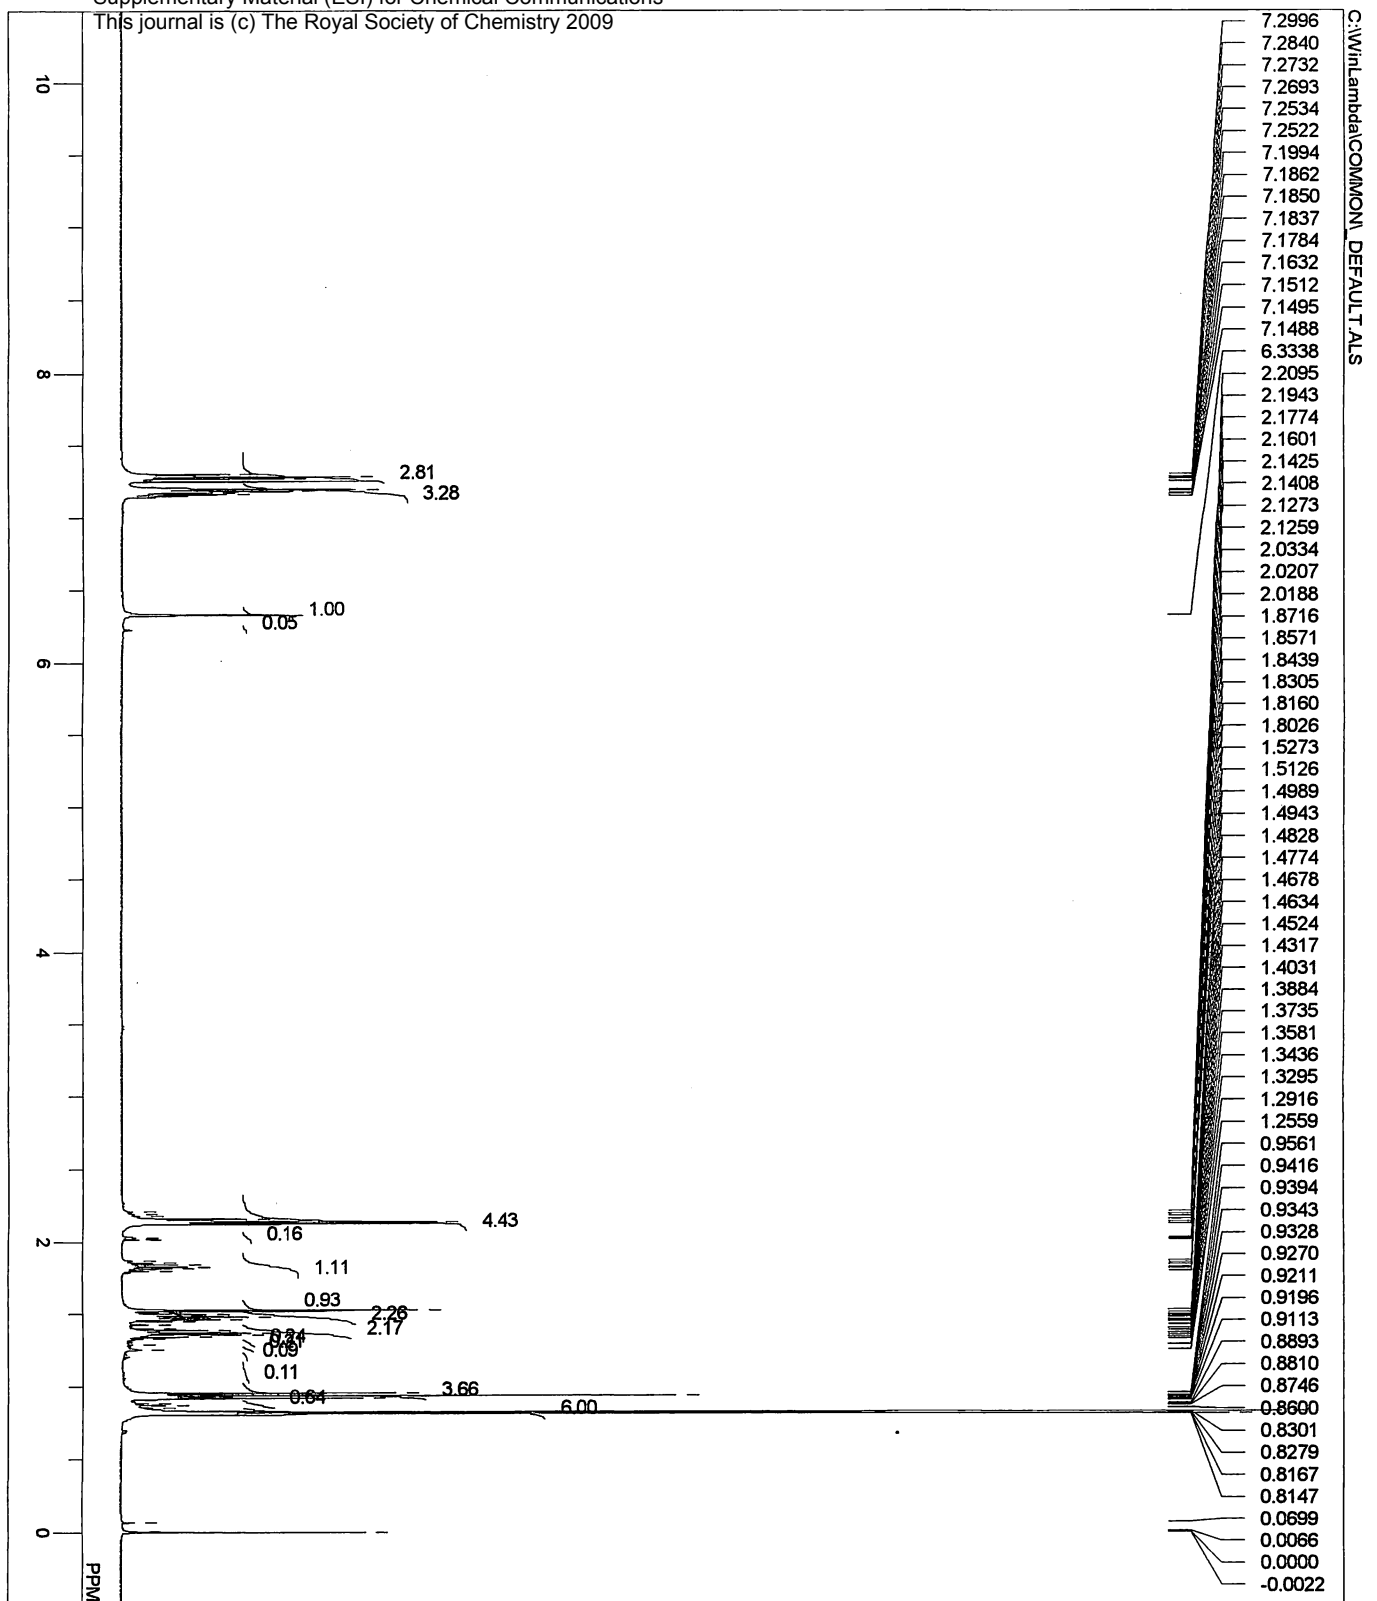

MENUF 1H  
 OBRNUC 1H  
 OFR 499.10 MHz  
 OBSSET 0.00 KHz  
 OBFIN 128885.00 Hz  
 PW1 5.50 usec  
 DEADT 72.30 usec  
 PREDL 0.07000 msec  
 IWT 1000.0000 msec  
 POINT 65536  
 SPO 65536  
 TIMES 16  
 DUMINY 0  
 FREQU 8000.00 Hz  
 FLT 4000 Hz  
 DELAY 50.00 usec  
 ACQTM 8.1920 sec  
 PD 1.0000 sec  
 ADBIT 16  
 RGAIN 22  
 BF 0.12 Hz  
 T1 0.00  
 T2 0.00  
 T3 90.00  
 T4 100.00  
 EXMOD non  
 EXPCM single pulse nondecoupling & nonpresaturator  
 IRNUC 1H  
 IFR 499.10 MHz  
 IRSET 0.00 KHz  
 IRFIN 128250.00 Hz  
 IRRPW 50 usec  
 IRATN 511  
 DFILE \_DEFAULT.ALS  
 SF thisat  
 LKSET 0.00 KHz  
 LKFIN 26934.0 Hz  
 LKLEV 200  
 LGAIN 21  
 LKPHS 353  
 LKSIG 643  
 CSPED 10 Hz  
 FILDG  
 FILDF  
 SLVNT  
 DATM

CDCl3  
 Sat May 17 18:58:31 2008

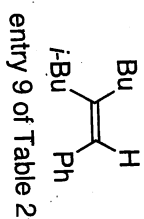

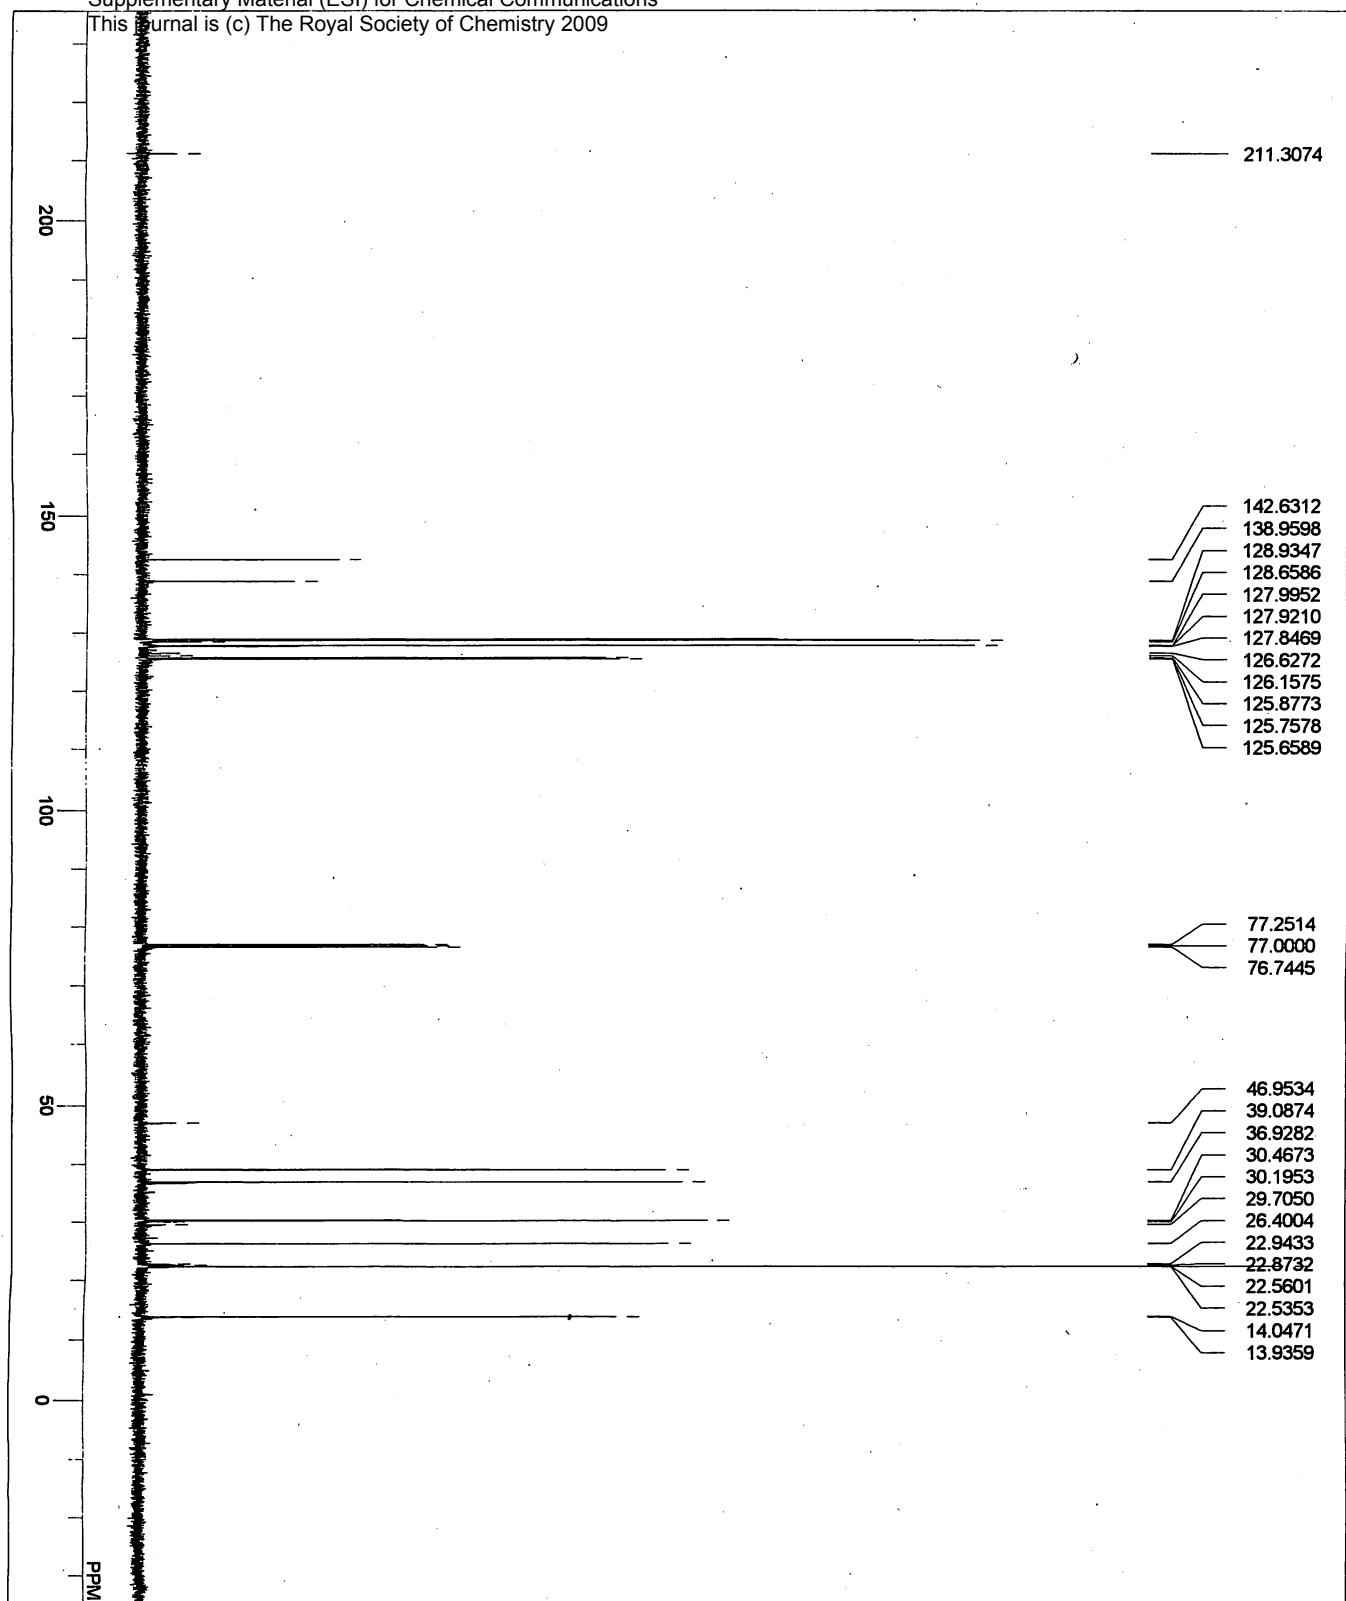

MENUF 13C  
 OBNUC 13C  
 OFR 125.40 MHz  
 OBSET 0.00 KHz  
 OBFIN 143041.00 Hz  
 PW1 6.25 usec  
 DEADT 10.00 usec  
 PREDL 0.01000 msec  
 IWT 1000.0000 msec  
 POINT 65536  
 SPO 65536  
 TIMES 128  
 DUMMY 2  
 FREQU 33896.30 Hz  
 FLT 16950 Hz  
 DELAY 11.80 usec  
 ACQTM 1.9333 sec  
 PD 1.0670 sec  
 ADBIT 16  
 RGAIN 31  
 BF 1.20 Hz  
 T1 0.00  
 T2 0.00  
 T3 90.00  
 T4 100.00  
 EXMOD bnm  
 EXPCM single pulse with bilvel decoupling  
 IRNUC 1H  
 IFR 499.10 MHz  
 IRSET 0.00 KHz  
 IRFIN 128250.00 Hz  
 IRRPW 50 usec  
 IRATN 511  
 DFILE d:\4019co\13C.a1s  
 SF thsat  
 LKSET 0.00 KHz  
 LKFIN 26934.0 Hz  
 LKLEV 200  
 LGAIN 19  
 LKPHS 353  
 LKSIG 671  
 CSPED 12 Hz

CDCl3  
 F1 Nov 14 13:09:11 2008

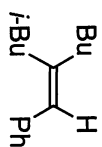



C:\Personal\ldiked\dl17030co.als

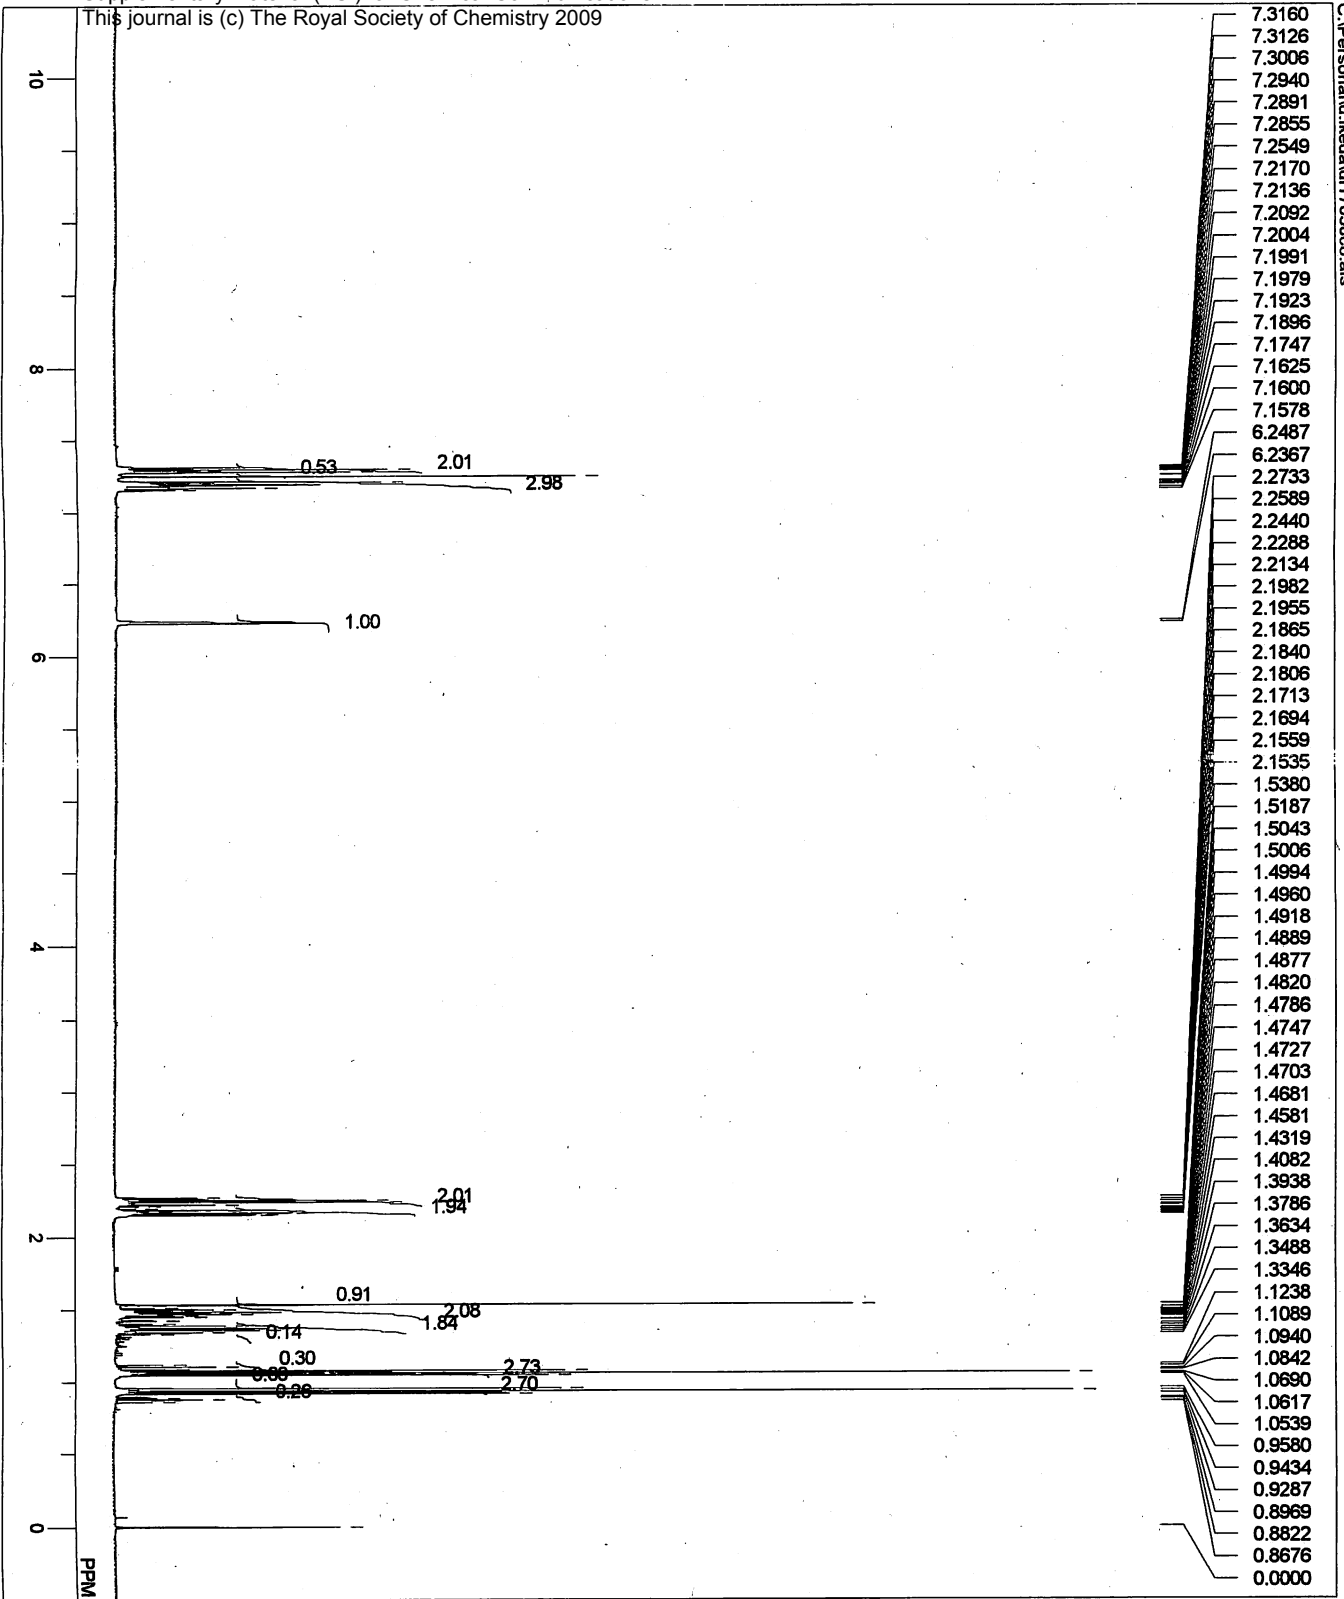

|        |                                               |  |
|--------|-----------------------------------------------|--|
| MENUF  | 1H                                            |  |
| OBNUC  | 1H                                            |  |
| OFR    | 499.10 MHz                                    |  |
| OBSET  | 0.00 KHz                                      |  |
| OBFIN  | 128885.00 Hz                                  |  |
| PW1    | 5.50 usec                                     |  |
| DEADT  | 72.30 usec                                    |  |
| PREDL  | 0.01000 msec                                  |  |
| IWT    | 1000.0000 msec                                |  |
| POINT  | 65536                                         |  |
| SPO    | 65536                                         |  |
| DUMMY  | 16                                            |  |
| FREQU  | 8000.00 Hz                                    |  |
| FLT    | 4000 Hz                                       |  |
| DELAY  | 50.00 usec                                    |  |
| ACQTM  | 8.1920 sec                                    |  |
| PD     | 1.0000 sec                                    |  |
| ADBIT  | 16                                            |  |
| RGAIN  | 22                                            |  |
| BF     | 0.12 Hz                                       |  |
| T1     | 0.00                                          |  |
| T2     | 0.00                                          |  |
| T3     | 90.00                                         |  |
| T4     | 100.00                                        |  |
| EXMOD  | non                                           |  |
| EXPM   | single pulse nondecoupling & nonpresaturation |  |
| IRNUC  | 1H                                            |  |
| IFR    | 499.10 MHz                                    |  |
| IRSET  | 0.00 KHz                                      |  |
| IRFIN  | 128250.00 Hz                                  |  |
| IRPW   | 50 usec                                       |  |
| IRATN  | 511                                           |  |
| DFILE  | dl17030co.als                                 |  |
| SF     | th5at                                         |  |
| LKSET  | 0.00 KHz                                      |  |
| LKFIN  | 26934.0 Hz                                    |  |
| LKLEV  | 200                                           |  |
| LGAIN  | 19                                            |  |
| LKPHS  | 353                                           |  |
| LKSG   | 650                                           |  |
| CSPED  | 12 Hz                                         |  |
| FILDC  |                                               |  |
| FILDF  |                                               |  |
| SILVNT |                                               |  |
| DATIM  |                                               |  |
| CDCL3  |                                               |  |
|        | Thu Nov 27 10:31:59 2008                      |  |

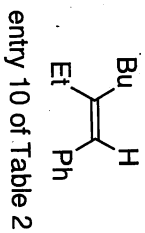

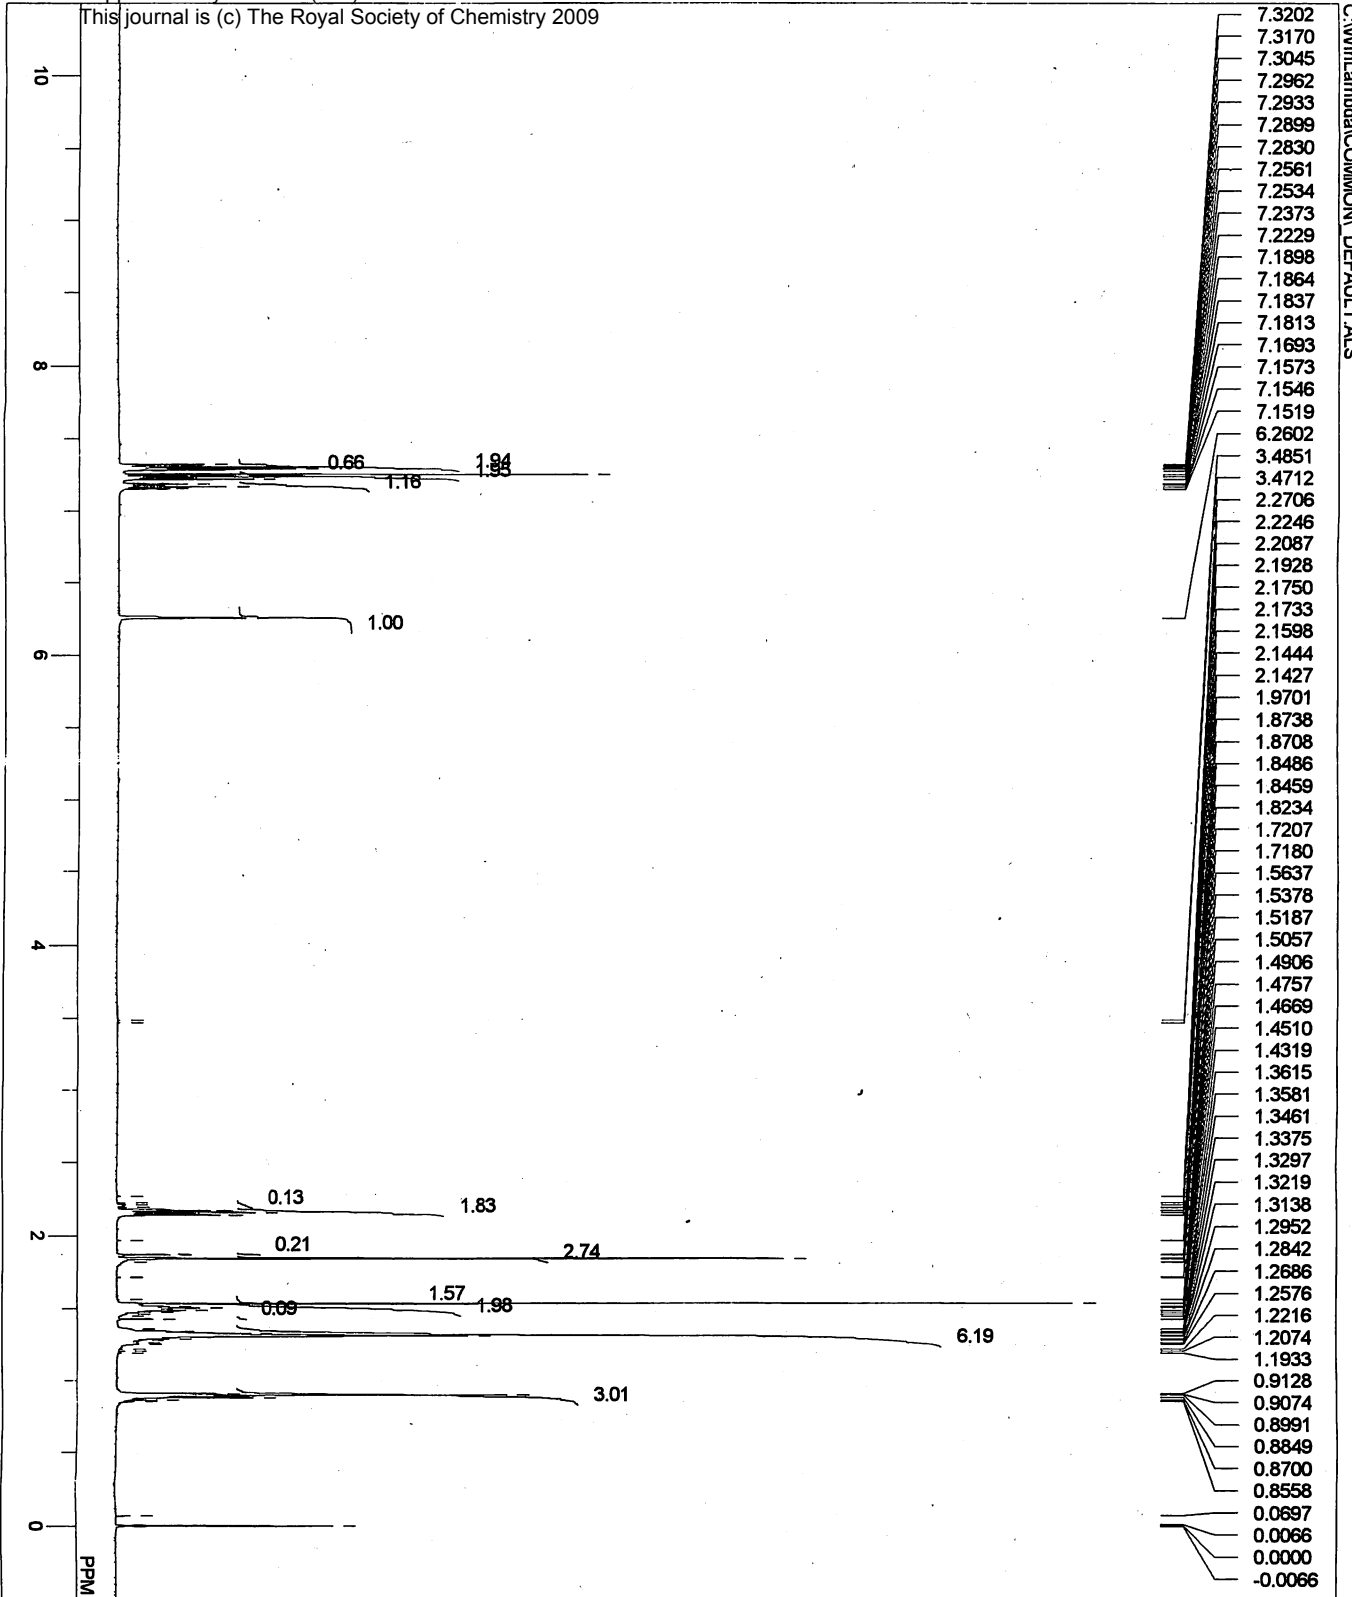

| MENU  | 1H                                            | 1H |
|-------|-----------------------------------------------|----|
| OBNUC | 499.10 MHz                                    |    |
| OFR   | 0.00 KHz                                      |    |
| OBSET | 128885.00 Hz                                  |    |
| OBFIN | 5.50 usec                                     |    |
| PW1   | 72.30 usec                                    |    |
| DEADT | 0.010000 msec                                 |    |
| PREDL | 1000.00000 msec                               |    |
| MT    | 65536                                         |    |
| POINT | 65536                                         |    |
| SPO   | 16                                            |    |
| TIMES | 0                                             |    |
| DUMNY | 8000.00 Hz                                    |    |
| FREQU | 4000 Hz                                       |    |
| FLT   | 50.00 usec                                    |    |
| DELAY | 8.1920 sec                                    |    |
| ACQTM | 1.0000 sec                                    |    |
| PD    | 16                                            |    |
| ADBIT | 23                                            |    |
| RGAIN | 0.12 Hz                                       |    |
| BF    | 0.00                                          |    |
| T1    | 0.00                                          |    |
| T2    | 90.00                                         |    |
| T3    | 100.00                                        |    |
| T4    |                                               |    |
| EXMOD | non                                           |    |
| EXPCM | single pulse nondecoupling & nonpresaturation |    |
| IRNUC | 1H                                            |    |
| FR    | 499.10 MHz                                    |    |
| IRSET | 0.00 KHz                                      |    |
| IRFIN | 128250.00 Hz                                  |    |
| IRRPW | 50 usec                                       |    |
| IRATN | 511                                           |    |
| DFILE | _DEFAULTS                                     |    |
| SF    | thsat                                         |    |
| LKSET | 0.00 KHz                                      |    |
| LKFIN | 26934.0 Hz                                    |    |
| LKLEV | 200                                           |    |
| LGAIN | 20                                            |    |
| LKPHS | 353                                           |    |
| LKSIG | 679                                           |    |
| CSPED | 12 Hz                                         |    |
| FLDC  |                                               |    |
| FLDF  |                                               |    |
| SLVNT | CDCl3                                         |    |
| DATIM | Fri Nov 14 23:30:18 2008                      |    |

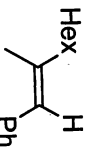

entry 11 of Table 2

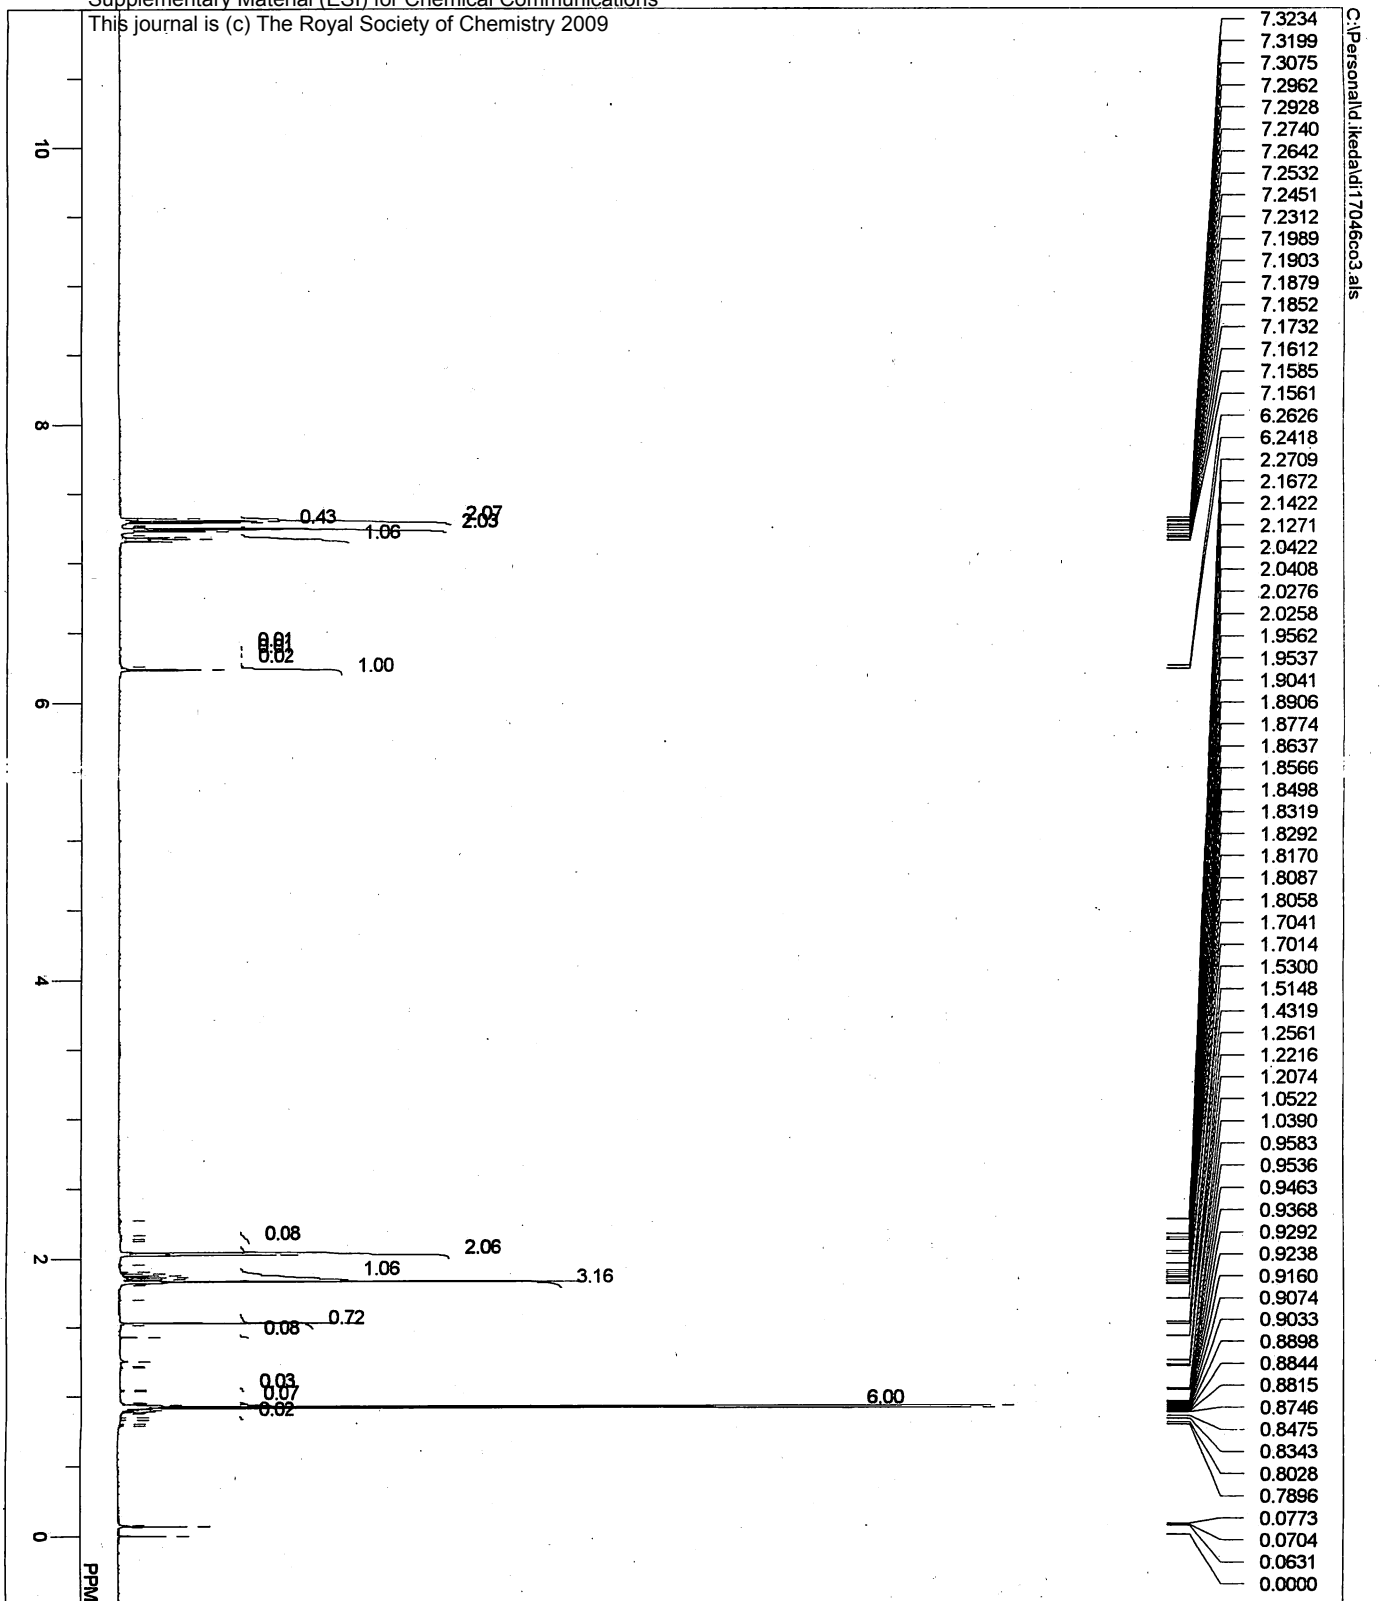

MENUP 1H  
 OBNUC 1H  
 OFR 499.10 MHz  
 OBSSET 0.00 KHz  
 OBFIN 129885.00 Hz  
 PWT 5.50 usec  
 DEADT 72.30 usec  
 PREDL 0.010000 msec  
 IWT 1000.0000 msec  
 POINT 65536  
 SPO 65536  
 TIMES 16  
 DUMNY 0  
 FREQU 8000.00 Hz  
 FLT 4000 Hz  
 DELAY 50.00 usec  
 ACQTM 8.1920 sec  
 PD 1.0000 sec  
 ADBI 16  
 RGAIN 22  
 BF 0.12 Hz  
 T1 0.00  
 T2 0.00  
 T3 90.00  
 T4 100.00  
 EXMOD non  
 EXPCM single pulse nondecoupling & nonpresaturation  
 IRNUC 1H  
 IFR 499.10 MHz  
 IRSET 0.00 KHz  
 IRFIN 128250.00 Hz  
 IRRPW 50 usec  
 IRATN 511  
 DFILE d:\17046c03.als  
 SF thsat  
 LKSET 0.00 KHz  
 LKFIN 26934.0 Hz  
 LKLEV 200  
 LGAIN 24  
 LKPHS 353  
 LKSIG 731  
 CSPED 11 Hz  
 FLDC  
 FLDF  
 SLVNT  
 DATIM  
 CDCl3  
 Tue Dec 02 15:05:58 2008

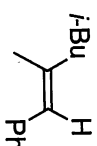

entry 12 of Table 2

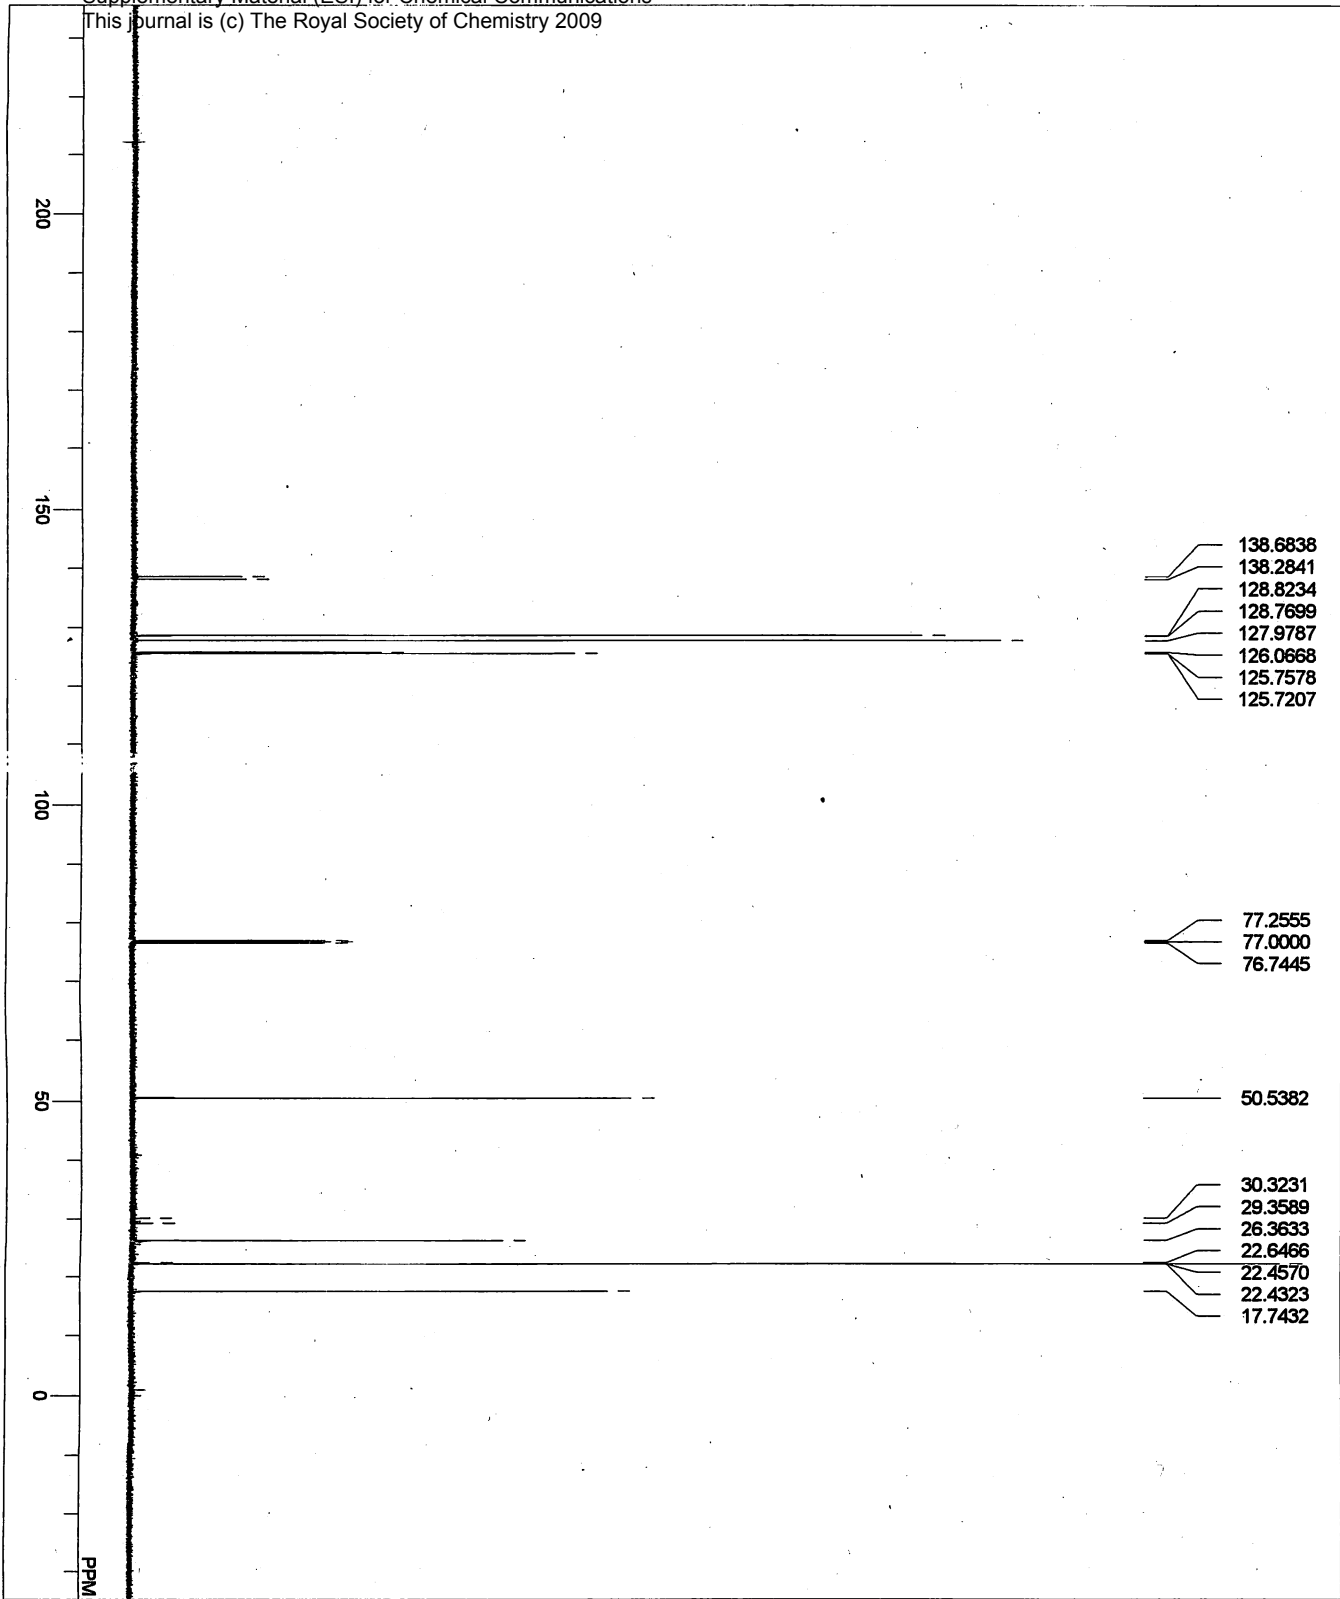

MENUF 13C  
 ONBUC 13C  
 OFR 125.40 MHz  
 OBSET 0.00 KHz  
 OBFIN 143041.00 Hz  
 PWM1 6.25 usec  
 DEADT 10.00 usec  
 PREDL 0.01000 msec  
 WLT 1000.0000 msec  
 POINT 65536  
 SPO 65536  
 TIMES 1024  
 DUMINY 2  
 FREQU 33898.30 Hz  
 FLT 16950 Hz  
 DELAY 11.80 usec  
 ACQTM 1.9333 sec  
 PD 1.0670 sec  
 ADBIT 16  
 RGAIN 30  
 BF 0.12 Hz  
 T1 0.00  
 T2 0.00  
 T3 90.00  
 T4 100.00  
 EXMOD bnm  
 EXPCM single pulse with bilvel decoupling  
 IRNUC 1H  
 IFR 499.10 MHz  
 IRSET 0.00 KHz  
 IRFIN 128250.00 Hz  
 IRRPW 50 usec  
 IRATN 511  
 DFILE \_DEFAULT.ALS  
 SF thsat  
 LKSET 0.00 KHz  
 LKFIN 26934.0 Hz  
 LKLEV 200  
 LGAIN 22  
 LKPHS 353  
 LKSIG 1130  
 CSPED 11 Hz  
 FILDC  
 FILDF  
 SILVNT  
 DATIM

CDCL3  
 Thu Dec 11 00:57:16 2008

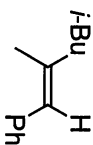

entry 12 of Table 2

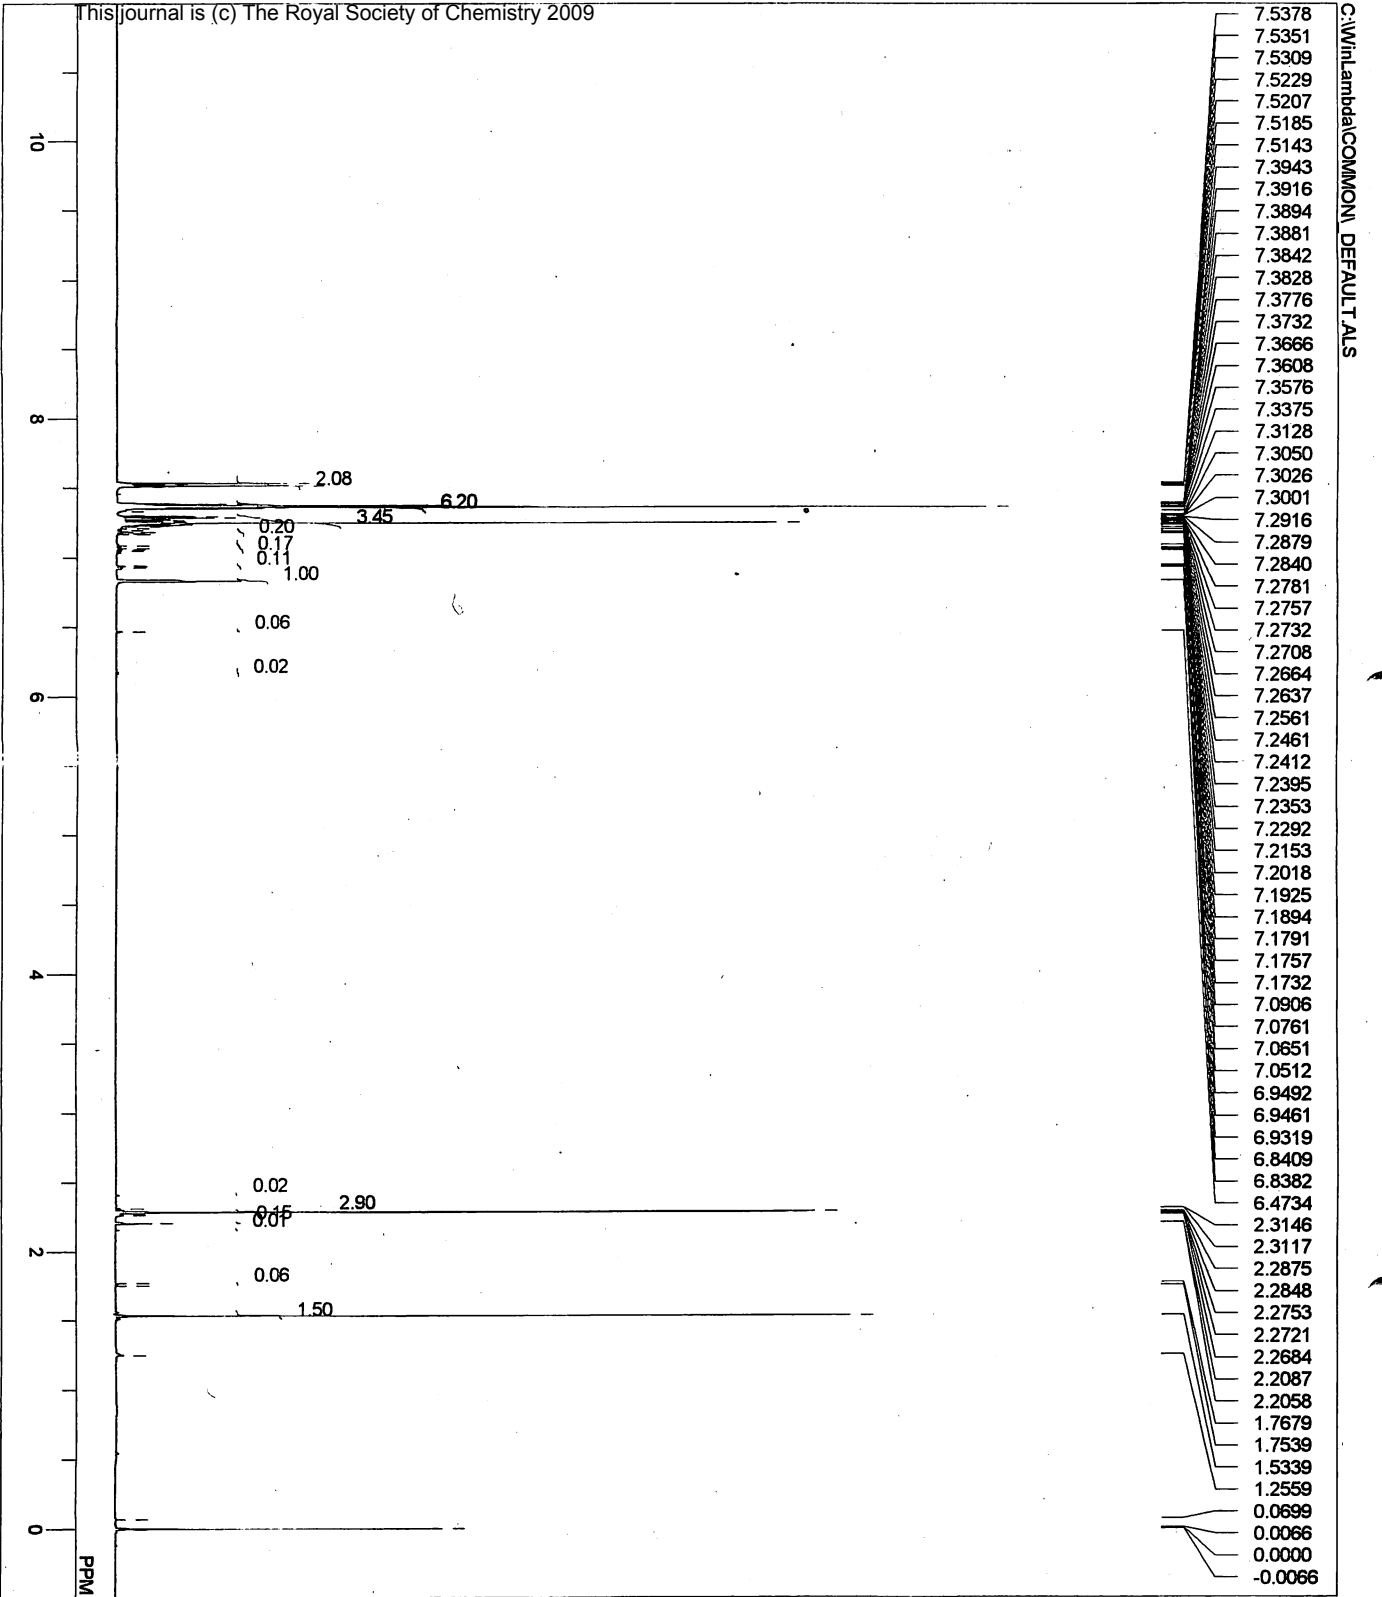

MENU  
 OFF 1H  
 OBSET 499.10 MHz  
 OBFIN 0.00 KHz  
 PW1 128885.00 Hz  
 5.50 usec  
 DEADT 72.30 usec  
 PREDL 0.01000 msec  
 IWT 1000.0000 msec  
 POINT 65536  
 SPO 65536  
 TIMES 16  
 DUMMY 0  
 FREQ 8000.00 Hz  
 FLT 4000 Hz  
 DELAY 50.00 usec  
 ACQTM 8.1920 sec  
 PD 1.0000 sec  
 ADBIT 16  
 RGAIN 26  
 BF 0.12 Hz  
 T1 0.00  
 T2 0.00  
 T3 90.00  
 T4 100.00  
 EXMOD non  
 single pulse nondecoupling & nonpresaturation  
 1H  
 IRRNUC 499.10 MHz  
 IRRSET 0.00 KHz  
 IRRFIN 128250.00 Hz  
 IRRPV 50 usec  
 IRATN 511  
 DFILE  
 \_DEFAULTS  
 tftbat  
 SF 0.00 KHz  
 LKSET 26934.0 Hz  
 LKFIN 200  
 LKLEV 19  
 LGAIN 353  
 LKPHS 1156  
 LKSIG 11 Hz  
 CSPED  
 FILDC  
 FILDF  
 SLVNT CDCL3  
 DATM Tue-Jan 06 14:48:53 2009

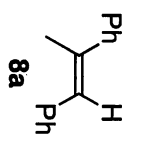

C:\WIn\lambda\data\COMMON\_DEFAULT.ALS

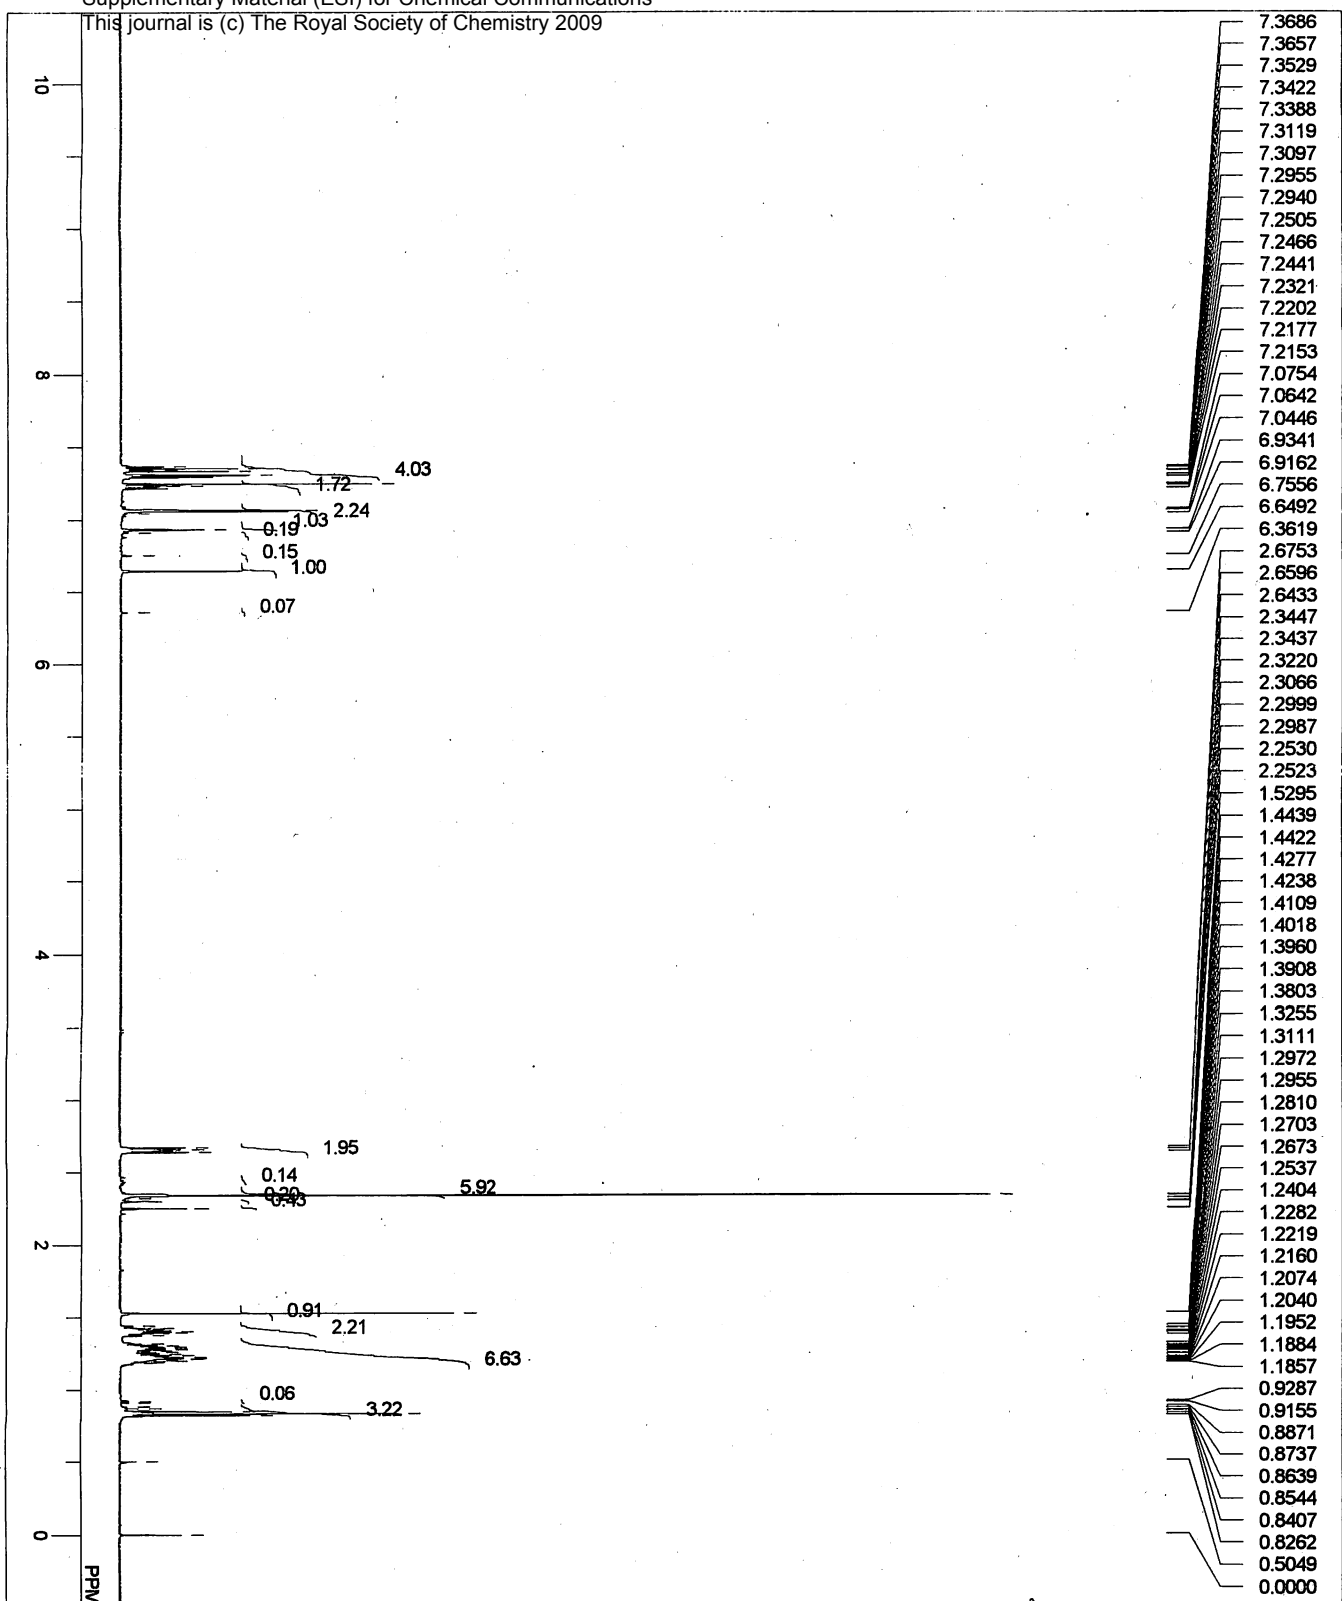

MNAME 1H  
 OBNAME 1H  
 OFR 499.10 MHz  
 OBSSET 0.00 KHz  
 OFBIN 128885.00 Hz  
 PW1 5.50 usec  
 DEADT 72.30 usec  
 PREDL 0.01000 msec  
 WWT 1000.0000 msec  
 POINT 65536  
 SPO 65536  
 TIMES 16  
 DUMMY 0  
 FREQ 8000.00 Hz  
 FLT 4000 Hz  
 DELAY 50.00 usec  
 ACQTM 8.1920 sec  
 PD 1.0000 sec  
 ADBIT 16  
 RGAIN 22  
 BF 0.12 Hz  
 T1 0.00  
 T2 0.00  
 T3 90.00  
 T4 100.00  
 EXMOD non  
 EXPCM single pulse nondecoupling & nonpresaturation  
 IRNUC 1H  
 IFR 499.10 MHz  
 IRSET 0.00 KHz  
 IRFIN 128250.00 Hz  
 IRRPW 50 usec  
 IRATN 511  
 DFLD DEFAULT.ALS  
 SF thesat  
 LKSET 0.00 KHz  
 LKFIN 26934.0 Hz  
 LKLEV 200  
 LGAIN 19  
 LKPHS 353  
 LKSIG 585  
 CSPED 10 Hz  
 FILDC  
 SLVNT CDCL3  
 DATM Wed Dec 03 13:37:10 2008

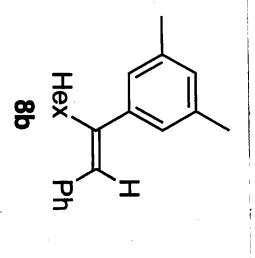

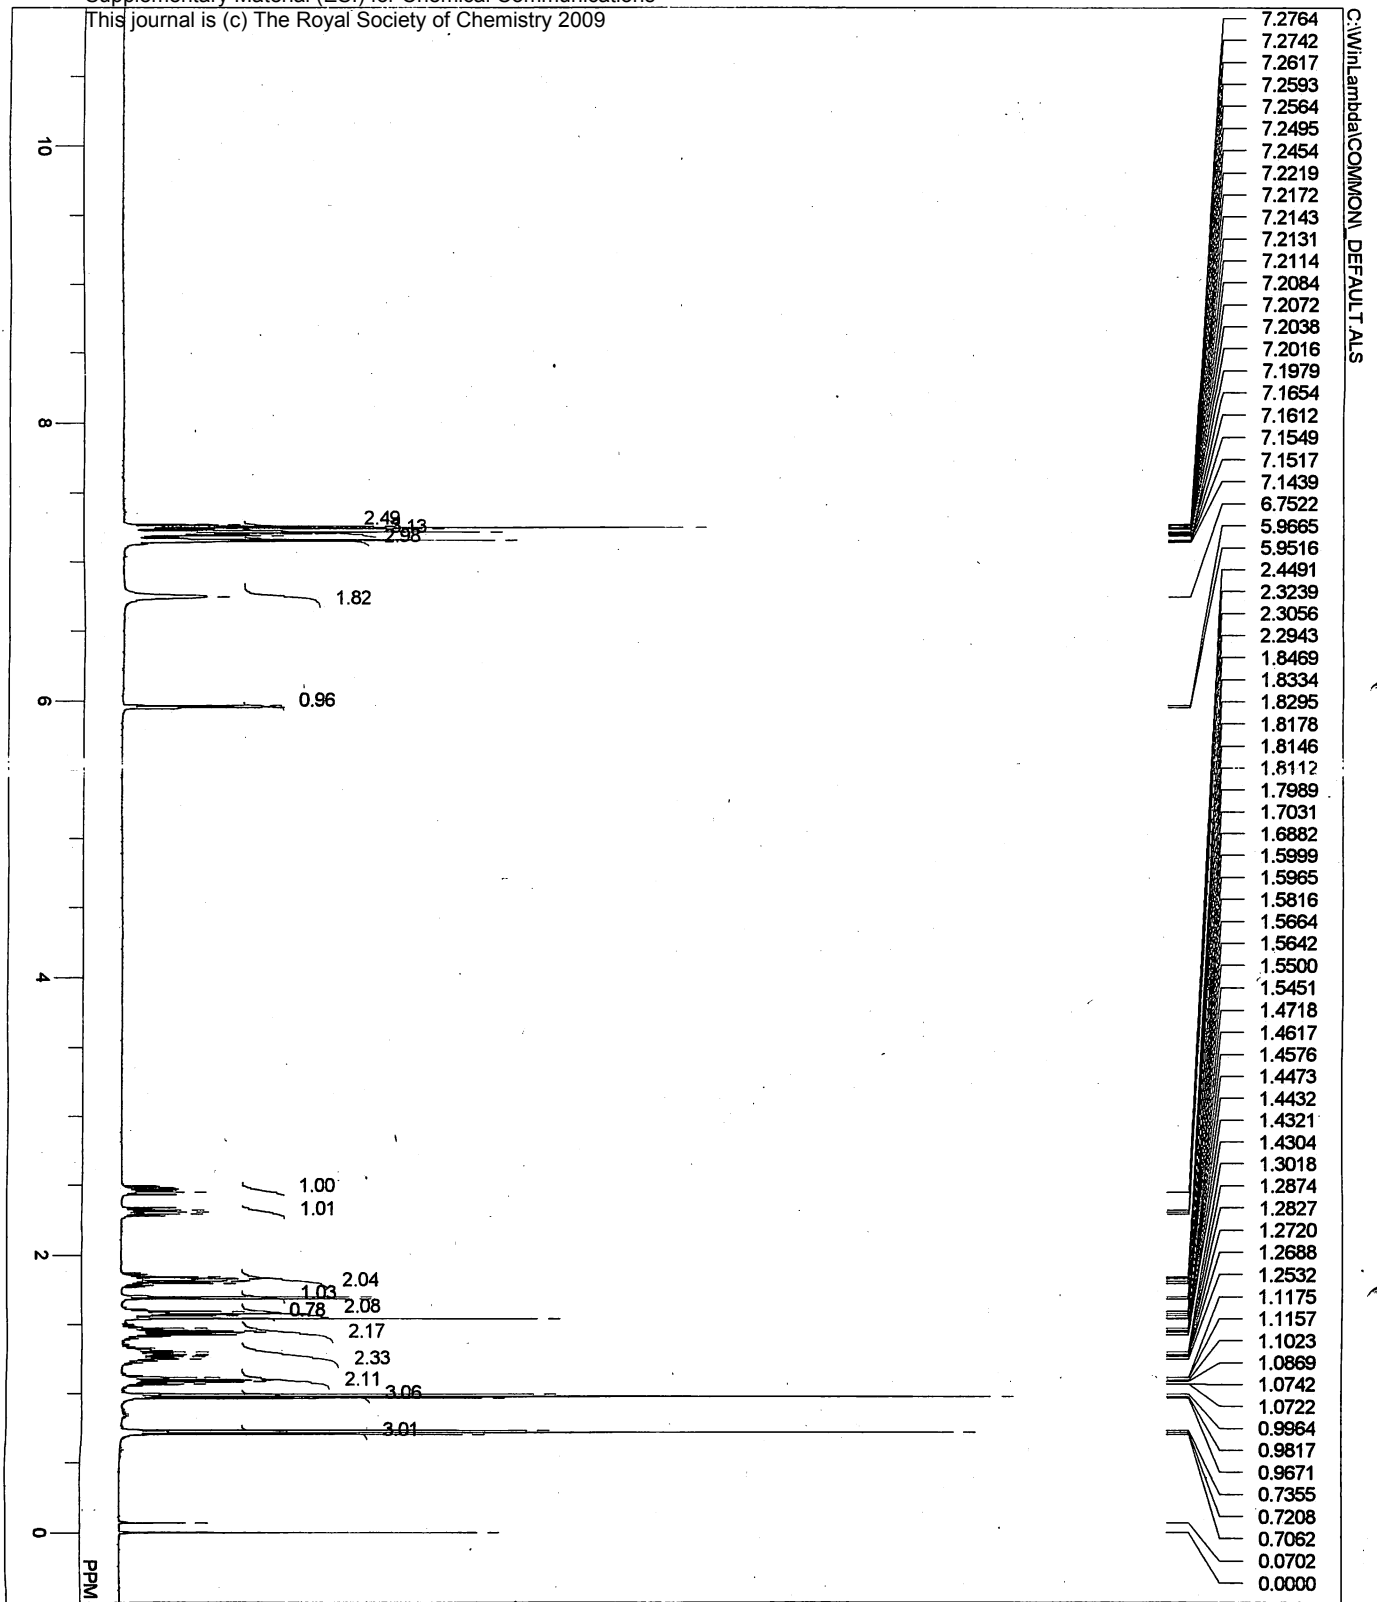

MENUF 1H  
 OBRN 1H  
 OBSBT 499.10 MHz  
 OBFIN 0.00 KHz  
 PM1 129885.00 Hz  
 DEADT 5.50 usec  
 PREDL 72.30 usec  
 IWT 0.010000 msec  
 POINT 1000.0000 msec  
 SPO 65536  
 DUMNY 16  
 TIMES 0  
 FREQU 8000.00 Hz  
 FLT 4000 Hz  
 DELAY 50.00 usec  
 ACQTM 8.1920 sec  
 PD 1.0000 sec  
 ADRIT 16  
 RGAIN 22  
 BF 0.12 Hz  
 T1 0.00  
 T2 0.00  
 T3 90.00  
 T4 100.00  
 EXMOD non  
 EXPCAM single pulse nondecoupling & nonpresaturation  
 IRNUC 1H  
 IFR 499.10 MHz  
 IRSET 0.00 KHz  
 IRFIN 128250.00 Hz  
 IRRPW 50 usec  
 IRATN 511  
 DFILE \_DEFAULT.ALS  
 SF tHsat  
 LKSET 0.00 KHz  
 LKFIN 26934.0 Hz  
 LKLEV 200  
 LGAIN 24  
 LKPHS 353  
 LKSIG 2056  
 CSPED 11 Hz  
 FLUDC  
 FLIDF  
 SLVNT CDCl3  
 DATM Tue Jan 06 00:33:55 2009

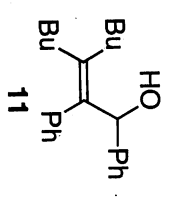

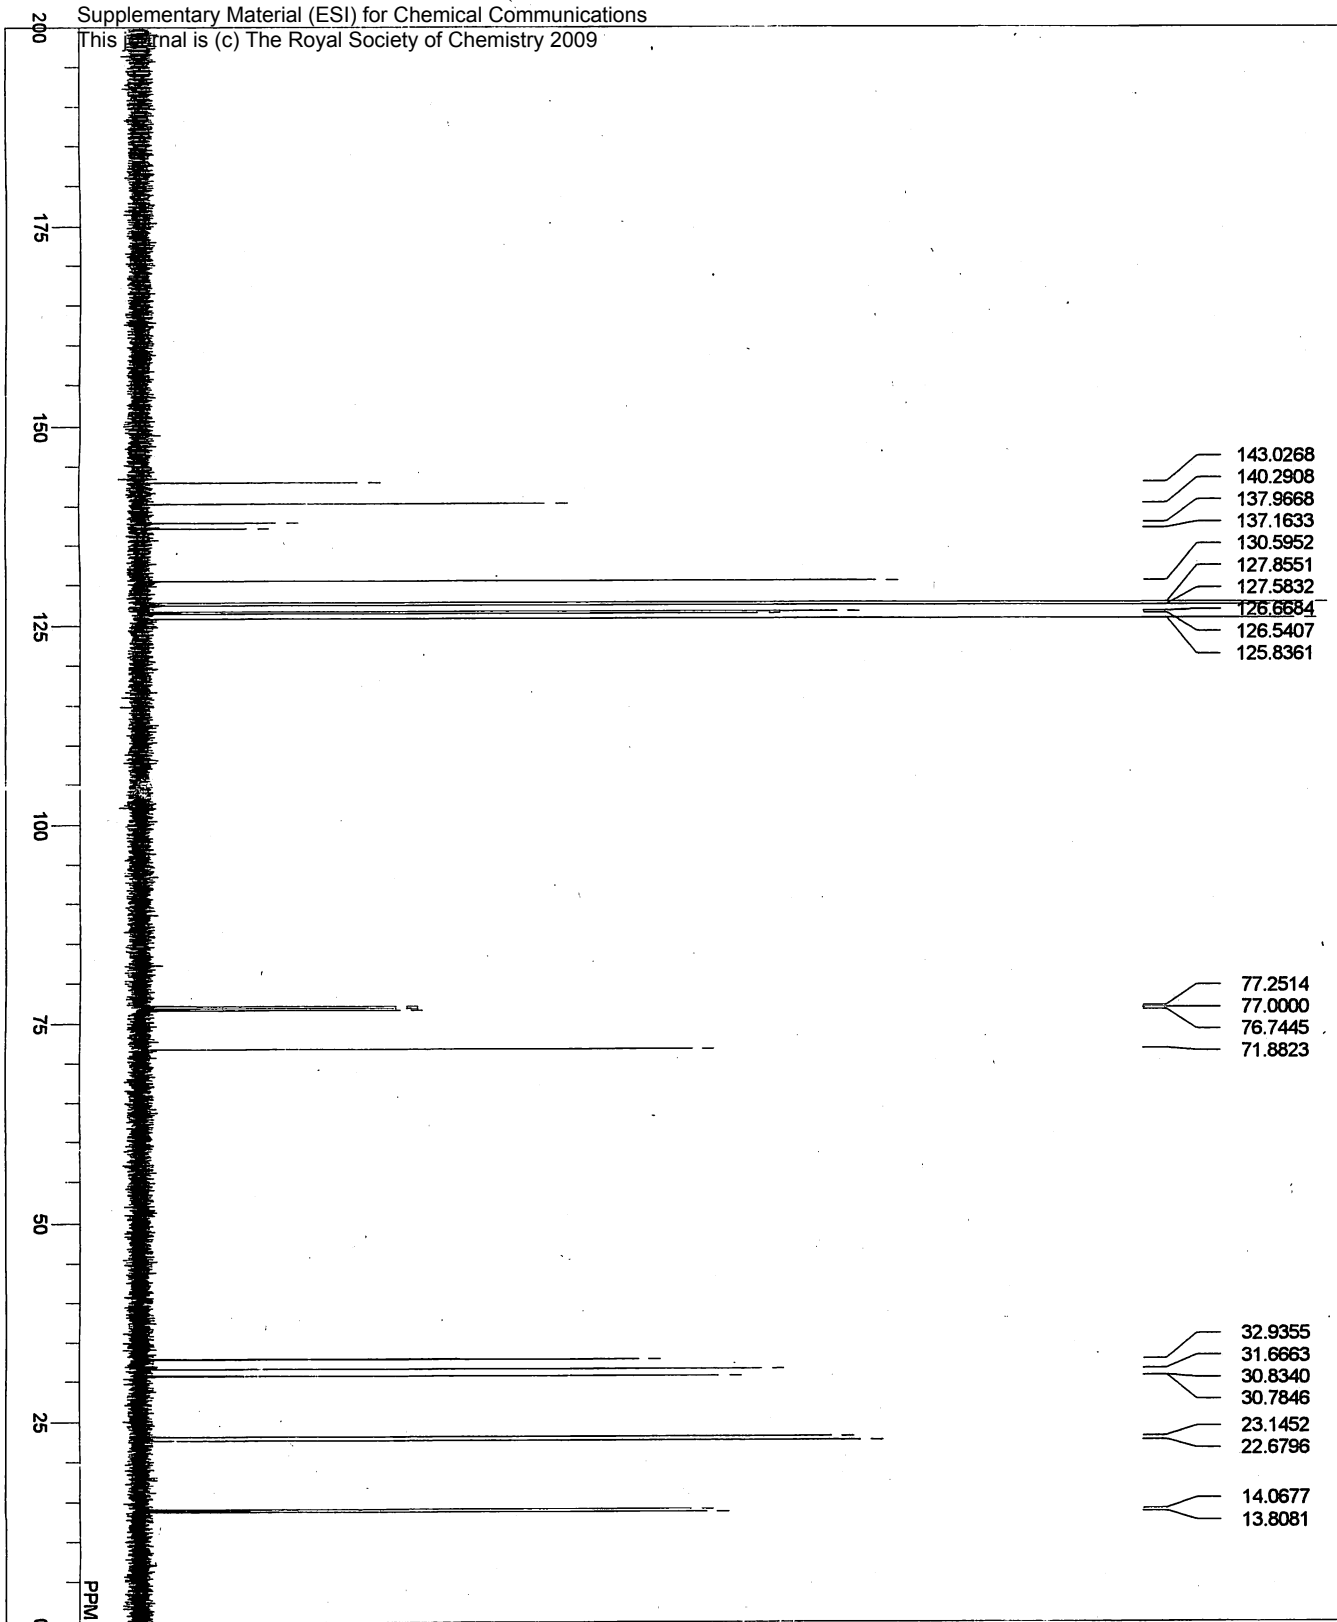

**NAME** 13C  
**OBNUC** 13C  
**OFFR** 125.40 MHz  
**OBSET** 0.00 KHz  
**OBFIN** 143041.00 Hz  
**PW1** 6.25 usec  
**DEADT** 10.00 usec  
**PREDL** 0.01000 msec  
**MT** 1000.0000 msec  
**POINT** 65536  
**SPO** 65536  
**TIMES** 256  
**DUMMY** 2  
**FREQU** 33898.30 Hz  
**FLT** 16950 Hz  
**DELAY** 11.80 usec  
**ACQTM** 1.9333 sec  
**PD** 1.0670 sec  
**ADBIT** 16  
**RGAIN** 31  
**BF** 0.12 Hz  
**T1** 0.00  
**T2** 0.00  
**T3** 90.00  
**T4** 100.00  
**EXMOD** bnm  
**EXPCM** single pulse with bilevel decoupling  
**IRNUC** 1H  
**IFR** 499.10 MHz  
**IRSET** 0.00 KHz  
**IRFIN** 128250.00 Hz  
**IRRPW** 50 usec  
**IRATT** 511  
**DFILE** \_DEFAULTS  
**SF** tfsat  
**LKSET** 0.00 KHz  
**LKFIN** 26934.0 Hz  
**LKLEV** 200  
**LGAIN** 21  
**LKPHS** 353  
**LKSIG** 855  
**CSPED** 13 Hz  
**FILDC**  
**FILDF**  
**SLVNT**  
**DATM** CDCL3  
 Tue Jan 06 13:56:41 2009

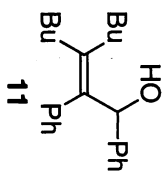



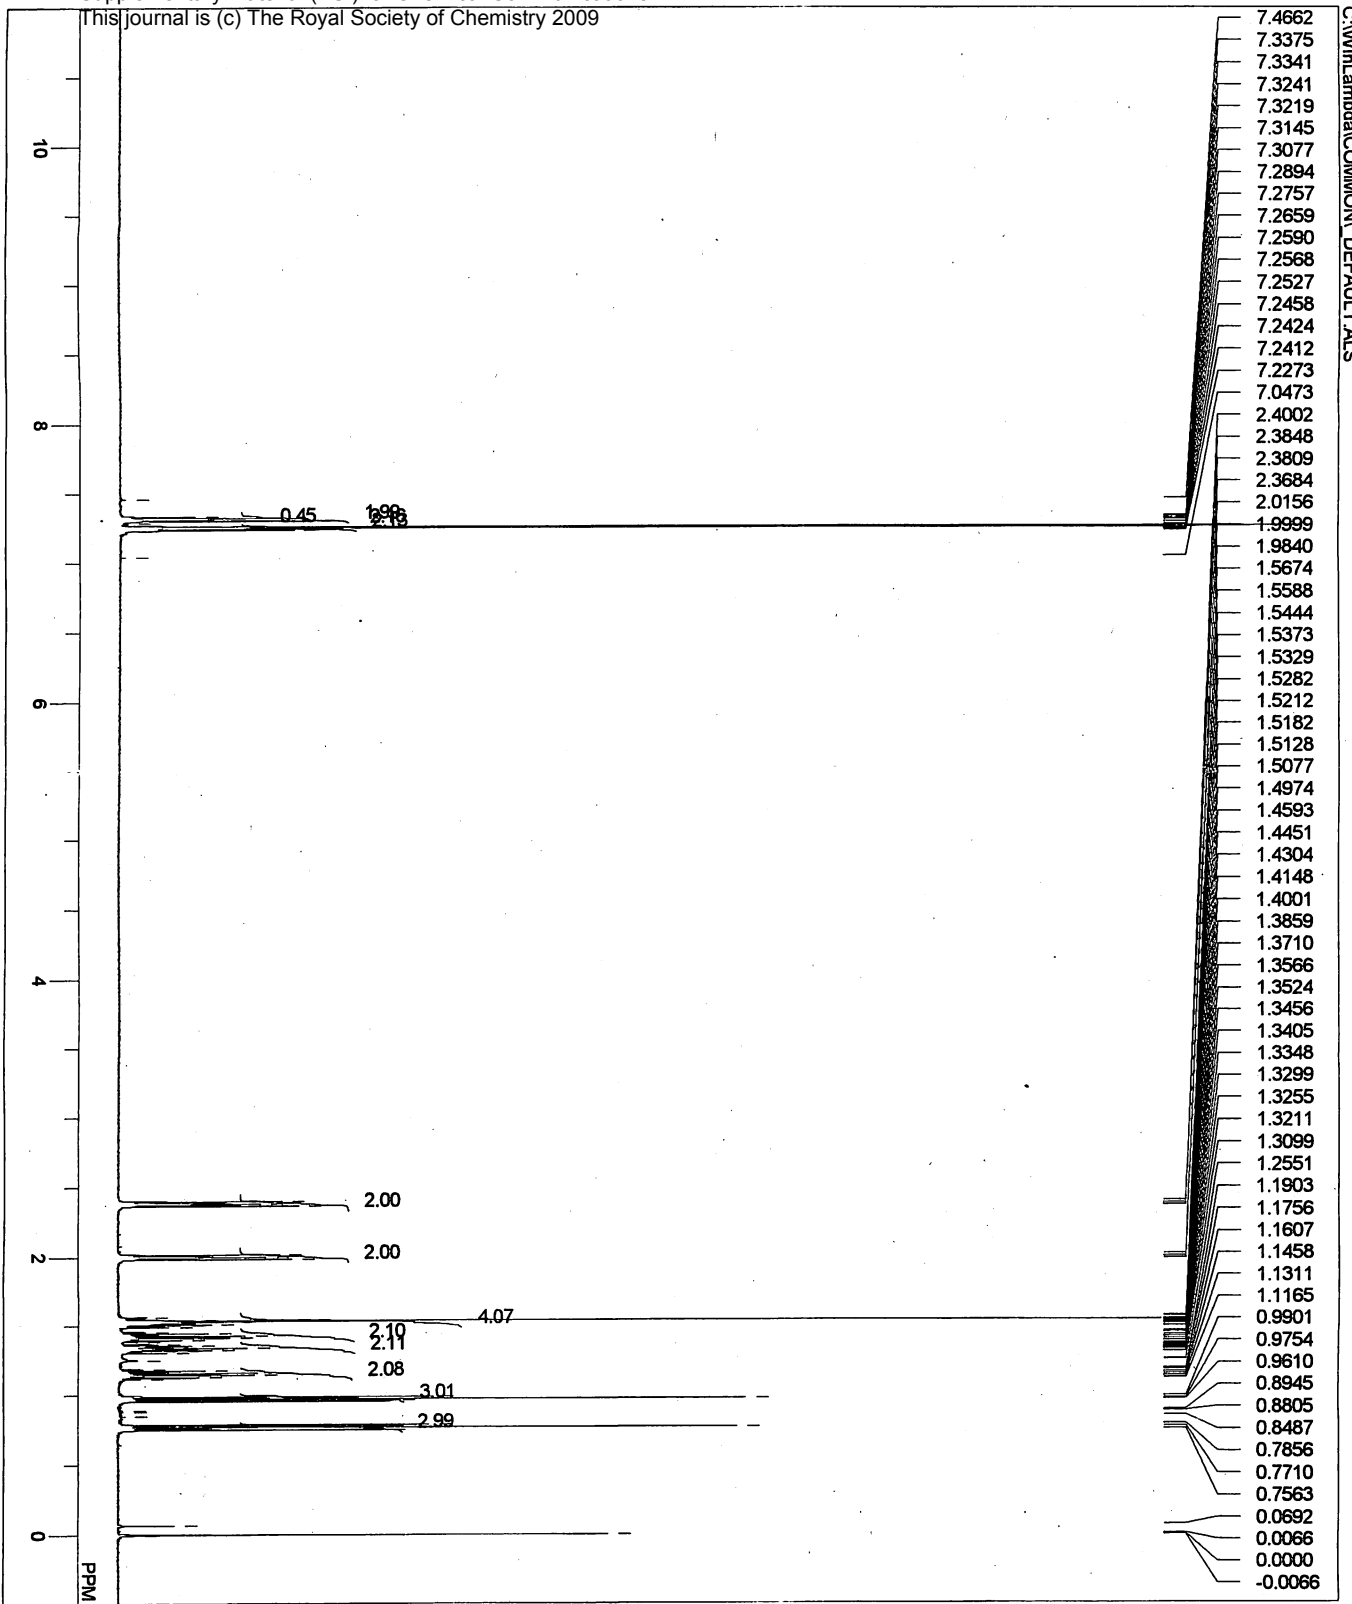

MENUF 1H  
 OBNUC 1H  
 OFR 499.10 MHz  
 OBSET 0.00 KHz  
 OFBIN 128885.00 Hz  
 PW1 5.50 usec  
 DEADT 72.30 usec  
 PREDL 0.01000 msec  
 IWT 1000.0000 msec  
 POINT 65536  
 SPO 65536  
 TIMES 16  
 DUMMY 0  
 FREQU 8000.00 Hz  
 FLT 4000 Hz  
 DELAY 50.00 usec  
 ACQTM 8.1920 sec  
 PD 1.0000 sec  
 ADBIT 16  
 RGAIN 26  
 BF 0.12 Hz  
 T1 0.00  
 T2 0.00  
 T3 90.00  
 T4 100.00  
 EXMOD non  
 EXPCM single pulse nondecoupling & nonpresaturation  
 IRNUC 1H  
 IFR 499.10 MHz  
 IRSET 0.00 KHz  
 IRFIN 128250.00 Hz  
 IRRPW 50 usec  
 IRATN 511  
 DFILE \_DEFAULT.ALS  
 SF thsat  
 LKSET 0.00 KHz  
 LKFIN 26934.0 Hz  
 LKLEV 200  
 LGAIN 22  
 LKPHS 353  
 LKSIG 1148  
 CSPED 15 Hz  
 FILDC  
 FILDF  
 SLVNT CDCL3  
 DATIM Wed Jan 07 12:34:47 2009

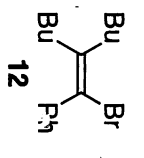

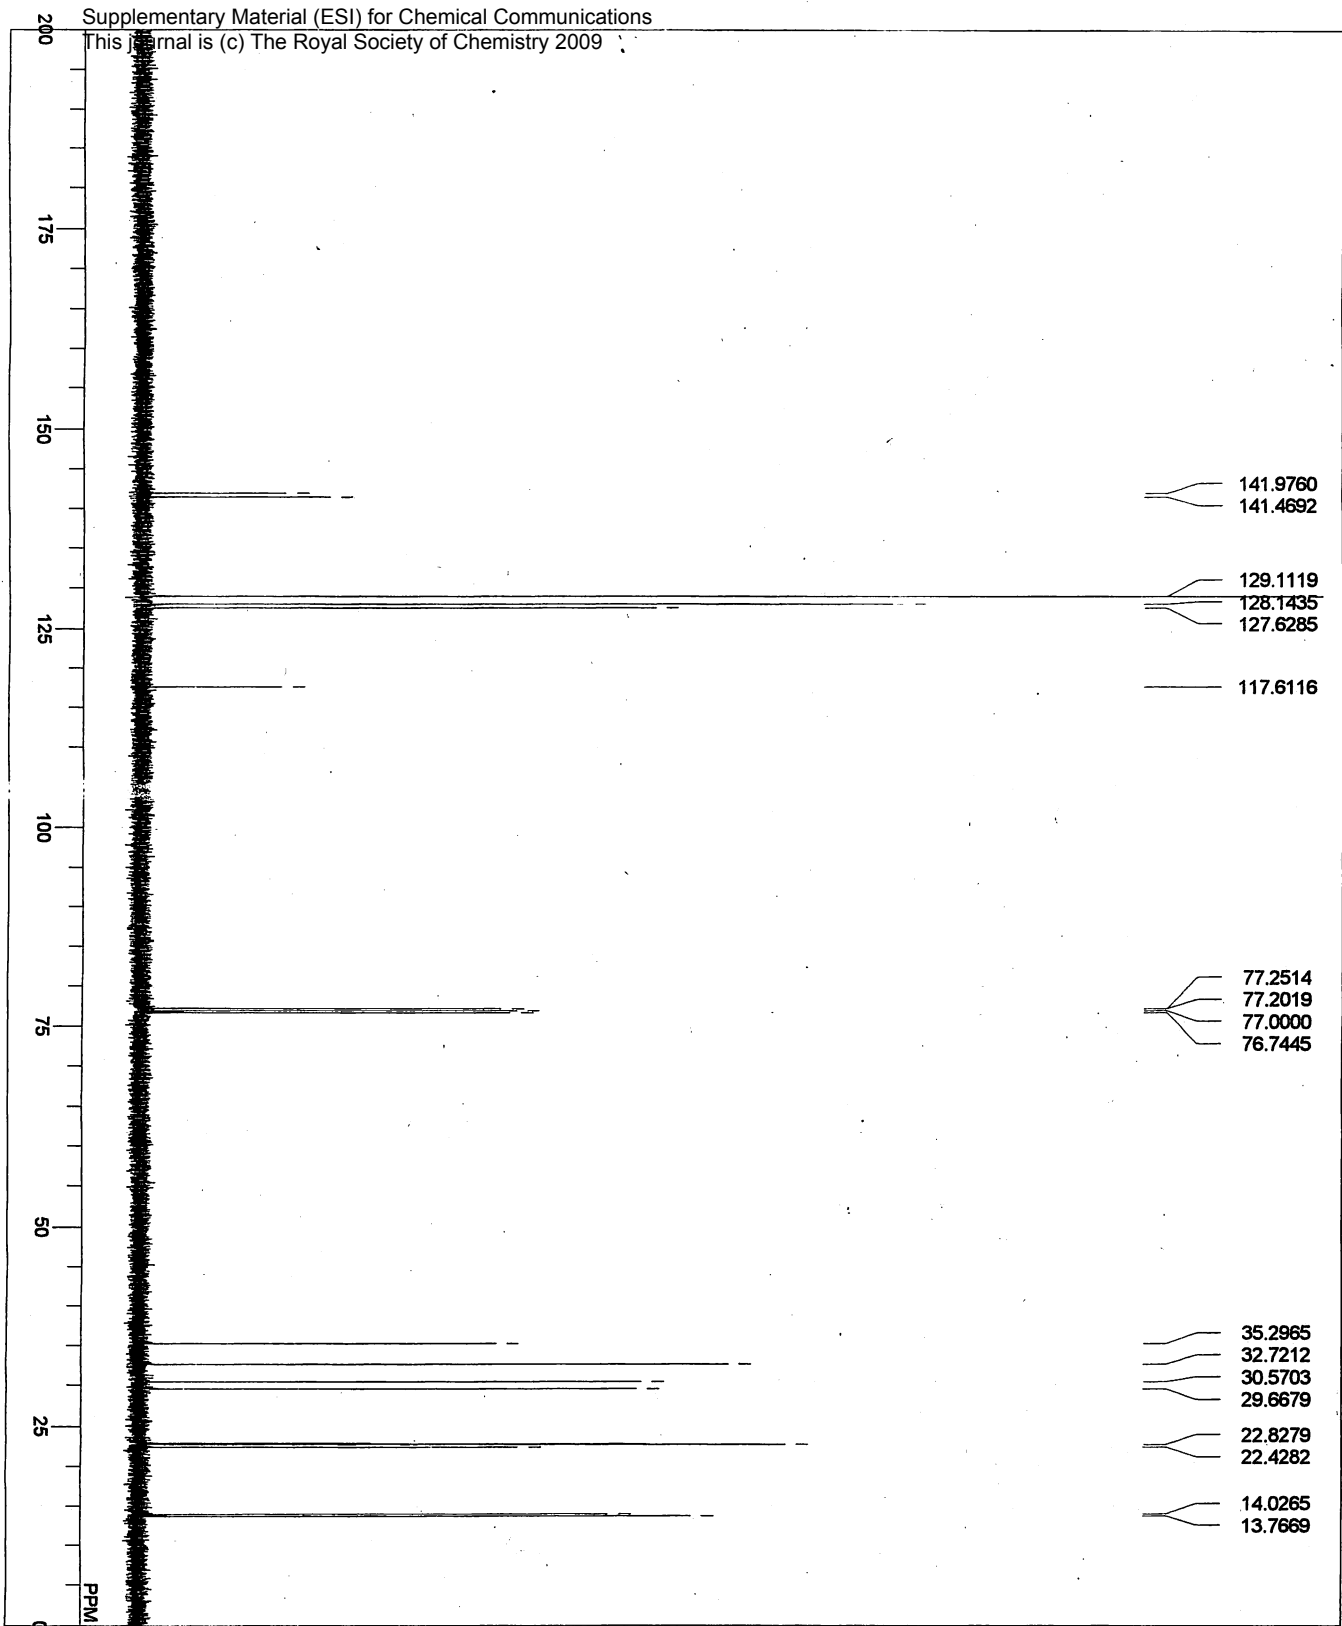

|       |                                     |
|-------|-------------------------------------|
| MENUF | 13C                                 |
| OBNUC | 13C                                 |
| OFFR  | 125.40 MHz                          |
| OBSET | 0.00 KHz                            |
| OBFLY | 143041.00 Hz                        |
| PMW1  | 6.25 usec                           |
| DEADT | 10.00 usec                          |
| PREDL | 0.01000 msec                        |
| IWTT  | 1000.0000 msec                      |
| POINT | 65536                               |
| SPO   | 65536                               |
| TIMES | 1024                                |
| DUMMY | 2                                   |
| FREQU | 33898.30 Hz                         |
| FLT   | 16950 Hz                            |
| DELAY | 11.80 usec                          |
| ACQTM | 1.9333 sec                          |
| PD    | 1.0670 sec                          |
| ADBIT | 16                                  |
| RGAIN | 30                                  |
| BF    | 0.12 Hz                             |
| T1    | 0.00                                |
| T2    | 0.00                                |
| T3    | 90.00                               |
| T4    | 100.00                              |
| EXMOD | bm                                  |
| EXPCM | single pulse with bilvel decoupling |
| IRNUC | 1H                                  |
| IFR   | 499.10 MHz                          |
| IRSET | 0.00 KHz                            |
| IRFIN | 128250.00 Hz                        |
| IRRPW | 50 usec                             |
| IRATN | 511                                 |
| DFILE | _DEFAULT.ALS                        |
| SF    | thsat                               |
| LKSET | 0.00 KHz                            |
| LKFIN | 26934.0 Hz                          |
| LKLEY | 200                                 |
| LGAIN | 21                                  |
| LKPHS | 353                                 |
| LKSIG | 836                                 |
| CSPED | 10 Hz                               |
| FILDC |                                     |
| FILDF |                                     |
| SLVNT | CDCL3                               |
| DATIM | Wed Jan 07 15:23:43 2009            |

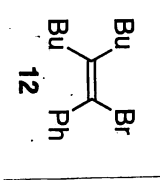

Supplement: b900345b2.pdf [file b900345b2.pdf]
