# Supplementary material for: Iron-catalyzed carbolithiation of alkynes having no heteroatoms
Source: Royal Society of Chemistry journal article supplement (doi:10.1039/b900345b), 2009-01-01
Supplement: b900345b1.pdf [file b900345b1.pdf]

Supporting Information for  
**Iron-catalyzed carbolithiation of alkynes having no heteroatoms**

Eiji Shirakawa,\* Daiji Ikeda, Tsubasa Ozawa, Shogo Watanabe and Tamio Hayashi\*

**General Remarks.** All manipulations of oxygen- and moisture-sensitive materials were conducted with a standard Schlenk technique under a nitrogen atmosphere. Nuclear magnetic resonance spectra were taken on a JEOL JNM LA500 spectrometer ( $^1\text{H}$ , 500 MHz;  $^{13}\text{C}$ , 125 MHz) using tetramethylsilane ( $^1\text{H}$  and  $^{13}\text{C}$ ) as an internal standard. GC spectra were taken on Hewlett-Packard HP6890. GC-MS spectra were taken on Shimadzu GCMS-QP5050A. High-resolution mass spectra were obtained with a Bruker Daltonics microTOF-Q spectrometer (APCI and ESI). Preparative recycling gel permeation chromatography (GPC) was performed with JAI LC-908 equipped with JAIGEL-1H and -2H using chloroform as an eluent. Unless otherwise noted, reagents were commercially available and used without further purification. Diethyl ether was purified by passing through an alumina/catalyst column system (GlassContour Co.). Isobutyl-, 3,5-xylyl- and phenyllithiums were prepared from the corresponding halides by halogen–lithium exchange using *t*-BuLi (2 equiv).

**Iron-Catalyzed Alkylolithiation of Alkynes (Table 2).**

**Method A:** A solution of  $\text{FeCl}_3$  (3.7 mg, 23  $\mu\text{mol}$ ),  $\text{PPh}_3$  (11.8 mg, 45  $\mu\text{mol}$ ), and *N,N,N',N'*-tetramethylethylenediamine (TMEDA: 13.6  $\mu\text{L}$ , 90  $\mu\text{mol}$ ) in diethyl ether (1.7 mL) was placed in a 20 mL Schlenk tube and stirred for 10 min at  $-20\text{ }^\circ\text{C}$ . To this solution was added successively an alkyne (0.45 mmol) and a solution of an alkylolithium (0.68 mmol), and the mixture was stirred at  $-20\text{ }^\circ\text{C}$ . After the time specified in Table 2, methanol (0.20 mL) was added and stirring was continued for 5 min.  $\text{H}_2\text{O}$  (10 mL) was added and the resulting mixture was extracted with diethyl ether (10 mL x 3). The combined organic layer was dried over anhydrous magnesium sulfate. Evaporation of the solvent followed by purification with PTLC ( $\text{SiO}_2$ ) gave the corresponding alkylolithiation products, whose isomer ratio was determined by GC and  $^1\text{H}$  NMR. The product was further purified by GPC if necessary.

**Method B:** To a solution of  $\text{FeCl}_3$  (3.2 mg, 20  $\mu\text{mol}$ ),  $\text{PPh}_3$  (10.5 mg, 40  $\mu\text{mol}$ ), and an alkyne (0.60 mmol) in diethyl ether (1.0 mL) placed in a 20 mL Schlenk tube was added Zn powder (5.2 mg, 80  $\mu\text{mol}$ ) at room temperature and the reaction mixture was stirred for 10 min. To this solution was added successively *N,N,N',N'*-tetramethylethylenediamine (TMEDA: 12.0  $\mu\text{L}$ , 80  $\mu\text{mol}$ ) and a solution of an alkylolithium (0.40 mmol), and the mixture was stirred at  $-20\text{ }^\circ\text{C}$ . After the time specified in Table 2, methanol (0.20 mL) was added and stirring was continued for 5 min.  $\text{H}_2\text{O}$  (1.0 mL) was added and the resulting mixture was extracted with diethyl ether (10 mL x 3). The combined organic layer was dried over anhydrous magnesium sulfate. Evaporation of the solvent followed by purification with PTLC ( $\text{SiO}_2$ ) gave the corresponding butyllithiation products, whose isomer ratio was determined by GC and  $^1\text{H}$  NMR. The product was further purified if necessary.

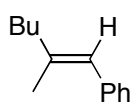

**(E)-2-Methyl-1-phenyl-1-hexene (5a, entry 9 of Table 1, cf. Method B in Table 2).**<sup>1</sup> A colorless oil.  $^1\text{H}$  NMR (500 MHz,  $\text{CDCl}_3$ )  $\delta$  0.94 (t,  $J = 7.4$  Hz, 3 H), 1.36 (sext,  $J = 7.4$  Hz, 2 H), 1.49 (quint,  $J = 7.8$  Hz, 2 H), 1.85 (d,  $J = 1.3$  Hz, 3 H), 2.17 (t,  $J = 7.6$  Hz, 2 H), 6.26 (s, 1

H), 7.17 (t,  $J = 7.3$  Hz, 1 H), 7.23 (q,  $J = 7.4$  Hz, 2 H), 7.30 (t,  $J = 7.6$  Hz, 2 H).

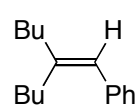

**2-Butyl-1-phenyl-1-hexene (entries 1 and 7 of Table 2).**<sup>2</sup> A colorless oil. <sup>1</sup>H NMR (500 MHz, CDCl<sub>3</sub>)  $\delta$  0.88 (t,  $J = 7.3$  Hz, 3 H), 0.94 (t,  $J = 7.3$  Hz, 3 H), 1.31 (sext,  $J = 7.3$  Hz, 2 H), 1.37 (sext,  $J = 7.5$  Hz, 2 H), 1.40–1.53 (m, 4 H), 2.16 (t,  $J = 7.6$  Hz, 2 H), 2.22 (t,  $J = 8.1$  Hz, 2 H), 6.25 (s, 1 H), 7.16 (t,  $J = 7.4$  Hz, 1 H), 7.19 (d,  $J = 7.4$  Hz, 2 H), 7.29 (t,  $J = 7.4$  Hz, 2 H).

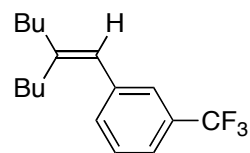

**2-Butyl-1-[3-(trifluoromethyl)phenyl]-1-hexene (entry 2 of Table 2).** A colorless oil. <sup>1</sup>H NMR (500 MHz, CDCl<sub>3</sub>)  $\delta$  0.88 (t,  $J = 7.4$  Hz, 3 H), 0.95 (t,  $J = 7.4$  Hz, 3 H), 1.31 (sext,  $J = 7.3$  Hz, 2 H), 1.37 (sext,  $J = 7.5$  Hz, 2 H), 1.41–1.54 (m, 4 H), 2.14–2.22 (m, 4 H), 6.26 (s, 1 H), 7.35 (d,  $J = 7.6$  Hz, 1 H), 7.40 (t,  $J = 7.6$  Hz, 1 H), 7.43 (d,  $J = 7.6$  Hz, 1 H), 7.44 (s, 1 H). <sup>13</sup>C NMR (125 MHz, CDCl<sub>3</sub>)  $\delta$  14.0, 14.2, 22.7, 23.0, 30.5, 30.6, 30.6, 37.1, 122.65 (q, <sup>3</sup> $J_{C-F} = 3.8$  Hz), 123.5, 124.5 (q, <sup>1</sup> $J_{C-F} = 272.0$  Hz), 125.5 (q, <sup>3</sup> $J_{C-F} = 4.0$  Hz), 128.6, 130.6 (q, <sup>2</sup> $J_{C-F} = 31.9$  Hz), 132.0, 139.6, 146.1. HRMS (APCI) Calcd for C<sub>17</sub>H<sub>23</sub>F<sub>3</sub>: M<sup>+</sup>, 284.1746. Found: m/z 284.1756.

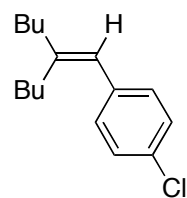

**2-Butyl-1-(4-chlorophenyl)-1-hexene (entry 3 of Table 2).** A colorless oil. <sup>1</sup>H NMR (500 MHz, CDCl<sub>3</sub>)  $\delta$  0.88 (t,  $J = 7.3$  Hz, 3 H), 0.94 (t,  $J = 7.3$  Hz, 3 H), 1.29 (sext,  $J = 7.4$  Hz, 2 H), 1.36 (sext,  $J = 7.5$  Hz, 2 H), 1.38–1.52 (m, 4 H), 2.14 (t,  $J = 7.9$  Hz, 2 H), 2.18 (t,  $J = 7.9$  Hz, 2 H), 6.18 (s, 1 H), 7.11 (d,  $J = 8.3$  Hz, 2 H), 7.25 (d,  $J = 8.3$  Hz, 2 H). <sup>13</sup>C NMR (125 MHz, CDCl<sub>3</sub>)  $\delta$  14.1, 14.2, 22.7, 23.0, 30.5, 30.59, 30.62, 37.1, 123.7, 128.3, 130.1, 131.6, 137.4, 144.9. HRMS (APCI) Calcd for C<sub>16</sub>H<sub>23</sub>Cl: M<sup>+</sup>, 250.1483. Found: m/z 250.1479.

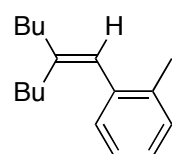

**2-Butyl-1-(2-methylphenyl)-1-hexene (entry 4 of Table 2).** A colorless oil. <sup>1</sup>H NMR (500 MHz, CDCl<sub>3</sub>)  $\delta$  0.85 (t,  $J = 7.3$  Hz, 3 H), 0.99 (t,  $J = 7.4$  Hz, 3 H), 1.25 (sext,  $J = 7.4$  Hz, 2 H), 1.35–1.48 (m, 4 H), 1.54 (quint,  $J = 7.5$  Hz, 2 H), 2.09 (t,  $J = 7.8$  Hz, 2 H), 2.22 (t,  $J = 7.5$  Hz, 2 H), 2.25 (s, 3 H), 6.23 (s, 1 H), 7.10–7.21 (m, 4 H). <sup>13</sup>C NMR (125 MHz, CDCl<sub>3</sub>)  $\delta$  14.1, 14.2, 20.1, 22.7, 22.8, 30.2, 30.52, 30.55, 36.2, 124.2, 125.4, 126.3, 129.4, 129.7, 136.5, 138.3, 143.2. HRMS (APCI) Calcd for C<sub>17</sub>H<sub>26</sub>: M<sup>+</sup>, 230.2029. Found: m/z 230.2021.

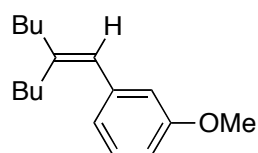

**2-Butyl-1-(3-methoxyphenyl)-1-hexene (entry 5 of Table 2).** A colorless oil. <sup>1</sup>H NMR (500 MHz, CDCl<sub>3</sub>)  $\delta$  0.90 (t,  $J = 7.3$  Hz, 3 H), 0.96 (t,  $J = 7.3$  Hz, 3 H), 1.33 (sext,  $J = 7.4$  Hz, 2 H), 1.38 (sext,  $J = 7.5$  Hz, 2 H), 1.42–1.56 (m, 4 H), 2.17 (t,  $J = 7.6$  Hz, 2 H), 2.24 (t,  $J = 8.0$  Hz, 2 H), 3.81 (s, 3 H), 6.24 (s, 1 H), 6.75 (d,  $J = 7.7$  Hz, 1 H), 6.76 (s, 1 H), 6.81 (d,  $J = 7.7$  Hz, 1 H), 7.22 (t,  $J = 7.7$  Hz, 1 H). <sup>13</sup>C NMR (125 MHz, CDCl<sub>3</sub>)  $\delta$  14.1, 14.2, 22.7, 23.1, 30.6, 30.70, 30.74, 37.1, 55.3, 111.6, 114.2, 121.4, 124.7, 129.1, 140.3, 144.4, 159.5. HRMS (APCI) Calcd for C<sub>17</sub>H<sub>27</sub>O: [M+H]<sup>+</sup>, 247.2056. Found: m/z 247.2053.

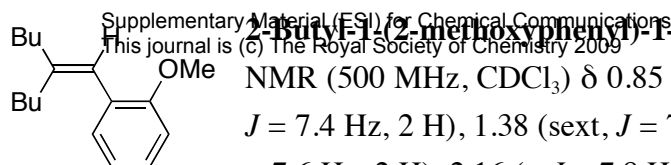

**(Z)-2-Butyl-1-(2-methoxyphenyl)-1-hexene (entry 6 of Table 2).** A colorless oil.  $^1\text{H}$  NMR (500 MHz,  $\text{CDCl}_3$ )  $\delta$  0.85 (t,  $J = 7.3$  Hz, 3 H), 0.94 (t,  $J = 7.3$  Hz, 3 H), 1.27 (sext,  $J = 7.4$  Hz, 2 H), 1.38 (sext,  $J = 7.4$  Hz, 2 H), 1.42 (quint,  $J = 7.7$  Hz, 2 H), 1.51 (quint,  $J = 7.6$  Hz, 2 H), 2.16 (t,  $J = 7.8$  Hz, 2 H), 2.19 (t,  $J = 7.6$  Hz, 2 H), 3.81 (s, 3 H), 6.26 (s, 1 H), 6.85 (d,  $J = 8.2$  Hz, 1 H), 6.90 (t,  $J = 7.4$  Hz, 1 H), 7.15 (d,  $J = 7.4$  Hz, 1 H), 7.18 (t,  $J = 7.8$  Hz, 1 H).  $^{13}\text{C}$  NMR (125 MHz,  $\text{CDCl}_3$ )  $\delta$  14.1, 14.2, 22.7, 23.0, 30.6, 30.7, 30.8, 36.7, 55.6, 110.6, 120.1, 120.3, 127.4, 127.9, 130.3, 143.8, 157.3. HRMS (APCI) Calcd for  $\text{C}_{17}\text{H}_{27}\text{O}$ :  $[\text{M}+\text{H}]^+$ , 247.2056. Found:  $m/z$  247.2054.

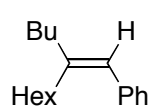

**(Z)-2-Butyl-1-phenyl-1-octene (entry 8 of Table 2).** A colorless oil.  $^1\text{H}$  NMR (500 MHz,  $\text{CDCl}_3$ )  $\delta$  0.87 (t,  $J = 7.0$  Hz, 3 H), 0.94 (t,  $J = 7.3$  Hz, 3 H), 1.20–1.34 (m, 6 H), 1.37 (sext,  $J = 7.4$  Hz, 2 H), 1.40–1.52 (m, 4 H), 2.16 (t,  $J = 7.7$  Hz, 2 H), 2.21 (t,  $J = 8.0$  Hz, 2 H), 6.25 (s, 1 H), 7.14–7.21 (m, 3 H), 7.29 (t,  $J = 7.6$  Hz, 2 H).  $^{13}\text{C}$  NMR (125 MHz,  $\text{CDCl}_3$ )  $\delta$  14.05, 14.06, 22.57, 22.63, 28.3, 29.5, 30.5, 30.7, 31.7, 37.0, 124.7, 125.7, 128.0, 128.6, 138.8, 143.9. HRMS (APCI) Calcd for  $\text{C}_{18}\text{H}_{28}$ :  $\text{M}^+$ , 244.2186. Found:  $m/z$  244.2188.

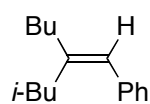

**(Z)-2-Isobutyl-1-phenyl-1-hexene (entry 9 of Table 2).** A colorless oil.  $^1\text{H}$  NMR (500 MHz,  $\text{CDCl}_3$ )  $\delta$  0.82 (d,  $J = 6.7$  Hz, 6 H), 0.94 (t,  $J = 7.3$  Hz, 3 H), 1.37 (sext,  $J = 7.3$  Hz, 2 H), 1.48 (quint,  $J = 7.4$  Hz, 2 H), 1.83 (nonet,  $J = 7.2$  Hz, 1 H), 2.11–2.18 (m, 2 H), 2.13 (d,  $J = 7.2$  Hz, 2 H), 6.33 (s, 1 H), 7.14–7.22 (m, 3 H), 7.28 (t,  $J = 7.6$  Hz, 2 H).  $^{13}\text{C}$  NMR (125 MHz,  $\text{CDCl}_3$ )  $\delta$  14.0, 22.5, 22.6, 26.4, 30.5, 36.9, 39.1, 125.7, 125.9, 127.9, 128.9, 139.0, 142.6. HRMS (APCI) Calcd for  $\text{C}_{16}\text{H}_{24}$ :  $\text{M}^+$ , 216.1873. Found:  $m/z$  216.1866.

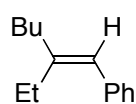

**(E)-2-Ethyl-1-phenyl-1-hexene (entry 10 of Table 2).**<sup>3</sup> A colorless oil.  $^1\text{H}$  NMR (500 MHz,  $\text{CDCl}_3$ )  $\delta$  0.94 (t,  $J = 7.3$  Hz, 3 H), 1.07 (t,  $J = 7.6$  Hz, 3 H), 1.37 (sext,  $J = 7.3$  Hz, 2 H), 1.49 (quint,  $J = 7.4$  Hz, 2 H), 2.17 (t,  $J = 7.7$  Hz, 2 H), 2.25 (q,  $J = 7.6$  Hz, 2 H), 6.24 (s, 1 H), 7.17 (t,  $J = 7.4$  Hz, 1 H), 7.21 (t,  $J = 7.3$  Hz, 2 H), 7.30 (t,  $J = 7.6$  Hz, 2 H).

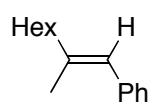

**(E)-2-Methyl-1-phenyl-1-octene (entry 11 of Table 2).**<sup>4</sup> A colorless oil.  $^1\text{H}$  NMR (500 MHz,  $\text{CDCl}_3$ )  $\delta$  0.90 (t,  $J = 7.0$  Hz, 3 H), 1.24–1.38 (m, 6 H), 1.51 (quint,  $J = 7.5$  Hz, 2 H), 1.85 (d,  $J = 1.4$  Hz, 3 H), 2.16 (t,  $J = 7.7$  Hz, 2 H), 6.26 (s, 1 H), 7.17 (t,  $J = 7.3$  Hz, 1 H), 7.23 (t,  $J = 7.2$  Hz, 2 H), 7.30 (t,  $J = 7.6$  Hz, 2 H).

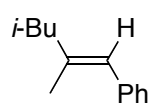

**(E)-2,4-Dimethyl-1-phenyl-1-pentene (entry 12 of Table 2).** A colorless oil.  $^1\text{H}$  NMR (500 MHz,  $\text{CDCl}_3$ )  $\delta$  0.92 (d,  $J = 6.6$  Hz, 6 H), 1.83 (d,  $J = 1.4$  Hz, 3 H), 1.86 (nonet,  $J = 6.6$  Hz, 1 H), 2.03 (dd,  $J = 7.3, 0.8$  Hz, 2 H), 6.24 (s, 1 H), 7.17 (t,  $J = 7.4$  Hz, 1 H), 7.24 (d,  $J = 7.5$  Hz, 2 H), 7.31 (t,  $J = 7.7$  Hz, 2 H).  $^{13}\text{C}$  NMR (125 MHz,  $\text{CDCl}_3$ )  $\delta$  17.7, 22.5, 26.4, 50.5, 125.8, 126.1, 128.0, 128.8, 138.3, 138.7. HRMS (APCI) Calcd for  $\text{C}_{13}\text{H}_{18}$ :  $\text{M}^+$ , 174.1403. Found:  $m/z$  174.1411.

**Aryllithiation of Alkynes Catalyzed Cooperatively by Iron and Copper Complexes (Scheme 1).** To a solution of  $\text{Fe}(\text{acac})_3$  (7.1 mg, 20  $\mu\text{mol}$ ),  $\text{CuBr}$  (5.7 mg, 40  $\mu\text{mol}$ ),  $\text{PBU}_3$  (40  $\mu\text{L}$ , 0.16 mmol), and an alkyne

(0.40 mmol) in diethyl ether (10 mL) placed in a 20 mL Schlenk tube was added a solution of an aryllithium (0.80 mmol) at room temperature. After the reaction mixture was stirred at 30 °C for the time specified in Scheme 1, methanol (0.20 mL) was added and stirring was continued for 5 min. H<sub>2</sub>O (10 mL) was added and the resulting mixture was extracted with diethyl ether (10 mL x 3). The combined organic layer was dried over anhydrous magnesium sulfate. Evaporation of the solvent followed by purification with PTLC (SiO<sub>2</sub>) gave the corresponding aryllithiation products, whose isomer ratio was determined by GC and <sup>1</sup>H NMR. The product was further purified by GPC if necessary.

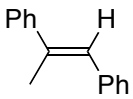 **(E)-1,2-Diphenyl-1-propene (8a).**<sup>5</sup> A white solid. <sup>1</sup>H NMR (500 MHz, CDCl<sub>3</sub>) δ 2.29 (d, *J* = 1.4 Hz, 3 H), 6.84 (d, *J* = 1.4 Hz, 1 H), 7.22–7.32 (m, 2 H), 7.34–7.41 (m, 6 H), 7.51–7.55 (m, 2 H).

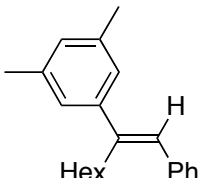 **(E)-1-Phenyl-2-(3,5-xylyl)-1-octene (8b).**<sup>6</sup> A colorless oil. <sup>1</sup>H NMR (500 MHz, CDCl<sub>3</sub>) δ 0.84 (t, *J* = 7.1 Hz, 3 H), 1.16–1.34 (m, 6 H), 1.37–1.45 (m, 2 H), 2.34 (s, 6 H), 2.66 (t, *J* = 8.0 Hz, 2 H), 6.65 (s, 1 H), 6.93 (s, 1 H), 7.06 (s, 2 H), 7.23 (t, *J* = 7.2 Hz, 1 H), 7.30 (d, *J* = 7.1 Hz, 2 H), 7.35 (t, *J* = 7.5 Hz, 2 H).

**Butyllithiation of 1-Phenyl-1-hexyne Followed by Reaction with Electrophiles (Scheme 2).** A solution of FeCl<sub>3</sub> (3.2 mg, 20 μmol), PPh<sub>3</sub> (10.5 mg, 40 μmol), and *N,N,N',N'*-tetramethylethylenediamine (TMEDA: 12.0 μL, 80 μmol) in diethyl ether (1.0 mL) was placed in a 20 mL Schlenk tube and stirred for 10 min at –20 °C. To this solution was added successively 1-phenyl-1-hexyne (**2c**: 63.3 mg, 0.40 mmol) and a hexane solution of butyllithium (**1a**: 1.60 M, 0.38 mL, 0.60 mmol), and the mixture was stirred for 1.5 h at –20 °C. After an electrophile (amount specified in Scheme 2) was added and stirring was continued for the time specified in Scheme 2. H<sub>2</sub>O (10 mL) was added and the resulting mixture was extracted with diethyl ether (10 mL x 3). The combined organic layer was dried over anhydrous magnesium sulfate. Evaporation of the solvent followed by purification with PTLC (SiO<sub>2</sub>) gave the corresponding product. The product was further purified by GPC if necessary.

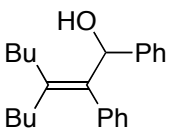 **3-Butyl-1,2-diphenyl-2-hepten-1-ol (11).** A colorless oil. <sup>1</sup>H NMR (500 MHz, CDCl<sub>3</sub>) δ 0.72 (t, *J* = 7.3 Hz, 3 H), 0.98 (t, *J* = 7.3 Hz, 3 H), 1.04–1.15 (m, 2 H), 1.21–1.36 (m, 2 H), 1.37–1.52 (m, 2 H), 1.53–1.63 (m, 2 H), 1.70 (d, *J* = 7.5 Hz, 1 H), 1.76–1.88 (m, 2 H), 2.26–2.36 (m, 1 H), 2.42–2.51 (m, 1 H), 5.96 (d, *J* = 7.5 Hz, 1 H), 6.65–6.84 (m, 2 H), 7.12–7.18 (m, 3 H), 7.18–7.23 (m, 3 H), 7.24–7.29 (m, 2 H). <sup>13</sup>C NMR (125 MHz, CDCl<sub>3</sub>) δ 13.8, 14.1, 22.7, 23.1, 30.78, 30.83, 31.7, 32.9, 71.9, 125.8, 126.5, 126.7, 127.6, 127.9, 130.6, 137.2, 138.0, 140.3, 143.0. HRMS (ESI) Calcd for C<sub>23</sub>H<sub>30</sub>ONa: [M+Na]<sup>+</sup>, 345.2189. Found: *m/z* 345.2184.

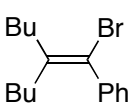 **1-Bromo-2-butyl-1-phenyl-1-hexene (12).** A colorless oil. <sup>1</sup>H NMR (500 MHz, CDCl<sub>3</sub>) δ 0.77 (t, *J* = 7.3 Hz, 3 H), 0.98 (t, *J* = 7.3 Hz, 3 H), 1.15 (sext, *J* = 7.4 Hz, 2 H), 1.34 (quint, *J* = 7.6 Hz, 2 H), 1.42 (sext, *J* = 7.3 Hz, 2 H), 1.53 (quint, *J* = 7.7 Hz, 2 H), 2.00 (t, *J* = 7.9 Hz, 2 H), 2.38 (t, *J* = 8.0 Hz, 2 H), 7.23–7.28 (m, 3 H), 7.30–7.35 (m, 2 H). <sup>13</sup>C NMR (125 MHz, CDCl<sub>3</sub>) δ 13.8,

Supplementary Material (ESI) for Chemical Communications  
This journal is (c) The Royal Society of Chemistry 2009  
14.0, 274.1, 278.2, 294.0, 327.3, 353.4, 379.6, 417.8, 427.6, 128.1, 129.1, 141.5, 142.0. HRMS (APCI) Calcd for C<sub>17</sub>H<sub>23</sub>Br: M<sup>+</sup>, 294.0978. Found: m/z 294.0973.

## References

- 1 (a) J. K. Crandall and F. Collonges, *J. Org. Chem.*, 1976, **41**, 4089–4092; (b) A. Barbero, Y. Blanco, C. García and F. J. Pulido, *Synthesis*, 2000, 1223–1228.
- 2 J. Barluenga, M. Yus, J. M. Concellón and P. Bernad, *J. Org. Chem.*, 1981, **46**, 2721–2726.
- 3 (a) A. Commercon, J. Normant and J. Villieras, *J. Organomet. Chem.*, 1975, **93**, 415–421; (b) B. Scheiper, M. Bonnekessel, H. Krause and A. Fürstner, *J. Org. Chem.*, 2004, **69**, 3943–3949.
- 4 J. E. Baldwin, R. M. Adlington, J. C. Bottaro, J. N. Kolhe and I. M. Newington, *Tetrahedron*, 1986, **42**, 4235–4246.
- 5 J. Cotter, A.-M. L. Hogan and D. F. O’Shea, *Org. Lett.*, 2007, **9**, 1493–1496.
- 6 E. Shirakawa, T. Yamagami, T. Kimura, S. Yamaguchi and T. Hayashi, *J. Am. Chem. Soc.*, 2005, **127**, 17164–17165.
